# Supplementary material for: π–π stacking assisted regioselectivity regulation in palladium-catalyzed cyclization reactions: a theoretical study
Source: Royal Society of Chemistry journal article supplement (doi:10.1039/d4ra06552b), 2024-01-01
Supplement: d4ra06552b1.pdf [file d4ra06552b1.pdf]

## Supporting Information

### **$\pi$ - $\pi$ stacking assisted regioselectivity regulation in palladium-catalyzed cyclization reactions: a theoretical study**

*Song Liu<sup>\*a,b</sup>, Dianmin Zhang<sup>\*a</sup>, Yue Gong<sup>a</sup>, Lianli Ma<sup>a</sup>, Li Li<sup>a</sup>, Wei Chen<sup>a</sup>*

<sup>a</sup> Chongqing Key Laboratory for Resource Utilization of Heavy Metal Wastewater, College of Chemistry and Environmental Engineering, Chongqing University of Arts and Sciences, Yongchuan 402160, PR China

<sup>b</sup> School of Chemistry and Chemical Engineering, Chongqing University, Chongqing, 400030, China

## Table of Contents

1. The calculated free energy profiles for the production of intermediate **3'**, when utilizing hept-6-en-4-yn-1-ol **1'** as the substrate. Page S2
2. Completes reference for Gaussian 16. Page S3
3. B3-LYP and M06 calculated absolute calculation energies, enthalpies, and free energies. Page S3
4. B3-LYP calculated geometries for all the optimized compounds and transition states. Page S8

### 1. The calculated free energy profiles for the production of intermediate **3**, when utilizing hept-6-en-4-yn-1-ol **1'** as the substrate.

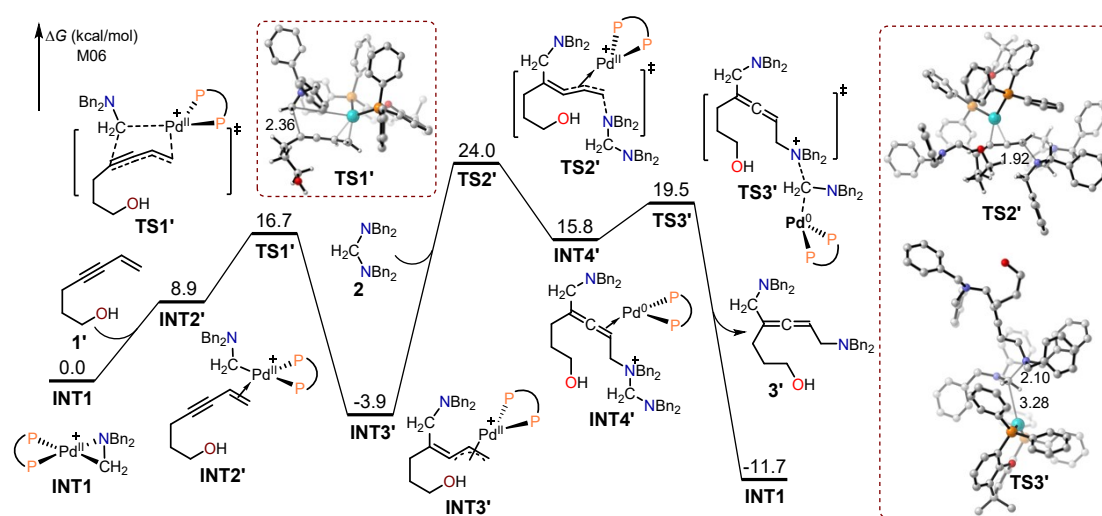

**Figure S1.** The calculated free energy profiles for the production of intermediate **3**, when utilizing hept-6-en-4-yn-1-ol **1'** as the substrate.

The calculated free energy profiles for the generation of intermediate **3** using hept-6-en-4-yn-1-ol **1'** as the substrate are presented in Figure S1, with the aminomethyl cyclopalladated complex **INT1** serving as the reference zero point. The binding of the terminal alkene in substrate **1'**, enynols, to the Pd(II) center led to the creation of intermediate **INT2'**, which is 8.9 kcal/mol endergonic. The subsequent migratory insertion of the enyne's triple bond into the Pd(II)-C bond takes place through transition state **TS1'**, resulting in the formation of the  $\pi$ -allylpalladium intermediate **INT3'**, with a free energy barrier of 16.7 kcal/mol. In transition state **TS1'**, the length of the forming C-C bond is 2.36 Å. Intermediate **INT3'** would be intercepted by an aminal leading to the formation of allene-coordinated

Pd(0) intermediate **INT4'** through an S<sub>N</sub>2-type reductive elimination transition state **TS2'**, characterized by an activation free energy of 27.9 kcal/mol. In transition state **TS2'**, the length of the forming C-N bond is 1.92 Å. The following S<sub>N</sub>2-type oxidative addition occurs between Pd(0) and amino cation via transition state **TS3'** with an energy barrier of 3.7 kcal/mol. After release of the allenic 1,5-diamine intermediate **3'**, formation of aminomethyl cyclopalladated complex **INT1** is exothermic by 11.7 kcal/mol in comparison with substrates **1'** and **2**.

## 2. Complete reference for Gaussian 16

M. J. Frisch, G. W. Trucks, H. B. Schlegel, G. E. Scuseria, M. A. Robb, J. R. Cheeseman, G. Scalmani, V. Barone, G. A. Petersson, H. Nakatsuji, X. Li, M. Caricato, A. V. Marenich, J. Bloino, B. G. Janesko, R. Gomperts, B. Mennucci, H. P. Hratchian, J. V. Ortiz, A. F. Izmaylov, J. L. Sonnenberg, D. Williams-Young, F. Ding, F. Lipparini, F. Egidi, J. Goings, B. Peng, A. Petrone, T. Henderson, D. Ranasinghe, V. G. Zakrzewski, J. Gao, N. Rega, G. Zheng, W. Liang, M. Hada, M. Ehara, K. Toyota, R. Fukuda, J. Hasegawa, M. Ishida, T. Nakajima, Y. Honda, O. Kitao, H. Nakai, T. Vreven, K. Throssell, J. A. Montgomery, Jr., J. E. Peralta, F. Ogliaro, M. J. Bearpark, J. J. Heyd, E. N. Brothers, K. N. Kudin, V. N. Staroverov, T. A. Keith, R. Kobayashi, J. Normand, K. Raghavachari, A. P. Rendell, J. C. Burant, S. S. Iyengar, J. Tomasi, M. Cossi, J. M. Millam, M. Klene, C. Adamo, R. Cammi, J. W. Ochterski, R. L. Martin, K. Morokuma, O. Farkas, J. B. Foresman, and D. J. Fox, Gaussian, Inc., Wallingford CT, 2016.

## 3. B3-LYP and M06 calculated absolute calculation energies, enthalpies, and free energies.

**Table S1.** B3-LYP and M06 calculated absolute calculation energies, enthalpies, and free energies.

| Geometry    | $E_{(\text{elec-B3-LYP})}^1$ | $H_{(\text{corr-B3-LYP})}^2$ | $G_{(\text{corr-B3-LYP})}^3$ | $E_{(\text{solv-M06})}^4$ | IF <sup>5</sup> |
|-------------|------------------------------|------------------------------|------------------------------|---------------------------|-----------------|
| <b>INT1</b> | -3027.109473                 | 0.928176                     | 0.783582                     | -3025.976112              | -               |
| <b>1</b>    | -500.312248                  | 0.188868                     | 0.137244                     | -500.080968               | -               |
| <b>INT2</b> | -3527.413727                 | 1.119040                     | 0.942451                     | -3526.058126              | -               |
| <b>TS1</b>  | -3527.396952                 | 1.117790                     | 0.941423                     | -3526.0377                | -223.1          |
| <b>INT3</b> | -3527.429007                 | 1.119688                     | 0.944885                     | -3526.074217              | -               |
| <b>2</b>    | -1232.605335                 | 0.549166                     | 0.459005                     | -1231.966604              | -               |

|                               |              |          |           |              |        |
|-------------------------------|--------------|----------|-----------|--------------|--------|
| <b>TS2</b>                    | -4760.018624 | 1.672665 | 1.437042  | -4758.037796 | -264.1 |
| <b>INT4</b>                   | -4760.013064 | 1.674575 | 1.436575  | -4758.04873  | -      |
| <b>TS3</b>                    | -4760.023258 | 1.672666 | 1.425285  | -4758.030429 | -61.4  |
| <b>3</b>                      | -1732.949456 | 0.742253 | 0.623787  | -1732.082023 | -      |
| <b>TS4</b>                    | -4760.029730 | 1.670402 | 1.430194  | -4758.029331 | -200.1 |
| <b>TS5</b>                    | -3527.375674 | 1.119259 | 0.952141  | -3526.010973 | -332.6 |
| <b>1'</b>                     | -3027.109473 | 0.928176 | 0.783582  | -3025.976112 | -      |
| <b>INT2'</b>                  | -3374.984696 | 1.093453 | 0.920188  | -3373.706063 | -      |
| <b>TS1'</b>                   | -3374.969675 | 1.092387 | 0.919278  | -3373.692693 | -110.2 |
| <b>INT3'</b>                  | -3375.011045 | 1.094421 | 0.926153  | -3373.732509 | -      |
| <b>TS2'</b>                   | -4607.591261 | 1.647388 | 1.417829  | -4605.687348 | -272.7 |
| <b>INT4'</b>                  | -4607.592612 | 1.649391 | 1.417716  | -4605.700186 | -      |
| <b>TS3'</b>                   | -4607.600836 | 1.647356 | 1.406251  | -4605.682881 | -64.9  |
| <b>3'</b>                     | -1580.529507 | 0.716149 | 0.59903   | -1579.732784 | -      |
| <b>3-DME</b>                  | -1887.978889 | 0.830523 | 0.694314  | -1887.046698 | -      |
| <b>TS6</b>                    | -4915.053918 | 1.760971 | 1.499943  | -4913.003002 | -62.6  |
| HClO <sub>4</sub>             | -761.288775  | 0.031817 | -0.002547 | -761.2531547 | -      |
| <b>INT5</b>                   | -2523.746025 | 1.125299 | 0.959451  | -2522.518578 | -      |
| <sup>-</sup> ClO <sub>4</sub> | -760.7902275 | 0.020019 | -0.01261  | -760.8324357 | -      |
| HNBn <sub>2</sub>             | -597.2483449 | 0.269938 | 0.213608  | -596.9369326 | -      |
| <b>TS7</b>                    | -2523.702176 | 1.120885 | 0.953815  | -2522.474032 | -285.7 |
| <b>4</b>                      | -1135.705789 | 0.469687 | 0.385668  | -1135.137046 | -      |
| <b>TS8</b>                    | -4915.056385 | 1.759875 | 1.501069  | -4913.001033 | -57.3  |
| <b>INT6</b>                   | -2523.737286 | 1.123833 | 0.95895   | -2522.517199 | -      |
| <b>TS9</b>                    | -2523.697545 | 1.121589 | 0.956975  | -2522.467772 | -273.4 |
| <b>5'</b>                     | -1135.724103 | 0.470178 | 0.389378  | -1135.15499  | -      |
| <b>3'-DME</b>                 | -1735.563242 | 0.804512 | 0.669433  | -1734.70397  | -      |
| <b>TS6'</b>                   | -4762.635239 | 1.735611 | 1.482829  | -4760.659629 | -56.7  |
| <b>INT5'</b>                  | -2371.316051 | 1.09898  | 0.934756  | -2370.167411 | -      |
| <b>TS7'</b>                   | -2371.277999 | 1.095269 | 0.934265  | -2370.129793 | -240.7 |

|              |              |          |          |              |        |
|--------------|--------------|----------|----------|--------------|--------|
| <b>4'</b>    | -983.279654  | 0.444219 | 0.366248 | -982.788770  | -      |
| <b>TS8'</b>  | -4762.631498 | 1.735705 | 1.471804 | -4760.64902  | -56.9  |
| <b>INT6'</b> | -2371.312899 | 1.09945  | 0.934953 | -2370.168922 | -      |
| <b>TS9'</b>  | -2371.275732 | 1.095169 | 0.932085 | -2370.121173 | -149.5 |
| <b>5</b>     | -983.300172  | 0.444354 | 0.367061 | -982.809354  | -      |

<sup>1</sup>The electronic energy calculated by B3-LYP in gas. <sup>2</sup>The thermal correction to enthalpy calculated by B3-LYP in gas. <sup>3</sup>The thermal correction to Gibbs free energy calculated by B3-LYP in gas. <sup>4</sup>The electronic energy calculated by M06 in dimethyl ether solvent. <sup>5</sup>The B3-LYP calculated imaginary frequencies for the transition states.

#### 4. B3-LYP calculated geometries for all the optimized compounds and transition states.

|             |             |             |             |   |             |             |             |
|-------------|-------------|-------------|-------------|---|-------------|-------------|-------------|
| <b>INT1</b> |             |             |             | C | 1.52827600  | 1.54325800  | 4.39305400  |
| Pd          | 0.80636600  | 0.36497100  | -0.48960800 | C | 1.17182500  | 1.58854800  | 3.04537600  |
| P           | 0.25896400  | -2.03888700 | -0.15960600 | C | 1.95347900  | 1.86661200  | -1.28525500 |
| P           | -0.58670800 | 1.71521300  | 0.87389000  | C | 2.12664500  | 0.56437600  | -3.41926300 |
| O           | -2.18664300 | -0.80942200 | 0.65427500  | C | 0.82628000  | 1.17074300  | -3.89018600 |
| N           | 2.44640100  | 0.74310400  | -1.96112500 | C | -0.40240100 | 0.53165000  | -3.66711100 |
| C           | -1.42234200 | -2.59893000 | -0.67553800 | C | -1.59308100 | 1.10164500  | -4.12011100 |
| C           | -1.70825100 | -3.69409000 | -1.50208700 | C | -1.57060700 | 2.31722900  | -4.80959700 |
| C           | -3.03107600 | -4.00415300 | -1.82118800 | C | -0.35259200 | 2.95771200  | -5.04592600 |
| C           | -4.08374100 | -3.24495400 | -1.30570200 | C | 0.83669400  | 2.38600200  | -4.58820400 |
| C           | -3.84243800 | -2.16035600 | -0.45416400 | C | 3.83453500  | 0.23575900  | -1.68588400 |
| C           | -2.50579300 | -1.86580600 | -0.17358500 | C | 4.33069100  | 0.38489000  | -0.26942200 |
| C           | -4.92538500 | -1.33654500 | 0.25561700  | C | 4.14941100  | -0.64669700 | 0.66162100  |
| C           | -4.39647500 | 0.09760100  | 0.40617300  | C | 4.63788300  | -0.52188200 | 1.96366200  |
| C           | -3.02266000 | 0.28361900  | 0.60877600  | C | 5.31640800  | 0.63680800  | 2.34916400  |
| C           | -2.42707900 | 1.54284500  | 0.77348900  | C | 5.51325100  | 1.66664900  | 1.42548300  |
| C           | -3.27993300 | 2.65891100  | 0.80493400  | C | 5.02801200  | 1.53702700  | 0.12317900  |
| C           | -4.65351700 | 2.50597900  | 0.63147200  | H | -0.90162500 | -4.29877600 | -1.90216600 |
| C           | -5.20189500 | 1.24049300  | 0.41569000  | H | -3.24448400 | -4.84946000 | -2.46850200 |
| C           | -5.13641100 | -1.93388500 | 1.67756400  | H | -5.10195900 | -3.51578900 | -1.56284800 |
| C           | -6.26411300 | -1.37687800 | -0.50226100 | H | -2.86631800 | 3.65067600  | 0.94643200  |
| C           | 0.38370900  | -2.69724600 | 1.55779000  | H | -5.29986900 | 3.37807800  | 0.65422800  |
| C           | -0.19072100 | -3.92822900 | 1.91703700  | H | -6.27202100 | 1.14968700  | 0.26506100  |
| C           | -0.06361200 | -4.41090400 | 3.21918800  | H | -5.48834700 | -2.96893200 | 1.60576000  |
| C           | 0.63400300  | -3.67058800 | 4.17800700  | H | -5.88406000 | -1.35026600 | 2.22609700  |
| C           | 1.20389900  | -2.44560300 | 3.83007500  | H | -4.20689200 | -1.92879600 | 2.25537200  |
| C           | 1.07935100  | -1.96112000 | 2.52583000  | H | -6.17487300 | -0.96103000 | -1.51145600 |
| C           | 1.39333700  | -3.13395100 | -1.13107200 | H | -7.03357000 | -0.81623300 | 0.03611800  |
| C           | 1.39008700  | -3.05926100 | -2.53672900 | H | -6.63241900 | -2.40365300 | -0.58255900 |
| C           | 2.28614400  | -3.81206000 | -3.29632600 | H | -0.74059200 | -4.50875600 | 1.18212300  |
| C           | 3.21592900  | -4.64287500 | -2.66422900 | H | -0.51228500 | -5.36354900 | 3.48643700  |
| C           | 3.23200700  | -4.72283500 | -1.27198900 | H | 0.72628700  | -4.04662100 | 5.19306200  |
| C           | 2.32565600  | -3.97910300 | -0.50984700 | H | 1.73225900  | -1.85555800 | 4.57345500  |
| C           | -0.37491600 | 3.51161000  | 0.48195000  | H | 1.51279700  | -1.00203100 | 2.26416200  |
| C           | -0.64804200 | 3.94121500  | -0.83009200 | H | 0.66700800  | -2.42771000 | -3.04612200 |
| C           | -0.50171400 | 5.28193600  | -1.18219500 | H | 2.25463800  | -3.75422700 | -4.38102700 |
| C           | -0.06862100 | 6.21385600  | -0.23398400 | H | 3.91576400  | -5.22728600 | -3.25436700 |
| C           | 0.20757100  | 5.79656500  | 1.06748500  | H | 3.94456700  | -5.37255100 | -0.77160300 |
| C           | 0.05165600  | 4.45397800  | 1.42761400  | H | 2.34223300  | -4.06789300 | 0.57138800  |
| C           | -0.18186300 | 1.59995000  | 2.66653900  | H | -0.98903400 | 3.22777400  | -1.57669000 |
| C           | -1.16853500 | 1.54830900  | 3.66083600  | H | -0.72385600 | 5.59763100  | -2.19774000 |
| C           | -0.80768200 | 1.48664200  | 5.00908100  | H | 0.04917900  | 7.25798900  | -0.50934800 |
| C           | 0.53808100  | 1.48849300  | 5.37817800  | H | 0.53832500  | 6.51497600  | 1.81230700  |

|          |             |             |             |    |             |             |             |
|----------|-------------|-------------|-------------|----|-------------|-------------|-------------|
| H        | 0.25778100  | 4.14999600  | 2.44823900  | C  | -4.57381000 | -2.65330300 | 0.04715600  |
| H        | -2.21874100 | 1.55969200  | 3.38757800  | H  | -1.98275700 | 0.66288900  | 0.33896600  |
| H        | -1.58171700 | 1.44322600  | 5.77001000  | H  | -2.17613200 | -0.61543600 | -0.97603100 |
| H        | 0.81505700  | 1.44820900  | 6.42784400  | H  | -0.95010700 | -1.62380600 | 2.77353200  |
| H        | 2.57856300  | 1.54548500  | 4.67115400  | H  | -1.44408400 | 0.03856800  | 2.44322400  |
| H        | 1.94991500  | 1.61474800  | 2.28640100  | H  | -4.00592000 | 0.55273000  | 2.43510700  |
| H        | 1.38673900  | 2.57494300  | -1.87992700 | H  | -6.08737900 | 0.17779900  | 3.71810500  |
| H        | 2.61643300  | 2.30430600  | -0.54449200 | H  | -6.30245100 | -1.80865900 | 5.19816000  |
| H        | 2.95728200  | 1.00807600  | -3.98447700 | H  | -4.41447400 | -3.41379000 | 5.39610300  |
| H        | 2.14911600  | -0.51397800 | -3.60093800 | H  | -2.32901100 | -3.03925400 | 4.11523800  |
| H        | -0.43238800 | -0.41598700 | -3.13692500 | H  | -1.16173500 | -3.08729600 | 0.07427900  |
| H        | -2.53574100 | 0.59121100  | -3.94441800 | H  | -2.19598400 | -3.28795400 | 1.48989100  |
| H        | -2.49636600 | 2.75551700  | -5.17123300 | H  | -2.09266500 | -3.98876500 | -1.85780200 |
| H        | -0.32510900 | 3.89489200  | -5.59437800 | H  | -4.03407300 | -4.56230900 | -3.28767100 |
| H        | 1.78342100  | 2.88428300  | -4.78467500 | H  | -6.33454800 | -3.95215700 | -2.56712900 |
| H        | 3.83241500  | -0.81697400 | -1.98247600 | H  | -6.67041300 | -2.71575400 | -0.42891900 |
| H        | 4.50734500  | 0.77137400  | -2.36985600 | H  | -4.73240200 | -2.12827600 | 0.98469500  |
| H        | 3.64621600  | -1.55997700 | 0.35661400  | Pd | 0.33725000  | 0.01740000  | -0.61581800 |
| H        | 4.49919400  | -1.33494400 | 2.67062000  | P  | 0.90161500  | 1.69704300  | 1.12529600  |
| H        | 5.70924900  | 0.72874100  | 3.35793300  | P  | 2.11112600  | -1.82726000 | -0.53391200 |
| H        | 6.05833400  | 2.56118400  | 1.71263200  | O  | 3.23191300  | 0.92507300  | -0.40034700 |
| H        | 5.20784700  | 2.33063700  | -0.59892900 | C  | 1.95728300  | 2.84463900  | 0.13581800  |
|          |             |             |             | C  | 1.73697000  | 4.22118700  | 0.00387900  |
| <b>I</b> |             |             |             | C  | 2.57447200  | 4.99155900  | -0.80440700 |
| C        | -3.12057500 | -0.74485600 | 0.00028000  | C  | 3.65057200  | 4.40436300  | -1.47097600 |
| C        | -2.43899300 | 0.47464100  | 0.00032300  | C  | 3.92018200  | 3.03468600  | -1.34927200 |
| C        | -1.04509200 | 0.51418000  | 0.00009100  | C  | 3.04716600  | 2.28782400  | -0.55400600 |
| C        | -0.31987600 | -0.70307700 | -0.00010900 | C  | 5.14573100  | 2.33246400  | -1.94863000 |
| C        | -1.01876600 | -1.92602600 | -0.00006000 | C  | 4.75746400  | 0.88064900  | -2.26425600 |
| C        | -2.41031900 | -1.94684800 | 0.00006900  | C  | 3.83114900  | 0.23445800  | -1.43638500 |
| H        | -4.20732100 | -0.75379900 | 0.00039400  | C  | 3.46044300  | -1.11418600 | -1.59015900 |
| H        | -2.98404100 | 1.41146300  | 0.00047500  | C  | 4.07416000  | -1.83549700 | -2.62518100 |
| H        | -0.45203800 | -2.85214100 | -0.00018200 | C  | 4.99583600  | -1.21995000 | -3.47039300 |
| H        | -2.93727900 | -2.89699000 | 0.00007100  | C  | 5.32693400  | 0.12345900  | -3.29462100 |
| C        | 1.10532900  | -0.70028000 | -0.00005200 | C  | 6.26711200  | 2.31249800  | -0.86902600 |
| C        | 2.32322700  | -0.67930700 | -0.00028500 | C  | 5.67272900  | 3.06712300  | -3.19477200 |
| C        | 3.74193300  | -0.72224400 | -0.00059300 | C  | 1.94697400  | 1.39962300  | 2.61744000  |
| H        | 4.18942600  | -1.71646400 | -0.00181900 | C  | 2.83992100  | 2.37512700  | 3.09284900  |
| C        | 4.54593400  | 0.35474500  | 0.00069700  | C  | 3.56897300  | 2.15604200  | 4.26177700  |
| H        | 5.62562100  | 0.24270400  | 0.00047700  | C  | 3.41395400  | 0.96352800  | 4.97292200  |
| H        | 4.14926200  | 1.36554400  | 0.00204800  | C  | 2.53403500  | -0.01313100 | 4.50547200  |
| C        | -0.29779500 | 1.82789900  | 0.00034400  | C  | 1.80922200  | 0.20253000  | 3.33184400  |
| H        | 0.36026000  | 1.86824500  | 0.88389200  | C  | -0.46271000 | 2.75805500  | 1.78216000  |
| H        | 0.36238700  | 1.86739000  | -0.88162400 | C  | -1.46679000 | 3.19218800  | 0.89650600  |
| O        | -1.22275400 | 2.90527000  | -0.00128200 | C  | -2.55431900 | 3.93521600  | 1.35947800  |
| H        | -0.71429500 | 3.72893200  | 0.00230300  | C  | -2.66381800 | 4.24544300  | 2.71726800  |
|          |             |             |             | C  | -1.67798000 | 3.81371700  | 3.60581300  |
|          |             |             |             | C  | -0.58430800 | 3.07643200  | 3.14526100  |
|          |             |             |             | C  | 1.80192700  | -3.46964600 | -1.33524700 |
|          |             |             |             | C  | 0.78915000  | -3.57598100 | -2.30181900 |
|          |             |             |             | C  | 0.55431800  | -4.78395200 | -2.96249300 |
|          |             |             |             | C  | 1.31907600  | -5.91051000 | -2.65437800 |
|          |             |             |             | C  | 2.32426600  | -5.81983000 | -1.68928700 |
|          |             |             |             | C  | 2.56811300  | -4.60969400 | -1.03713300 |
|          |             |             |             | C  | 2.95647500  | -2.34083700 | 1.02606700  |
|          |             |             |             | C  | 4.29184200  | -2.03200000 | 1.31492700  |
|          |             |             |             | C  | 4.87791300  | -2.46949000 | 2.50606200  |
|          |             |             |             | C  | 4.14284100  | -3.22907800 | 3.41598100  |
|          |             |             |             | C  | 2.80890200  | -3.54268000 | 3.13749600  |
|          |             |             |             | C  | 2.21875900  | -3.09338400 | 1.95730800  |
|          |             |             |             | H  | 0.90731400  | 4.68715000  | 0.52510900  |
|          |             |             |             | H  | 2.39372400  | 6.05723900  | -0.90774700 |
|          |             |             |             | H  | 4.29150700  | 5.02850700  | -2.08364800 |

## INT2

|   |             |             |             |
|---|-------------|-------------|-------------|
| N | -1.90968000 | -1.31412200 | 0.93545900  |
| C | -1.79621900 | -0.35348300 | 0.00597500  |
| C | -1.76110600 | -1.00437600 | 2.37302400  |
| C | -3.03117300 | -1.23182100 | 3.16881300  |
| C | -4.09749100 | -0.32476500 | 3.07152100  |
| C | -5.27009200 | -0.53341200 | 3.79669400  |
| C | -5.38983900 | -1.64920800 | 4.63125900  |
| C | -4.33099300 | -2.55065400 | 4.74211100  |
| C | -3.15705700 | -2.34058700 | 4.01430000  |
| C | -2.08191100 | -2.73438600 | 0.55361800  |
| C | -3.27513700 | -3.00933300 | -0.34571100 |
| C | -3.09373600 | -3.69305800 | -1.55445500 |
| C | -4.18864500 | -4.02314500 | -2.35736100 |
| C | -5.47958200 | -3.67362900 | -1.95631700 |
| C | -5.66872500 | -2.98431600 | -0.75244000 |

|            |             |             |             |   |             |             |             |
|------------|-------------|-------------|-------------|---|-------------|-------------|-------------|
| H          | 3.82037800  | -2.87809300 | -2.77909600 | C | -6.12830600 | -0.21501700 | -1.79020800 |
| H          | 5.45858300  | -1.78989700 | -4.27036800 | C | -5.52935100 | 1.05825500  | -1.17525400 |
| H          | 6.04534300  | 0.57966700  | -3.96641100 | C | -4.29540700 | 0.96559700  | -0.52082300 |
| H          | 6.55446600  | 3.33522200  | -0.60088700 | C | -3.65386600 | 2.05668200  | 0.08631900  |
| H          | 7.15231200  | 1.79162200  | -1.25067000 | C | -4.34214400 | 3.27991300  | 0.10225600  |
| H          | 5.93560600  | 1.80242400  | 0.04122000  | C | -5.58484000 | 3.39982600  | -0.51716400 |
| H          | 4.92315400  | 3.10747900  | -3.99209900 | C | -6.16053700 | 2.30655000  | -1.16656600 |
| H          | 6.56857600  | 2.57706500  | -3.58617000 | C | -6.89568400 | -0.98342600 | -0.67508100 |
| H          | 5.96849500  | 4.09008200  | -2.94567900 | C | -7.10759200 | 0.10934300  | -2.93248100 |
| H          | 2.96278800  | 3.30936300  | 2.55352700  | C | -1.76226200 | -2.64406700 | 0.85728200  |
| H          | 4.25540800  | 2.91887700  | 4.61857700  | C | -2.82850500 | -3.55721100 | 0.87827600  |
| H          | 3.98093100  | 0.79571600  | 5.88429400  | C | -3.17010800 | -4.21942900 | 2.05885100  |
| H          | 2.42084300  | -0.94956400 | 5.04292700  | C | -2.44951000 | -3.98299300 | 3.23144300  |
| H          | 1.14725600  | -0.57297600 | 2.96174400  | C | -1.39005400 | -3.07407800 | 3.22183600  |
| H          | -1.40254400 | 2.95526100  | -0.16121000 | C | -1.05330400 | -2.40576800 | 2.04338100  |
| H          | -3.31655800 | 4.26173400  | 0.65744300  | C | -0.05928700 | -3.04412300 | -1.43444600 |
| H          | -3.51202100 | 4.81932600  | 3.07961800  | C | 0.71149100  | -2.66815600 | -2.54794700 |
| H          | -1.75390100 | 4.05295000  | 4.66288300  | C | 1.58485000  | -3.57229700 | -3.15373100 |
| H          | 0.17413100  | 2.75578200  | 3.85084900  | C | 1.71726900  | -4.86687200 | -2.64473700 |
| H          | 0.18785100  | -2.70641000 | -2.54260900 | C | 0.96252100  | -5.25158800 | -1.53547700 |
| H          | -0.22519100 | -4.84381900 | -3.71743000 | C | 0.07587000  | -4.35120600 | -0.93795500 |
| H          | 1.13448200  | -6.85215000 | -3.16336300 | C | -1.40278100 | 3.60459700  | 1.01663400  |
| H          | 2.92555700  | -6.69112500 | -1.44527200 | C | -1.31224500 | 4.47382300  | -0.08708400 |
| H          | 3.35871300  | -4.55518900 | -0.29603000 | C | -0.88847900 | 5.79235400  | 0.07130900  |
| H          | 4.88446800  | -1.46201200 | 0.60685200  | C | -0.53424100 | 6.26889400  | 1.33666300  |
| H          | 5.91568800  | -2.22449900 | 2.71391900  | C | -0.62260000 | 5.41929700  | 2.43881500  |
| H          | 4.60547000  | -3.58007200 | 4.33403100  | C | -1.05794300 | 4.09953200  | 2.28323800  |
| H          | 2.23192400  | -4.14208200 | 3.83681500  | C | -2.14201800 | 1.18964900  | 2.43969400  |
| H          | 1.18410000  | -3.35500700 | 1.74506200  | C | -3.40321800 | 0.98999400  | 3.01775400  |
| C          | -6.79058700 | 3.77456000  | -2.37123500 | C | -3.51410200 | 0.52136900  | 4.32904400  |
| C          | -6.61769400 | 2.39091700  | -2.45530300 | C | -2.36970500 | 0.26355500  | 5.08416200  |
| C          | -5.34131700 | 1.82917600  | -2.46107400 | C | -1.10759800 | 0.46283800  | 4.51842000  |
| C          | -4.21353100 | 2.68272300  | -2.37553200 | C | -0.99492200 | 0.90768500  | 3.20141700  |
| C          | -4.39976400 | 4.07816500  | -2.29387500 | H | -1.98697900 | -3.49087900 | -3.10562500 |
| C          | -5.68149000 | 4.62007600  | -2.29179800 | H | -4.02820200 | -3.50265800 | -4.50096600 |
| H          | -7.79353000 | 4.19209300  | -2.37267600 | H | -5.91308800 | -2.01127500 | -3.97866100 |
| H          | -7.47415900 | 1.73015900  | -2.52213300 | H | -3.89821200 | 4.14441500  | 0.58194200  |
| H          | -3.52738600 | 4.72336400  | -2.24515300 | H | -6.10432200 | 4.35318900  | -0.50209400 |
| H          | -5.81413800 | 5.69655700  | -2.23468500 | H | -7.11904600 | 2.43196100  | -1.65812700 |
| C          | -2.89374800 | 2.14510800  | -2.37511800 | H | -7.31480100 | -1.91362700 | -1.07463100 |
| C          | -1.76025800 | 1.69299800  | -2.38987800 | H | -7.71746900 | -0.37039700 | -0.28842300 |
| C          | -0.42903400 | 1.20392200  | -2.43009800 | H | -6.23596300 | -1.23727100 | 0.16076200  |
| H          | 0.34799400  | 1.96530600  | -2.49904600 | H | -6.61806500 | 0.65475700  | -3.74613400 |
| C          | -0.09666000 | -0.11987500 | -2.77076000 | H | -7.94589400 | 0.71009500  | -2.56829700 |
| H          | 0.86631400  | -0.32501000 | -3.23060500 | H | -7.54214300 | -0.80701300 | -3.34219800 |
| H          | -0.89373000 | -0.81578600 | -3.02222700 | H | -3.39109600 | -3.75662800 | -0.02850700 |
| C          | -5.14152300 | 0.33509000  | -2.55917900 | H | -3.99878700 | -4.92214100 | 2.06058600  |
| H          | -4.53638000 | 0.11206800  | -3.45430300 | H | -2.71741300 | -4.49922400 | 4.14903600  |
| H          | -4.55230500 | -0.00729500 | -1.69141100 | H | -0.83636800 | -2.87074300 | 4.13386800  |
| O          | -6.39329300 | -0.32185700 | -2.60856500 | H | -0.24684200 | -1.67891200 | 2.05096700  |
| H          | -6.21613900 | -1.27464300 | -2.59309000 | H | 0.62555300  | -1.66228100 | -2.94419500 |
|            |             |             |             | H | 2.16147900  | -3.26424200 | -4.02178700 |
|            |             |             |             | H | 2.40022000  | -5.57101700 | -3.11160200 |
|            |             |             |             | H | 1.05505200  | -6.25753700 | -1.13553100 |
|            |             |             |             | H | -0.51366800 | -4.67394900 | -0.08650100 |
|            |             |             |             | H | -1.59888100 | 4.12688700  | -1.07434100 |
|            |             |             |             | H | -0.83971500 | 6.44854500  | -0.79340600 |
|            |             |             |             | H | -0.20386100 | 7.29623300  | 1.46138100  |
|            |             |             |             | H | -0.36619000 | 5.78234900  | 3.43032800  |
|            |             |             |             | H | -1.13434000 | 3.46524700  | 3.15861500  |
|            |             |             |             | H | -4.30233600 | 1.20779700  | 2.45079400  |
|            |             |             |             | H | -4.49873500 | 3.69570000  | 4.76224000  |
|            |             |             |             | H | -2.45937500 | -0.08752800 | 6.10830600  |
| <b>TS1</b> |             |             |             |   |             |             |             |
| Pd         | -0.52990800 | 0.58768900  | -0.75426900 |   |             |             |             |
| P          | -1.21156300 | -1.79293900 | -0.68751700 |   |             |             |             |
| P          | -1.93090100 | 1.84750900  | 0.72856300  |   |             |             |             |
| O          | -3.65064900 | -0.24864900 | -0.44202600 |   |             |             |             |
| C          | -2.69567000 | -1.94005400 | -1.78254600 |   |             |             |             |
| C          | -2.80415700 | -2.81822900 | -2.86924200 |   |             |             |             |
| C          | -3.95697900 | -2.82473400 | -3.65570000 |   |             |             |             |
| C          | -5.02463300 | -1.97618200 | -3.35775200 |   |             |             |             |
| C          | -4.96729600 | -1.09918900 | -2.26791800 |   |             |             |             |
| C          | -3.78661400 | -1.09936500 | -1.51998000 |   |             |             |             |

|             |             |             |             |   |             |             |             |
|-------------|-------------|-------------|-------------|---|-------------|-------------|-------------|
| H           | -0.21073400 | 0.27146100  | 5.10174200  | C | -2.15500200 | -3.66572900 | -2.14258700 |
| H           | -0.00756800 | 1.05973600  | 2.77264800  | C | -3.27831400 | -4.45785100 | -2.38152400 |
| C           | 7.23205900  | 1.42096700  | -4.01089600 | C | -4.46772300 | -4.23433200 | -1.68543100 |
| C           | 6.54098500  | 2.44687700  | -3.36404000 | C | -4.56528900 | -3.20902100 | -0.73833500 |
| C           | 5.29457600  | 2.21820800  | -2.77482700 | C | -3.43035600 | -2.41527500 | -0.54899400 |
| C           | 4.73483600  | 0.92283000  | -2.84286300 | C | -5.78533100 | -2.94487300 | 0.15578100  |
| C           | 5.44188600  | -0.10624500 | -3.48904400 | C | -5.86820100 | -1.42853300 | 0.37656600  |
| C           | 6.67952500  | 0.14182000  | -4.07959200 | C | -4.67049600 | -0.70769400 | 0.45088400  |
| H           | 8.19932900  | 1.62340200  | -4.46169300 | C | -4.61246000 | 0.68156500  | 0.61549800  |
| H           | 6.96111000  | 3.44428800  | -3.30809000 | C | -5.82573100 | 1.36193200  | 0.81469100  |
| H           | 4.99983700  | -1.09827700 | -3.54150000 | C | -7.03277800 | 0.66730600  | 0.79043300  |
| H           | 7.20698000  | -0.66020000 | -4.58797700 | C | -7.05387400 | -0.70839900 | 0.54909900  |
| C           | 3.45112800  | 0.61880000  | -2.21509200 | C | -5.54166300 | -3.63348600 | 1.53023200  |
| C           | 2.21944500  | 0.81186700  | -2.31675300 | C | -7.08010100 | -3.50565300 | -0.45731700 |
| C           | 0.86049400  | 1.05691200  | -2.48332600 | C | -0.29586900 | -2.23932600 | 0.88326200  |
| H           | 0.37958500  | 0.54773500  | -3.31826000 | C | -0.36542100 | -3.61978000 | 1.13942900  |
| C           | 0.20580900  | 2.18928400  | -1.89897400 | C | 0.01189800  | -4.12533200 | 2.38306500  |
| H           | -0.62348600 | 2.62530100  | -2.45320000 | C | 0.45291400  | -3.26051800 | 3.38862300  |
| H           | 0.79701300  | 2.90590900  | -1.33333200 | C | 0.51279800  | -1.88760800 | 3.14676900  |
| C           | 4.53761800  | 3.35127800  | -2.11334600 | C | 0.13960300  | -1.37940700 | 1.90055000  |
| H           | 3.65351100  | 3.59513100  | -2.72636600 | C | 0.49938400  | -2.13302900 | -1.95208800 |
| H           | 4.15423000  | 3.02504700  | -1.13182100 | C | 0.37601100  | -1.72438400 | -3.29296200 |
| O           | 5.39156400  | 4.47383600  | -1.97811300 | C | 1.28201500  | -2.16425500 | -4.25621700 |
| H           | 4.85367200  | 5.23118200  | -1.70570600 | C | 2.33600300  | -3.00815700 | -3.89109900 |
| N           | 3.43962000  | -0.96736700 | 0.45857500  | C | 2.47351400  | -3.40991200 | -2.56283700 |
| C           | 4.20170000  | -0.27178300 | -0.36566300 | C | 1.55773700  | -2.97930200 | -1.59655800 |
| C           | 3.25593600  | -2.42447400 | 0.28617300  | C | -3.54786700 | 3.28848300  | 0.15606500  |
| C           | 3.71500600  | -3.20663700 | 1.50202600  | C | -4.21560900 | 3.57252100  | -1.04940200 |
| C           | 5.06117200  | -3.18335200 | 1.89624000  | C | -4.65299300 | 4.86502000  | -1.33200000 |
| C           | 5.48603600  | -3.91239000 | 3.00609400  | C | -4.42083800 | 5.89900000  | -0.41942200 |
| C           | 4.56954800  | -4.67714600 | 3.73446000  | C | -3.75887800 | 5.62782300  | 0.77718500  |
| C           | 3.22956000  | -4.70773500 | 3.34802200  | C | -3.32759000 | 4.32920000  | 1.06831700  |
| C           | 2.80398600  | -3.97374500 | 2.23751800  | C | -2.28277400 | 1.59669500  | 2.16398100  |
| C           | 2.56861900  | -0.30734600 | 1.46169700  | C | -3.00303100 | 1.15960800  | 3.28427200  |
| C           | 3.16347500  | 0.93728000  | 2.07961700  | C | -2.43132300 | 1.21869800  | 4.55753900  |
| C           | 2.62285400  | 2.19802600  | 1.79558200  | C | -1.14036200 | 1.72070200  | 4.72666000  |
| C           | 3.15332400  | 3.34705300  | 2.38940200  | C | -0.41608800 | 2.16099300  | 3.61516100  |
| C           | 4.23582700  | 3.24356600  | 3.26341200  | C | -0.97848700 | 2.09441200  | 2.33988000  |
| C           | 4.78361100  | 1.98883600  | 3.54901600  | H | -1.23496300 | -3.86229200 | -2.68068600 |
| C           | 4.24848100  | 0.84199300  | 2.96444600  | H | -3.22298000 | -5.26275800 | -3.10813200 |
| H           | 4.90804600  | -0.82400000 | -0.97264700 | H | -5.32070600 | -4.87491800 | -1.88083900 |
| H           | 4.47095600  | 0.73184500  | -0.06227600 | H | -5.82778700 | 2.43519400  | 0.96554300  |
| H           | 2.20033600  | -2.62157200 | 0.07708200  | H | -7.96501900 | 1.20263000  | 0.94233400  |
| H           | 3.81766000  | -2.71383100 | -0.60640500 | H | -8.00911500 | -1.21991000 | 0.50387900  |
| H           | 5.78182500  | -2.59712800 | 1.33023200  | H | -5.44705000 | -4.71700600 | 1.39905300  |
| H           | 6.53193400  | -3.89126700 | 3.29876900  | H | -6.38202900 | -3.43810800 | 2.20556400  |
| H           | 4.90196800  | -5.24834200 | 4.59644300  | H | -4.62715500 | -3.26598900 | 2.00602300  |
| H           | 2.51354400  | -5.30254900 | 3.90804500  | H | -7.30255700 | -3.05152500 | -1.42864800 |
| H           | 1.75907300  | -4.00313500 | 1.93791800  | H | -7.93112000 | -3.33413200 | 0.20817100  |
| H           | 1.61131400  | -0.07825700 | 0.97237400  | H | -7.00707100 | -4.58896400 | -0.59012200 |
| H           | 2.38125900  | -1.06237300 | 2.23114100  | H | -0.71759200 | -4.30057100 | 0.37025800  |
| H           | 1.77636000  | 2.27851300  | 1.11753800  | H | -0.04332100 | -5.19430900 | 2.56823500  |
| H           | 2.71373000  | 4.31639000  | 2.17210200  | H | 0.73980500  | -3.65646400 | 4.35874500  |
| H           | 4.65111000  | 4.13476400  | 3.72514800  | H | 0.83799800  | -1.20664200 | 3.92792300  |
| H           | 5.62278400  | 1.90485600  | 4.23359900  | H | 0.17355000  | -0.30948800 | 1.72801800  |
| H           | 4.67092900  | -0.13359100 | 3.19454500  | H | -0.44258500 | -1.07202100 | -3.58790700 |
|             |             |             |             | H | 1.16658300  | -1.84955900 | -5.28978100 |
|             |             |             |             | H | 3.04493900  | -3.34864800 | -4.64046900 |
|             |             |             |             | H | 3.29685900  | -4.05170600 | -2.26484000 |
|             |             |             |             | H | 1.68748700  | -3.30063900 | -0.56930200 |
|             |             |             |             | H | -4.40832100 | 2.77594600  | -1.76455300 |
|             |             |             |             | H | -5.17455300 | 5.06589600  | -2.26357000 |
|             |             |             |             | H | -4.75858500 | 6.90722100  | -0.64088000 |
| <b>INT3</b> |             |             |             |   |             |             |             |
| Pd          | -1.15957900 | 0.86002600  | -1.00987700 |   |             |             |             |
| P           | -0.77772000 | -1.54620800 | -0.75360900 |   |             |             |             |
| P           | -2.99288500 | 1.55055800  | 0.46419300  |   |             |             |             |
| O           | -3.46587000 | -1.36546500 | 0.34728400  |   |             |             |             |
| C           | -2.21625900 | -2.61551200 | -1.21479600 |   |             |             |             |



|   |             |             |             |   |             |             |             |
|---|-------------|-------------|-------------|---|-------------|-------------|-------------|
| H | -3.58300600 | 6.42345400  | 1.49574200  | C | -0.79774400 | -0.21540900 | -0.91784200 |
| H | -2.82973200 | 4.13329800  | 2.01195900  | H | -0.83602500 | -1.24368700 | -1.30539700 |
| H | -4.01092200 | 0.77461800  | 3.16732300  | N | -1.41809000 | -0.15157900 | 0.40073400  |
| H | -2.99964800 | 0.87466800  | 5.41691700  | C | -1.42915700 | -1.43077300 | 1.11448200  |
| H | -0.70005700 | 1.76978900  | 5.71849600  | H | -2.03742000 | -1.28551700 | 2.01641800  |
| H | 0.59175200  | 2.54801100  | 3.73999100  | C | -2.70019300 | 0.57002200  | 0.45558300  |
| H | -0.39536900 | 2.43028300  | 1.48492900  | H | -2.51888300 | 1.57996300  | 0.07334400  |
| C | 4.97964200  | 4.20705300  | -2.99673600 | H | -2.95778600 | 0.68104800  | 1.51589500  |
| C | 4.10781100  | 4.66405700  | -2.00820700 | H | -1.39321300 | 0.39768600  | -1.61451400 |
| C | 3.13333500  | 3.83126500  | -1.44412100 | N | 0.60862400  | 0.20981600  | -0.94676800 |
| C | 3.05698400  | 2.49049000  | -1.88049100 | C | 1.36876800  | -0.50023800 | -1.98714800 |
| C | 3.92805200  | 2.04147400  | -2.88229000 | H | 1.11734700  | -1.56397900 | -1.89379100 |
| C | 4.88409000  | 2.88987000  | -3.44160000 | H | 1.06906700  | -0.19528200 | -3.00935400 |
| H | 5.72389400  | 4.87780800  | -3.41576800 | C | 0.75677800  | 1.66473900  | -1.08544700 |
| H | 4.18031200  | 5.69462300  | -1.66942900 | H | 0.15146100  | 2.04125400  | -1.93473300 |
| H | 3.85192000  | 1.01390100  | -3.22459700 | H | 1.80408700  | 1.85307300  | -1.34731100 |
| H | 5.54780800  | 2.52069600  | -4.21815400 | C | 2.87136600  | -0.34468800 | -1.84702100 |
| C | 2.07894000  | 1.50410700  | -1.29510000 | C | 3.50503000  | -0.66155500 | -0.63614900 |
| C | 0.87670300  | 1.48732300  | -1.83333800 | C | 3.65465400  | 0.07770200  | -2.92690000 |
| C | -0.14011300 | 1.97366900  | -2.63202000 | C | 4.89016400  | -0.55798900 | -0.51471800 |
| H | -0.30876800 | 1.55985400  | -3.62617600 | H | 2.90316200  | -0.98697000 | 0.20685300  |
| C | -1.12918200 | 2.78451900  | -2.01037600 | C | 5.04358300  | 0.17935000  | -2.80825200 |
| H | -2.01875400 | 3.05856100  | -2.56859800 | H | 3.17327200  | 0.32919500  | -3.86982500 |
| H | -0.83780700 | 3.48300700  | -1.23063000 | C | 5.66497200  | -0.13814000 | -1.60044000 |
| C | 2.16733300  | 4.43510200  | -0.44755500 | H | 5.36771500  | -0.80907500 | 0.42914600  |
| H | 2.49182200  | 5.45955800  | -0.22823200 | H | 5.63600600  | 0.51047600  | -3.65739900 |
| H | 1.16493500  | 4.50203300  | -0.89716000 | H | 6.74465300  | -0.05833200 | -1.50350500 |
| O | 2.09863100  | 3.66645500  | 0.76318400  | C | 0.43199400  | 2.48011800  | 0.15183900  |
| H | 1.82223900  | 4.26496500  | 1.47348600  | C | -0.47222800 | 3.54544500  | 0.08831400  |
| N | 3.89218900  | 0.30453000  | 0.10694500  | C | 1.10187600  | 2.24077600  | 1.36033900  |
| C | 2.50145200  | 0.63887300  | -0.07581000 | C | -0.71628800 | 4.35023200  | 1.20622800  |
| C | 4.79578200  | 1.34197600  | 0.61629300  | H | -0.98656700 | 3.75423900  | -0.84797100 |
| C | 5.82390500  | 0.83057500  | 1.61253000  | C | 0.86245300  | 3.03998900  | 2.47630300  |
| C | 5.42453400  | 0.28784700  | 2.84194800  | C | -0.05056200 | 4.09809700  | 2.40458900  |
| C | 6.36814700  | -0.14593900 | 3.77066200  | H | -1.42430400 | 5.17220800  | 1.13623300  |
| C | 7.73320100  | -0.04325600 | 3.48421200  | H | -0.23529700 | 4.72133300  | 3.27570500  |
| C | 8.14314900  | 0.49560200  | 2.26537100  | H | -1.92865000 | -2.22414400 | 0.52807100  |
| C | 7.19141800  | 0.92964900  | 1.33813900  | C | -3.87984100 | -0.05047500 | -0.28777500 |
| C | 4.48244000  | -0.67085100 | -0.80414500 | C | -4.21588700 | 0.37214600  | -1.58231200 |
| C | 4.86114600  | -2.01493100 | -0.18904700 | C | -4.65667400 | -1.06196500 | 0.29772300  |
| C | 4.20742700  | -2.52352000 | 0.93817900  | C | -5.27698900 | -0.20858900 | -2.27962400 |
| C | 4.51199400  | -3.79687600 | 1.42487000  | H | -3.64803000 | 1.17650700  | -2.04508900 |
| C | 5.47820200  | -4.58111800 | 0.79127600  | C | -5.71771400 | -1.64778500 | -0.39436100 |
| C | 6.14316500  | -4.07855900 | -0.32976500 | H | -4.43710400 | -1.38568600 | 1.31244400  |
| C | 5.83503600  | -2.80530500 | -0.81287200 | C | -6.02890400 | -1.22542900 | -1.68865300 |
| H | 2.17013600  | 1.19900200  | 0.80415100  | H | -5.52078600 | 0.13863300  | -3.28049200 |
| H | 1.91899600  | -0.28549000 | -0.11632600 | H | -6.30708000 | -2.42815000 | 0.08042300  |
| H | 5.32791900  | 1.84637500  | -0.20612300 | H | -6.85726100 | -1.67770400 | -2.22748600 |
| H | 4.17241300  | 2.10612900  | 1.09267400  | C | -0.06254000 | -1.93305900 | 1.54487100  |
| H | 4.36355600  | 0.20109500  | 3.06514300  | C | 0.69653900  | -1.21445400 | 2.47967200  |
| H | 6.04281900  | -0.56340900 | 4.72012900  | C | 0.43212000  | -3.15464000 | 1.07720400  |
| H | 8.46959900  | -0.38154500 | 4.20799600  | C | 1.91786100  | -1.70810000 | 2.93488300  |
| H | 9.20159100  | 0.57858900  | 2.03352300  | H | 0.32311100  | -0.25990300 | 2.83949600  |
| H | 7.51642300  | 1.35359000  | 0.39014500  | C | 1.65945900  | -3.65258800 | 1.52686900  |
| H | 3.76886600  | -0.86715100 | -1.61689200 | H | -0.15177900 | -3.72753400 | 0.35965500  |
| H | 5.37162800  | -0.24029700 | -1.28712900 | C | 2.40420300  | -2.93164100 | 2.45956400  |
| H | 3.47070000  | -1.90730400 | 1.44414700  | H | 2.49122400  | -1.14312900 | 3.66582300  |
| H | 3.99598200  | -4.17354100 | 2.30446500  | H | 2.02799600  | -4.60345000 | 1.15074500  |
| H | 5.71962800  | -5.56932700 | 1.17311300  | H | 3.35504600  | -3.31809500 | 2.81718600  |
| H | 6.90920000  | -4.67263000 | -0.82132600 | H | 1.80724000  | 1.41720400  | 1.41546800  |
| H | 6.36296500  | -2.41862200 | -1.68289200 | H | 1.39248100  | 2.84355100  | 3.40529200  |

|    |             |             |             |   |             |             |             |
|----|-------------|-------------|-------------|---|-------------|-------------|-------------|
| Pd | 0.61353200  | 0.80974500  | -0.07464200 | H | 5.40006200  | -0.59277700 | 4.67868600  |
| P  | 2.50279900  | 1.64130100  | 1.22871700  | H | 5.03870700  | 0.73810100  | 2.63905400  |
| P  | 0.17655000  | 2.40310100  | -1.98560500 | H | -2.63221600 | 2.91772100  | -1.40605500 |
| O  | 1.75420900  | 4.09710100  | -0.14866000 | H | -4.73403600 | 2.64467100  | -2.66945200 |
| C  | 2.17766100  | 3.28540700  | 2.02574100  | H | -4.70541000 | 1.65098000  | -4.95358600 |
| C  | 2.27235800  | 3.53357300  | 3.40238900  | H | -2.53992200 | 0.95727500  | -5.96299200 |
| C  | 2.07298700  | 4.82092600  | 3.90298900  | H | -0.43145200 | 1.28547800  | -4.73146000 |
| C  | 1.81412500  | 5.88622300  | 3.03932500  | H | 1.95312000  | 4.04878200  | -3.77477900 |
| C  | 1.72703200  | 5.68630400  | 1.65684600  | H | 3.72771500  | 3.42209500  | -5.37231600 |
| C  | 1.87758600  | 4.37442500  | 1.19678300  | H | 4.29620000  | 1.03076400  | -5.74157000 |
| C  | 1.58199800  | 6.80448800  | 0.61454200  | H | 3.07512600  | -0.74116800 | -4.46551700 |
| C  | 0.75868500  | 6.24716900  | -0.55396900 | H | 1.34700400  | -0.12437400 | -2.84798400 |
| C  | 0.88252500  | 4.88693000  | -0.86317300 | C | -0.10168900 | -6.32576800 | -0.30962300 |
| C  | 0.15139100  | 4.25308200  | -1.87781500 | C | 0.01444400  | -5.54284100 | -1.45977800 |
| C  | -0.65177500 | 5.06682200  | -2.69367300 | C | 0.42183600  | -4.20260300 | -1.40521200 |
| C  | -0.75691600 | 6.43387800  | -2.44659200 | C | 0.74573800  | -3.64225400 | -0.14395300 |
| C  | -0.08089500 | 7.01126600  | -1.36984800 | C | 0.59632400  | -4.42924000 | 1.00632400  |
| C  | 3.00289500  | 7.16463500  | 0.09092600  | C | 0.17570300  | -5.75917800 | 0.93254200  |
| C  | 0.93980500  | 8.06812600  | 1.21353700  | H | -0.41834900 | -7.36183600 | -0.38568700 |
| C  | 4.14212100  | 1.95189900  | 0.43210600  | H | -0.22872500 | -5.97802400 | -2.42687600 |
| C  | 5.10598100  | 2.79129500  | 1.01787100  | H | 0.82772700  | -3.98944700 | 1.97227700  |
| C  | 6.33429700  | 3.00310400  | 0.39146200  | H | 0.07521700  | -6.34735300 | 1.84051800  |
| C  | 6.61446700  | 2.38729200  | -0.83132600 | C | 1.28125300  | -2.24232900 | -0.01153900 |
| C  | 5.65896900  | 1.56383200  | -1.42720600 | C | 0.44785900  | -1.23876200 | 0.26396000  |
| C  | 4.42911600  | 1.34937600  | -0.80064700 | C | -0.85486100 | -0.77736500 | 0.52805900  |
| C  | 2.88171400  | 0.61282400  | 2.72025200  | H | -1.09395900 | -0.59223000 | 1.57598000  |
| C  | 1.79401700  | 0.09446400  | 3.44488600  | C | -1.90135200 | -0.51676600 | -0.41797200 |
| C  | 1.99976500  | -0.64232100 | 4.61097800  | H | -2.56267500 | 0.32260900  | -0.23869000 |
| C  | 3.29923500  | -0.88931800 | 5.06290000  | H | -1.68426400 | -0.69825700 | -1.46650100 |
| C  | 4.38661100  | -0.39187000 | 4.34449700  | C | 0.39560200  | -3.39408900 | -2.69573500 |
| C  | 4.18081800  | 0.35923300  | 3.18363200  | H | 0.00442900  | -4.03784100 | -3.49864300 |
| C  | -1.37203700 | 2.11625600  | -2.97274600 | H | -0.30287400 | -2.55536700 | -2.59108700 |
| C  | -2.60548100 | 2.47880000  | -2.40110200 | O | 1.61685800  | -2.78754900 | -3.09325200 |
| C  | -3.79516900 | 2.32435400  | -3.11336400 | H | 2.29612300  | -3.47985800 | -3.18786500 |
| C  | -3.77942900 | 1.77058000  | -4.39814200 | N | 3.76230400  | -2.95889200 | 0.26927600  |
| C  | -2.56536200 | 1.38246000  | -4.96333100 | C | 2.78579700  | -2.02304400 | -0.27645300 |
| C  | -1.36877600 | 1.56297600  | -4.26144600 | C | 3.99376300  | -4.22797700 | -0.42000600 |
| C  | 1.51423100  | 2.01313800  | -3.19652900 | C | 4.45464700  | -4.09187400 | -1.86014700 |
| C  | 2.19963400  | 3.00133200  | -3.91722200 | C | 5.37129400  | -3.10415100 | -2.24579600 |
| C  | 3.20202500  | 2.64583800  | -4.82295900 | C | 5.82252400  | -3.02735600 | -3.56418500 |
| C  | 3.52228400  | 1.30239400  | -5.02869700 | C | 5.36802300  | -3.93777000 | -4.52270000 |
| C  | 2.84213700  | 0.30915500  | -4.31863700 | C | 4.46024600  | -4.93057200 | -4.15038700 |
| C  | 1.85210500  | 0.66325800  | -3.40096800 | C | 4.00608800  | -5.00351800 | -2.82853900 |
| H  | 2.50264200  | 2.72291300  | 4.08412400  | C | 3.82319700  | -3.06878700 | 1.72584600  |
| H  | 2.13957700  | 4.99818500  | 4.97232000  | C | 5.22955900  | -3.31872700 | 2.24845100  |
| H  | 1.69166500  | 6.88161400  | 3.45222400  | C | 6.30320900  | -2.52388600 | 1.82083100  |
| H  | -1.21464600 | 4.62668000  | -3.50891000 | C | 7.58427200  | -2.72072100 | 2.33562700  |
| H  | -1.38251600 | 7.05097600  | -3.08468700 | C | 7.81393800  | -3.71788000 | 3.28870800  |
| H  | -0.20547800 | 8.07126900  | -1.17684300 | C | 6.75404400  | -4.51658800 | 3.71884700  |
| H  | 3.62534300  | 7.54037600  | 0.91071100  | C | 5.47237800  | -4.31709000 | 3.19835100  |
| H  | 2.93722800  | 7.94112800  | -0.67952600 | H | 2.92351300  | -1.99796700 | -1.35991500 |
| H  | 3.50098400  | 6.29246000  | -0.34391600 | H | 3.03081900  | -1.02875600 | 0.10614100  |
| H  | -0.06740900 | 7.87122100  | 1.59572200  | H | 4.79123800  | -4.73247700 | 0.14149600  |
| H  | 0.87683900  | 8.86458000  | 0.46640900  | H | 3.12534400  | -4.90540600 | -0.38279900 |
| H  | 1.54988000  | 8.46155500  | 2.03186500  | H | 5.72491800  | -2.39744400 | -1.50124200 |
| H  | 4.89556300  | 3.28585200  | 1.96162500  | H | 6.53766800  | -2.25810400 | -3.84437300 |
| H  | 7.07052200  | 3.65311100  | 0.85639000  | H | 5.72317700  | -3.87788000 | -5.54764200 |
| H  | 7.56970900  | 2.55831000  | -1.32005600 | H | 4.10686800  | -5.65034400 | -4.88407300 |
| H  | 5.85708300  | 1.09802200  | -2.38824000 | H | 3.30814500  | -5.78692000 | -2.53869000 |
| H  | 3.68417700  | 0.72937800  | -1.28708000 | H | 3.45182900  | -2.12455900 | 2.13724500  |
| H  | 0.78134500  | 0.27697000  | 3.09472800  | H | 3.15939500  | -3.85982700 | 2.11531300  |
| H  | 1.14687300  | -1.02483700 | 5.16545700  | H | 6.12484200  | -1.75266200 | 1.07639000  |
| H  | 3.46233700  | -1.47013000 | 5.96628300  | H | 8.40641100  | -2.09740600 | 1.99315200  |

|   |             |             |             |
|---|-------------|-------------|-------------|
| H | 8.81271900  | -3.87309400 | 3.68749800  |
| H | 6.92394300  | -5.29996600 | 4.45276800  |
| H | 4.65033100  | -4.94649900 | 3.53355600  |
| C | -4.16417900 | -1.47762400 | 1.01207100  |
| H | -5.03688000 | -2.13534300 | 1.03766700  |
| N | -3.43005400 | -1.75796800 | -0.28297300 |
| C | -4.18887200 | -1.46330000 | -1.54956200 |
| H | -3.95550500 | -0.42791900 | -1.81117900 |
| C | -2.76671900 | -3.10359900 | -0.24550800 |
| H | -2.07899900 | -3.07045000 | 0.60379900  |
| H | -2.14599000 | -3.15278700 | -1.14172900 |
| H | -3.48195800 | -1.81607300 | 1.79602300  |
| N | -4.55436600 | -0.09980400 | 1.21995500  |
| C | -6.01369500 | 0.09667000  | 1.33195600  |
| H | -6.48239700 | -0.51700300 | 0.55892800  |
| H | -6.39433200 | -0.27098600 | 2.29811700  |
| C | -3.79407600 | 0.60914400  | 2.28654800  |
| H | -4.09943300 | 1.65776500  | 2.23801300  |
| H | -2.73492900 | 0.58294200  | 2.01868900  |
| C | -6.45984400 | 1.53499700  | 1.13960000  |
| C | -5.81287500 | 2.39575000  | 0.24299300  |
| C | -7.58263900 | 2.00938100  | 1.82996300  |
| C | -6.27672000 | 3.69686200  | 0.04197100  |
| H | -4.93492500 | 2.03814500  | -0.28643800 |
| C | -8.05632300 | 3.30678900  | 1.62295500  |
| H | -8.09540900 | 1.35499800  | 2.53188100  |
| C | -7.40319300 | 4.15623400  | 0.72864300  |
| H | -5.75698800 | 4.35597500  | -0.64923100 |
| H | -8.93029700 | 3.65497200  | 2.16653900  |
| H | -7.76439100 | 5.16879200  | 0.57255800  |
| C | -3.97360800 | 0.09127100  | 3.70582500  |
| C | -3.09081800 | -0.85448900 | 4.25028000  |
| C | -5.02757300 | 0.55351900  | 4.50974300  |
| C | -3.26884900 | -1.34594600 | 5.54526700  |
| H | -2.23922800 | -1.19750300 | 3.66512000  |
| C | -5.20893600 | 0.06571400  | 5.80478200  |
| C | -4.33360600 | -0.89044600 | 6.32430900  |
| H | -2.57113300 | -2.07506400 | 5.94873200  |
| H | -4.47241300 | -1.26713400 | 7.33373600  |
| H | -3.72420300 | -2.09004800 | -2.31872500 |
| C | -3.62086800 | -4.35200700 | -0.16752600 |
| C | -4.13501200 | -4.81634700 | 1.05298600  |
| C | -3.85642600 | -5.11006900 | -1.32398600 |
| C | -4.89823900 | -5.98335600 | 1.10751500  |
| H | -3.93072600 | -4.27041200 | 1.97053200  |
| C | -4.61406100 | -6.28099600 | -1.27249800 |
| H | -3.44126600 | -4.78214400 | -2.27408800 |
| C | -5.14396300 | -6.71618200 | -0.05631600 |
| H | -5.29156000 | -6.32615000 | 2.06037700  |
| H | -4.78736400 | -6.85303800 | -2.17958100 |
| H | -5.73416500 | -7.62702300 | -0.01263900 |
| C | -5.70535600 | -1.60464000 | -1.61687300 |
| C | -6.41971800 | -0.53018000 | -2.17104100 |
| C | -6.42239600 | -2.75097800 | -1.24080900 |
| C | -7.80311400 | -0.59035800 | -2.34152700 |
| H | -5.88435500 | 0.36543200  | -2.47240600 |
| C | -7.80874000 | -2.80723200 | -1.39835400 |
| H | -5.90937800 | -3.60670200 | -0.82276300 |
| C | -8.50519500 | -1.73050600 | -1.94958900 |
| H | -8.33016900 | 0.25686300  | -2.77101700 |
| H | -8.34286800 | -3.70278300 | -1.09323300 |
| H | -9.58323000 | -1.78039400 | -2.07305000 |
| H | -5.69958400 | 1.31566100  | 4.12307400  |

|             |             |             |             |
|-------------|-------------|-------------|-------------|
| H           | -6.02856200 | 0.43980100  | 6.41213600  |
| <b>INT4</b> |             |             |             |
| Pd          | 0.28395100  | 0.79177200  | -0.26251800 |
| P           | 1.97705500  | 2.08350300  | 0.98731500  |
| P           | -0.66520100 | 2.27069400  | -2.04084500 |
| O           | 0.42625500  | 4.28139500  | -0.20213300 |
| C           | 1.26304200  | 3.54920700  | 1.88411700  |
| C           | 1.40671100  | 3.77385000  | 3.26159200  |
| C           | 0.88005800  | 4.92308100  | 3.85342900  |
| C           | 0.23043700  | 5.88526900  | 3.07842900  |
| C           | 0.08077900  | 5.71276400  | 1.69820800  |
| C           | 0.57969300  | 4.52642100  | 1.14703600  |
| C           | -0.49459600 | 6.76689800  | 0.74149800  |
| C           | -1.22168700 | 6.02201000  | -0.38480000 |
| C           | -0.70987700 | 4.78510800  | -0.79510000 |
| C           | -1.29583600 | 3.99686800  | -1.79679700 |
| C           | -2.39215000 | 4.54348000  | -2.48312000 |
| C           | -2.90241800 | 5.79041900  | -2.12648300 |
| C           | -2.33758900 | 6.50994100  | -1.07172000 |
| C           | 0.69402600  | 7.55899900  | 0.12254400  |
| C           | -1.42381600 | 7.75643500  | 1.46589700  |
| C           | 3.45400000  | 2.85580700  | 0.18146600  |
| C           | 4.13472600  | 3.94893400  | 0.74441700  |
| C           | 5.25440600  | 4.48930800  | 0.11108000  |
| C           | 5.70923200  | 3.94925900  | -1.09443600 |
| C           | 5.03597500  | 2.86935800  | -1.66631400 |
| C           | 3.91428100  | 2.32915100  | -1.03358300 |
| C           | 2.68211500  | 1.13644500  | 2.41492200  |
| C           | 1.80531400  | 0.31749600  | 3.14869400  |
| C           | 2.25511100  | -0.38807700 | 4.26418100  |
| C           | 3.59576800  | -0.30527800 | 4.65182800  |
| C           | 4.47787500  | 0.49091400  | 3.92179000  |
| C           | 4.02374800  | 1.21421200  | 2.81501300  |
| C           | -2.05985700 | 1.52959900  | -3.02323700 |
| C           | -3.33037800 | 1.43972300  | -2.42621500 |
| C           | -4.40788500 | 0.87997000  | -3.11351100 |
| C           | -4.23063600 | 0.36827800  | -4.40309100 |
| C           | -2.96999000 | 0.43170100  | -4.99796700 |
| C           | -1.89623200 | 1.01548000  | -4.31882000 |
| C           | 0.65910900  | 2.45198300  | -3.31817300 |
| C           | 0.85559000  | 3.62977200  | -4.05293400 |
| C           | 1.86213500  | 3.70215300  | -5.01868600 |
| C           | 2.67621800  | 2.59699400  | -5.27225700 |
| C           | 2.48724900  | 1.41706400  | -4.54830700 |
| C           | 1.49248000  | 1.34887900  | -3.57168200 |
| H           | 1.93499100  | 3.05039100  | 3.87215600  |
| H           | 0.99712900  | 5.08090000  | 4.92173700  |
| H           | -0.14716700 | 6.78194500  | 3.55762600  |
| H           | -2.86213300 | 3.98364000  | -3.28378300 |
| H           | -3.75260500 | 6.19943900  | -2.66444000 |
| H           | -2.76863600 | 7.46594200  | -0.79489600 |
| H           | 1.25252700  | 8.08004200  | 0.90818100  |
| H           | 0.32277100  | 8.30271900  | -0.59153800 |
| H           | 1.38554900  | 6.89419800  | -0.40422600 |
| H           | -2.28274900 | 7.25145700  | 1.92061900  |
| H           | -1.79652500 | 8.51736400  | 0.77402600  |
| H           | -0.88224100 | 8.29275800  | 2.25056100  |
| H           | 3.79079900  | 4.38110400  | 1.67926500  |
| H           | 5.77080400  | 5.33373400  | 0.55950900  |
| H           | 6.57960800  | 4.37347300  | -1.58736200 |
| H           | 5.37235300  | 2.45248400  | -2.61137300 |
| H           | 3.38352000  | 1.50579200  | -1.49858100 |

|   |             |             |             |   |             |             |             |
|---|-------------|-------------|-------------|---|-------------|-------------|-------------|
| H | 0.76470300  | 0.23792000  | 2.84653300  | H | 4.08756000  | -3.01957100 | 1.58859600  |
| H | 1.56034600  | -1.00611700 | 4.82719300  | H | 6.02632200  | -0.11489900 | 0.11370800  |
| H | 3.95131500  | -0.86456300 | 5.51274300  | H | 8.30160400  | 0.50037000  | 0.88188100  |
| H | 5.52598200  | 0.54343400  | 4.20058800  | H | 9.41139700  | -0.81720600 | 2.67802100  |
| H | 4.72581400  | 1.82647100  | 2.26005600  | H | 8.22549600  | -2.75617100 | 3.69167000  |
| H | -3.49038200 | 1.84155100  | -1.42873700 | H | 5.94742800  | -3.35557100 | 2.92362800  |
| H | -5.38571100 | 0.86105000  | -2.64159700 | C | -3.69393200 | -2.05724400 | 1.12835200  |
| H | -5.07024700 | -0.05932400 | -4.94479700 | H | -4.35360600 | -2.88211500 | 1.39075200  |
| H | -2.82205200 | 0.04857200  | -6.00417400 | N | -2.88873200 | -2.59019200 | -0.10748300 |
| H | -0.93233700 | 1.08333100  | -4.81170800 | C | -3.75111500 | -3.00475700 | -1.31945100 |
| H | 0.22360000  | 4.49378800  | -3.87318000 | H | -3.68183200 | -2.16860700 | -2.01478300 |
| H | 2.00579300  | 4.62366600  | -5.57607000 | C | -1.99315300 | -3.74595400 | 0.37086700  |
| H | 3.45467500  | 2.65478100  | -6.02791800 | H | -1.36622500 | -3.31554800 | 1.15146200  |
| H | 3.12152600  | 0.55443300  | -4.73561900 | H | -1.33747900 | -3.96266800 | -0.47257400 |
| H | 1.36279000  | 0.43626700  | -2.99361300 | H | -2.92137900 | -1.96774900 | 1.89669000  |
| C | 1.13299200  | -6.37681800 | 0.00343900  | N | -4.42815900 | -0.84915100 | 0.95412100  |
| C | 1.02573100  | -5.74649500 | -1.23533400 | C | -5.88388600 | -0.97255800 | 1.27275800  |
| C | 1.13079200  | -4.35349800 | -1.35894200 | H | -6.26821900 | -1.79883400 | 0.67209900  |
| C | 1.36858700  | -3.57308000 | -0.20382300 | H | -6.03323100 | -1.24545700 | 2.32738500  |
| C | 1.45631200  | -4.21892200 | 1.03977100  | C | -3.76495800 | 0.38202300  | 1.42297500  |
| C | 1.33952900  | -5.60510800 | 1.14831200  | H | -4.47671000 | 1.19558800  | 1.25590700  |
| H | 1.05272500  | -7.45763800 | 0.07509400  | H | -2.91640100 | 0.59984500  | 0.76722400  |
| H | 0.86218200  | -6.34116000 | -2.13143300 | C | -6.69785200 | 0.27232100  | 0.98754800  |
| H | 1.63645300  | -3.61741500 | 1.92640300  | C | -7.14182600 | 0.56010500  | -0.31078000 |
| H | 1.41708600  | -6.08062800 | 2.12232000  | C | -7.05651600 | 1.14158700  | 2.02677400  |
| C | 1.55044700  | -2.08321800 | -0.28304800 | C | -7.91396000 | 1.69352900  | -0.56676000 |
| C | 0.55240900  | -1.25536600 | 0.04773500  | H | -6.89898800 | -0.12575100 | -1.11681600 |
| C | -0.81395200 | -1.04786700 | 0.26493700  | C | -7.82773100 | 2.27839100  | 1.77475000  |
| H | -1.12517100 | -0.78864500 | 1.27851300  | H | -6.72876100 | 0.92733000  | 3.04146700  |
| C | -1.92579400 | -1.46751300 | -0.65778100 | C | -8.25631600 | 2.55798200  | 0.47644200  |
| H | -2.62149600 | -0.66487500 | -0.90224000 | H | -8.25974000 | 1.89717100  | -1.57673000 |
| H | -1.52284200 | -1.87036600 | -1.58985700 | H | -8.09779300 | 2.93970200  | 2.59319000  |
| C | 0.99042500  | -3.74329200 | -2.73622700 | H | -8.86174100 | 3.43807600  | 0.27901200  |
| H | 0.20470100  | -4.28199200 | -3.29001900 | C | -3.26531800 | 0.45000000  | 2.86607600  |
| H | 0.68221700  | -2.69148500 | -2.65287200 | C | -3.75691100 | -0.34408200 | 3.91123800  |
| O | 2.23674500  | -3.85557400 | -3.42525000 | C | -2.27709500 | 1.40174100  | 3.16625200  |
| H | 2.11486600  | -3.52478000 | -4.32948500 | C | -3.27991200 | -0.18797800 | 5.21671700  |
| N | 4.14394200  | -2.17209000 | -0.35917100 | H | -4.51891400 | -1.09312300 | 3.72085300  |
| C | 2.89970800  | -1.57034200 | -0.82682800 | C | -1.80677700 | 1.56751400  | 4.46880700  |
| C | 4.56372400  | -3.43277600 | -0.98122300 | C | -2.30720100 | 0.76986500  | 5.50125700  |
| C | 6.03591600  | -3.49953300 | -1.36398700 | H | -3.67708300 | -0.81434500 | 6.01104200  |
| C | 6.62329300  | -2.48977200 | -2.13784700 | H | -1.94170700 | 0.89414200  | 6.51661300  |
| C | 7.94865600  | -2.59049300 | -2.55684900 | H | -3.20707000 | -3.84224100 | -1.76475100 |
| C | 8.71227300  | -3.70933900 | -2.21027600 | C | -2.65231600 | -5.01438500 | 0.85020600  |
| C | 8.13847600  | -4.72096800 | -1.44064600 | C | -3.08359900 | -5.15902200 | 2.17882400  |
| C | 6.80952400  | -4.61296800 | -1.02220800 | C | -2.75599400 | -6.11645800 | -0.01232100 |
| C | 4.39032100  | -2.08786200 | 1.07863300  | C | -3.64985200 | -6.35632600 | 2.61736000  |
| C | 5.82488300  | -1.76990700 | 1.47365400  | H | -2.96361100 | -4.33760500 | 2.88060200  |
| C | 6.50524200  | -0.68432400 | 0.90544700  | C | -3.31818600 | -7.31640700 | 0.42470900  |
| C | 7.78622500  | -0.34232000 | 1.33601100  | H | -2.37799600 | -6.04177900 | -1.02860000 |
| C | 8.41107300  | -1.08156900 | 2.34550400  | C | -3.77552900 | -7.43542100 | 1.73849100  |
| C | 7.74509400  | -2.16723500 | 2.91444300  | H | -3.97914500 | -6.45162600 | 3.64800200  |
| C | 6.46128200  | -2.50605500 | 2.47784000  | H | -3.39092600 | -8.15858600 | -0.25714500 |
| H | 2.88990200  | -1.68146600 | -1.91881100 | H | -4.21089600 | -8.36934400 | 2.08180500  |
| H | 2.93089700  | -0.49609400 | -0.61536500 | C | -5.22263300 | -3.34767100 | -1.17868200 |
| H | 4.32985600  | -4.29212300 | -0.33005500 | C | -6.10369900 | -2.67016300 | -2.03792000 |
| H | 3.97134700  | -3.57055800 | -1.89065600 | C | -5.74336300 | -4.36281900 | -0.36082000 |
| H | 6.03369100  | -1.61426900 | -2.39822100 | C | -7.46250900 | -2.98521700 | -2.07581100 |
| H | 8.38961900  | -1.79682100 | -3.15517200 | H | -5.71641800 | -1.89352000 | -2.69263200 |
| H | 9.74615800  | -3.78814100 | -2.53570500 | C | -7.10653800 | -4.66417300 | -0.38422000 |
| H | 8.72460500  | -5.59238200 | -1.16019300 | H | -5.09635800 | -4.92791600 | 0.29672300  |
| H | 6.36796700  | -5.40467000 | -0.42018400 | C | -7.97105000 | -3.98042200 | -1.24053700 |
| H | 3.74451200  | -1.29751700 | 1.47708700  | H | -8.12143100 | -2.45100800 | -2.75427400 |

|   |             |             |             |
|---|-------------|-------------|-------------|
| H | -7.48889200 | -5.44796600 | 0.26335000  |
| H | -9.02897500 | -4.22494700 | -1.26062600 |
| H | -1.87137600 | 2.02154000  | 2.36916200  |
| H | -1.04635000 | 2.31635400  | 4.67103000  |

**TS3**

|   |             |             |             |
|---|-------------|-------------|-------------|
| C | -4.96067500 | -2.97868400 | -1.12260100 |
| C | -5.82096500 | -4.07459600 | -0.96056200 |
| C | -5.31886000 | -5.34763800 | -1.24603000 |
| C | -4.01298000 | -5.51710100 | -1.70451800 |
| C | -3.18649600 | -4.41034000 | -1.88094400 |
| C | -3.63518100 | -3.11316100 | -1.58467500 |
| H | -5.95197400 | -6.21928400 | -1.12341900 |
| H | -3.64194200 | -6.51247400 | -1.93034800 |
| H | -2.17142400 | -4.55688100 | -2.23466300 |
| C | -7.27377400 | -3.79219200 | -0.56067800 |
| C | -7.96222700 | -5.03381400 | 0.03164000  |
| H | -9.00507700 | -4.81693700 | 0.28023800  |
| H | -7.45750200 | -5.39081000 | 0.93582300  |
| H | -7.98401300 | -5.84905500 | -0.69724300 |
| C | -8.05445000 | -3.35693900 | -1.83596000 |
| H | -9.09272600 | -3.11735700 | -1.58034100 |
| H | -8.05580800 | -4.16718800 | -2.57363200 |
| H | -7.60372700 | -2.47412200 | -2.29931300 |
| C | -7.26294700 | -2.61507800 | 0.42183200  |
| C | -8.16323900 | -2.47065800 | 1.48159600  |
| C | -6.33929700 | -1.58266200 | 0.20006200  |
| C | -8.15915000 | -1.32391400 | 2.27485400  |
| H | -8.88573500 | -3.25233100 | 1.68818900  |
| C | -6.30634900 | -0.40944500 | 0.98218200  |
| C | -7.24640200 | -0.30336500 | 2.02053900  |
| H | -8.87171000 | -1.22385600 | 3.08827700  |
| H | -7.25157500 | 0.58380800  | 2.64483800  |
| O | -5.43061100 | -1.71022400 | -0.83466800 |
| P | -2.54827700 | -1.62353600 | -1.80927000 |
| P | -5.06364800 | 0.93683300  | 0.67406500  |
| C | -2.84869300 | -1.16558200 | -3.57527100 |
| C | -2.83858900 | -2.11182600 | -4.61368100 |
| C | -3.12591800 | 0.17489000  | -3.88172000 |
| C | -3.08661100 | -1.72051200 | -5.92901100 |
| H | -2.64451500 | -3.15816200 | -4.39637900 |
| C | -3.37708300 | 0.56551000  | -5.19942000 |
| H | -3.16523500 | 0.90245600  | -3.07464900 |
| C | -3.35515400 | -0.38070900 | -6.22434600 |
| H | -3.07652700 | -2.46198200 | -6.72318800 |
| H | -3.60047800 | 1.60552100  | -5.42146600 |
| H | -3.55427900 | -0.07976700 | -7.24918300 |
| C | -0.84189600 | -2.34851200 | -1.81371900 |
| C | -0.40265400 | -3.06699100 | -0.68463300 |
| C | 0.08091100  | -2.08883200 | -2.83939200 |
| C | 0.91047100  | -3.53085400 | -0.59794800 |
| H | -1.09706000 | -3.28302600 | 0.12327600  |
| C | 1.40074900  | -2.54249000 | -2.74462100 |
| H | -0.23053700 | -1.54167500 | -3.72347800 |
| C | 1.81934400  | -3.26832800 | -1.62877500 |
| H | 1.21981200  | -4.10906800 | 0.26913000  |
| H | 2.09590000  | -2.33567100 | -3.55391300 |
| H | 2.83934200  | -3.63754900 | -1.56495900 |
| C | -5.94297800 | 2.09371900  | -0.46850100 |
| C | -7.33754500 | 2.11227100  | -0.62087500 |
| C | -5.16957900 | 3.00234400  | -1.21025600 |
| C | -7.94240100 | 3.02052300  | -1.49291900 |
| H | -7.95493300 | 1.41626300  | -0.06167600 |

|    |             |             |             |
|----|-------------|-------------|-------------|
| C  | -5.77549000 | 3.91787200  | -2.07087900 |
| H  | -4.08645300 | 2.98055800  | -1.11395000 |
| C  | -7.16483400 | 3.92629600  | -2.21645500 |
| H  | -9.02319800 | 3.01960100  | -1.60469900 |
| H  | -5.16413800 | 4.61774100  | -2.63451300 |
| H  | -7.63818400 | 4.63192200  | -2.89348400 |
| C  | -5.05980500 | 1.84661000  | 2.28924200  |
| C  | -5.62229000 | 3.12010000  | 2.45851500  |
| C  | -4.40935800 | 1.24531300  | 3.38237200  |
| C  | -5.53534500 | 3.77681100  | 3.69025900  |
| H  | -6.13453700 | 3.60224100  | 1.63221200  |
| C  | -4.33818000 | 1.89487500  | 4.61426300  |
| H  | -3.96325800 | 0.25982100  | 3.26936000  |
| C  | -4.89741100 | 3.16723100  | 4.77059500  |
| H  | -5.97727300 | 4.76311500  | 3.80374900  |
| H  | -3.84591000 | 1.40902900  | 5.45286500  |
| H  | -4.83804800 | 3.67594000  | 5.72875900  |
| pd | -3.18529900 | -0.00135100 | -0.29528400 |
| C  | -0.30764900 | 0.94105100  | 0.76890200  |
| H  | -1.04426100 | 1.69826200  | 0.52798800  |
| N  | -0.10231300 | 0.66308800  | 2.04889500  |
| C  | 0.49098900  | -0.64044100 | 2.44422100  |
| H  | 1.43053200  | -0.47248600 | 2.97821400  |
| C  | -0.64687800 | 1.53240300  | 3.12215700  |
| H  | -1.55099900 | 2.00542000  | 2.73016900  |
| H  | -0.97365800 | 0.85532700  | 3.91719600  |
| H  | -0.16949200 | 0.13759000  | 0.05775500  |
| H  | 0.73891400  | -1.16378800 | 1.51656700  |
| C  | 0.28169700  | 2.59072200  | 3.69113300  |
| C  | -0.17367100 | 3.91393700  | 3.77317900  |
| C  | 1.54677900  | 2.28214500  | 4.21504700  |
| C  | 0.61513500  | 4.90902100  | 4.35525100  |
| H  | -1.16057800 | 4.16609900  | 3.39158600  |
| C  | 2.34111600  | 3.27742400  | 4.78666500  |
| H  | 1.91691200  | 1.26113100  | 4.19652500  |
| C  | 1.87709700  | 4.59376000  | 4.86009500  |
| H  | 0.24222300  | 5.92756200  | 4.41196400  |
| H  | 3.31725000  | 3.02037400  | 5.18832200  |
| H  | 2.49245400  | 5.36471600  | 5.31477000  |
| C  | -0.44881200 | -1.48504300 | 3.28423200  |
| C  | -1.71712600 | -1.84187500 | 2.79879600  |
| C  | -0.04765000 | -1.94223700 | 4.54509300  |
| C  | -2.55959400 | -2.65048800 | 3.56237000  |
| H  | -2.05857600 | -1.47381600 | 1.82992000  |
| C  | -0.89043500 | -2.75668300 | 5.30694100  |
| H  | 0.93053800  | -1.66570900 | 4.93133200  |
| C  | -2.14660000 | -3.11284500 | 4.81619400  |
| H  | -3.53825400 | -2.92148900 | 3.17555600  |
| H  | -0.56501300 | -3.10714500 | 6.28222700  |
| H  | -2.80311900 | -3.74540100 | 5.40678800  |
| C  | 6.76580000  | -0.08161500 | -4.73206000 |
| C  | 7.23853100  | 0.95441100  | -3.92801000 |
| C  | 6.86649700  | 1.06750300  | -2.58220400 |
| C  | 6.00181400  | 0.09788200  | -2.02743200 |
| C  | 5.51553800  | -0.92980400 | -2.85159800 |
| C  | 5.89253800  | -1.02514300 | -4.19012500 |
| H  | 7.07228400  | -0.14802800 | -5.77194300 |
| H  | 7.91048100  | 1.69877100  | -4.34850600 |
| H  | 4.83952200  | -1.66435100 | -2.42306900 |
| H  | 5.50841800  | -1.83404700 | -4.80564600 |
| C  | 5.56904800  | 0.14059000  | -0.59017400 |
| C  | 4.29589300  | 0.27121300  | -0.29551800 |
| C  | 3.04313200  | 0.45753800  | 0.05112800  |

|   |             |             |             |          |             |             |             |
|---|-------------|-------------|-------------|----------|-------------|-------------|-------------|
| H | 2.39608200  | -0.40854100 | 0.18849600  | H        | 1.04397500  | 5.19035500  | -2.14305800 |
| C | 2.48784300  | 1.83179100  | 0.35024500  | C        | 3.38273800  | 6.13779900  | 0.79422700  |
| H | 2.35527300  | 1.95654500  | 1.43408300  | H        | 2.48751500  | 4.49508100  | 1.84914700  |
| H | 3.21189800  | 2.58758900  | 0.03119900  | C        | 3.40586500  | 6.88575700  | -0.38431100 |
| C | 7.40890900  | 2.22732900  | -1.77964600 | H        | 2.55596300  | 7.12374100  | -2.35244100 |
| H | 7.54892800  | 3.09076400  | -2.44570500 | H        | 4.02568700  | 6.40981200  | 1.62689700  |
| H | 6.69038000  | 2.52211200  | -1.00104400 | H        | 4.07155600  | 7.73937900  | -0.47721700 |
| O | 8.66074200  | 1.84178600  | -1.20046500 |          |             |             |             |
| H | 9.04121500  | 2.62022200  | -0.76239700 | <b>3</b> |             |             |             |
| N | 7.22836000  | -1.32460400 | 0.69974400  | C        | 0.74166400  | -4.92324400 | 0.59466700  |
| C | 6.59718900  | -0.01806400 | 0.55822400  | C        | 0.71532700  | -3.88986000 | 1.52919700  |
| C | 8.26723400  | -1.64274500 | -0.29238200 | C        | 0.66991100  | -2.54576600 | 1.13533000  |
| C | 9.29686000  | -2.62501100 | 0.23873600  | C        | 0.63725900  | -2.23437300 | -0.24288300 |
| C | 9.96825800  | -2.37278400 | 1.44396600  | C        | 0.67288300  | -3.28814100 | -1.17525300 |
| C | 10.94076300 | -3.25341300 | 1.91508100  | C        | 0.72604200  | -4.61963500 | -0.76841400 |
| C | 11.25943900 | -4.40360600 | 1.18658600  | H        | 0.77649400  | -5.95751800 | 0.92711800  |
| C | 10.59794500 | -4.66511400 | -0.01322300 | H        | 0.75265200  | -4.10699700 | 2.59217600  |
| C | 9.62179600  | -3.78063300 | -0.48033200 | H        | 0.63099300  | -3.05968500 | -2.23683200 |
| C | 6.31760200  | -2.43532700 | 0.95841700  | H        | 0.74579300  | -5.41303400 | -1.51110400 |
| C | 5.58620400  | -2.35010200 | 2.28697000  | C        | 0.52469800  | -0.83330600 | -0.75451000 |
| C | 6.22794900  | -1.87939000 | 3.44085100  | C        | -0.40589600 | -0.02606800 | -0.28720600 |
| C | 5.57079100  | -1.87844700 | 4.67180800  | C        | -1.34923500 | 0.78037100  | 0.13114800  |
| C | 4.26284700  | -2.36048500 | 4.77279100  | H        | -1.13332200 | 1.45879400  | 0.95874300  |
| C | 3.61435200  | -2.83341600 | 3.62972400  | C        | -2.75491600 | 0.84847200  | -0.46449900 |
| C | 4.27040600  | -2.81567400 | 2.39629600  | H        | -2.97009600 | 1.88847100  | -0.73360400 |
| H | 7.39666800  | 0.71365500  | 0.41472400  | H        | -2.78831900 | 0.25524400  | -1.38156300 |
| H | 6.08006400  | 0.21483100  | 1.49416100  | C        | 0.69606500  | -1.47485000 | 2.21833200  |
| H | 7.84177500  | -2.04068300 | -1.22885300 | H        | 1.15769900  | -0.56002500 | 1.82441300  |
| H | 8.75898800  | -0.69949800 | -0.55495900 | H        | -0.32486100 | -1.20934600 | 2.51701200  |
| H | 9.71940700  | -1.47912500 | 2.01013000  | O        | 1.33987200  | -1.90022400 | 3.41126000  |
| H | 11.45459400 | -3.04267600 | 2.84947100  | H        | 2.28104800  | -2.01670000 | 3.19577500  |
| H | 12.01803600 | -5.08958700 | 1.55355300  | N        | 2.64595100  | 0.41088600  | -1.55670600 |
| H | 10.83711300 | -5.55771700 | -0.58522000 | C        | 1.44060100  | -0.33562800 | -1.89878300 |
| H | 9.10877700  | -3.98848200 | -1.41716300 | C        | 3.89164900  | -0.31374700 | -1.28916600 |
| H | 5.57577900  | -2.56625100 | 0.14803900  | C        | 4.16443600  | -0.84609600 | 0.11676800  |
| H | 6.93057100  | -3.34522300 | 0.96079800  | C        | 4.63817900  | 0.00956200  | 1.12565100  |
| H | 7.24920300  | -1.51928700 | 3.36058500  | C        | 4.93088700  | -0.47472800 | 2.40097900  |
| H | 6.08570500  | -1.51474500 | 5.55731800  | C        | 4.77789600  | -1.83534400 | 2.68678600  |
| H | 3.76088000  | -2.38008800 | 5.73697500  | C        | 4.32563100  | -2.70134800 | 1.68712800  |
| H | 2.60260600  | -3.22539700 | 3.69881100  | C        | 4.01788800  | -2.20607800 | 0.41669200  |
| H | 3.76082500  | -3.18538200 | 1.50824000  | C        | 2.43124200  | 1.65547300  | -0.83342400 |
| N | 1.15784200  | 2.11768000  | -0.24603800 | C        | 3.45043700  | 2.73825500  | -1.15992800 |
| C | 0.70038100  | 3.52223000  | 0.03902800  | C        | 3.89437300  | 3.61596700  | -0.16335600 |
| H | -0.19123400 | 3.68250600  | -0.57544100 | C        | 4.78118400  | 4.65288400  | -0.46404200 |
| C | 0.93415400  | 1.65020100  | -1.64583200 | C        | 5.24197200  | 4.82107700  | -1.77045600 |
| H | -0.15429800 | 1.60744500  | -1.77448400 | C        | 4.80825600  | 3.94787200  | -2.77183000 |
| H | 1.29768600  | 0.61932100  | -1.68339400 | C        | 3.91848700  | 2.91717900  | -2.46868700 |
| H | 0.38491500  | 3.52572200  | 1.08654200  | H        | 1.75165900  | -1.19387400 | -2.50312100 |
| C | 1.52144200  | 2.43259500  | -2.80527200 | H        | 0.83307900  | 0.31109500  | -2.54336500 |
| C | 0.65958100  | 3.07365000  | -3.70622400 | H        | 3.93227500  | -1.14888100 | -1.99780400 |
| C | 2.90075400  | 2.46409700  | -3.05678700 | H        | 4.71343500  | 0.36398200  | -1.55398600 |
| C | 1.16059200  | 3.75370500  | -4.81842100 | H        | 4.80198000  | 1.06045300  | 0.90080600  |
| H | -0.41551500 | 3.03121000  | -3.54246100 | H        | 5.29658300  | 0.20422700  | 3.16687600  |
| C | 3.40393800  | 3.14607300  | -4.16424800 | H        | 5.02917300  | -2.21885700 | 3.67258500  |
| H | 3.58470200  | 1.93674700  | -2.39976900 | H        | 4.21519200  | -3.76295700 | 1.89130000  |
| C | 2.53700700  | 3.79761700  | -5.04522600 | H        | 3.66324400  | -2.88954600 | -0.35031600 |
| H | 0.47686000  | 4.24115200  | -5.50797400 | H        | 1.43466500  | 2.01801300  | -1.11791400 |
| H | 4.47483200  | 3.15200500  | -4.34683300 | H        | 2.39138900  | 1.51614500  | 0.26073900  |
| H | 2.93107600  | 4.32289500  | -5.91070300 | H        | 3.53811900  | 3.48909100  | 0.85724700  |
| C | 1.67596300  | 4.67648500  | -0.14547200 | H        | 5.11466000  | 5.32412700  | 0.32324500  |
| C | 1.69855700  | 5.44554900  | -1.31674900 | H        | 5.93558200  | 5.62359600  | -2.00701700 |
| C | 2.51858400  | 5.04888500  | 0.91443300  | H        | 5.16330800  | 4.07164400  | -3.79189800 |
| C | 2.55636500  | 6.53968500  | -1.43643700 | H        | 3.58197300  | 2.23199400  | -3.24191300 |

|   |             |             |             |   |             |             |             |
|---|-------------|-------------|-------------|---|-------------|-------------|-------------|
| N | -3.84350400 | 0.38535500  | 0.40832600  | C | 0.95703200  | -3.76503500 | 1.89487900  |
| C | -4.00298200 | 1.17074900  | 1.63595800  | C | 0.02432600  | -4.47209400 | 2.65258900  |
| H | -4.82343400 | 0.70643900  | 2.20001700  | C | -0.10498100 | -4.21731700 | 4.02129600  |
| C | -3.80087900 | -1.05712400 | 0.67236300  | C | 0.70875000  | -3.25676100 | 4.62148100  |
| H | -4.59034200 | -1.26627300 | 1.40690100  | C | 1.65127000  | -2.55413100 | 3.86461400  |
| H | -2.85049500 | -1.36927400 | 1.14079800  | C | 4.04008500  | -0.97125300 | 2.63745900  |
| H | -3.11705500 | 1.11835700  | 2.29576700  | C | 5.29722000  | -1.44874600 | 3.03656900  |
| C | -4.04709300 | -1.90081500 | -0.56590300 | C | 6.04718300  | -0.75464000 | 3.98801700  |
| C | -5.13202400 | -1.62725100 | -1.41126200 | C | 5.54552700  | 0.41329900  | 4.56396300  |
| C | -3.22209800 | -2.99185500 | -0.86093500 | C | 4.29251500  | 0.89366600  | 4.17724200  |
| C | -5.38748200 | -2.42977200 | -2.52259200 | C | 3.55091500  | 0.21353800  | 3.21096900  |
| H | -5.76569600 | -0.77195100 | -1.19349400 | H | 4.51949200  | 0.68077200  | -4.48276000 |
| C | -3.47855200 | -3.80047600 | -1.97139700 | H | 5.94991100  | -0.88484700 | -5.75001600 |
| H | -2.37055000 | -3.21011100 | -0.22140700 | H | 6.95777800  | -2.83815200 | -4.64306600 |
| C | -4.56193300 | -3.52224400 | -2.80520900 | H | 3.38604400  | -4.77772700 | 2.15871500  |
| H | -6.23251200 | -2.20500500 | -3.16872300 | H | 4.81773500  | -6.54114700 | 1.20207600  |
| H | -2.82429000 | -4.64176100 | -2.18487700 | H | 6.32399700  | -6.04869100 | -0.68248800 |
| H | -4.76186500 | -4.14839900 | -3.67097000 | H | 8.77622900  | -2.62198200 | -1.97728300 |
| C | -4.34719700 | 2.62691100  | 1.38013600  | H | 8.54683100  | -3.73566800 | -0.60997700 |
| C | -5.37208500 | 2.97160000  | 0.48690500  | H | 7.82492800  | -2.11527200 | -0.56836900 |
| C | -3.67870100 | 3.64993000  | 2.06167800  | H | 6.32238300  | -5.16064800 | -3.29897600 |
| C | -5.71873600 | 4.30668300  | 0.28383400  | H | 7.68509900  | -5.49717500 | -2.21097200 |
| H | -5.88496100 | 2.18133200  | -0.05415700 | H | 7.90607500  | -4.39941400 | -3.55676100 |
| C | -4.02699700 | 4.98889100  | 1.86479800  | H | 6.44261700  | 1.53124700  | -2.06514700 |
| H | -2.88048000 | 3.39659500  | 2.75649200  | H | 7.95393100  | 3.04528500  | -0.83210300 |
| C | -5.04815200 | 5.32080200  | 0.97429300  | H | 7.18572500  | 4.15142500  | 1.25780200  |
| H | -6.51472400 | 4.55790100  | -0.41264300 | H | 4.89299200  | 3.71169800  | 2.11698400  |
| H | -3.49666100 | 5.76994600  | 2.40345600  | H | 3.38418100  | 2.18009700  | 0.89566600  |
| H | -5.31951200 | 6.36127000  | 0.81636800  | H | 1.61639900  | 0.25313500  | -3.64898600 |

#### TS4

|    |            |             |             |   |             |             |             |
|----|------------|-------------|-------------|---|-------------|-------------|-------------|
| Pd | 1.88832000 | -0.50528700 | -0.24916400 | H | 0.58771900  | 1.68794500  | -5.37800900 |
| P  | 3.60467800 | 0.67518300  | -1.57522800 | H | 1.23344100  | 4.08460200  | -5.55848500 |
| P  | 2.98218500 | -1.86575800 | 1.41873400  | H | 2.94571800  | 5.01754800  | -4.01510100 |
| O  | 5.05436800 | -1.68001800 | -0.67308200 | H | 4.00500300  | 3.57893900  | -2.31480700 |
| C  | 4.69923400 | -0.39124200 | -2.61782800 | H | 1.05903400  | -3.98901300 | 0.83637600  |
| C  | 4.95735300 | -0.17364700 | -3.97907700 | H | -0.59676500 | -5.22453800 | 2.17389000  |
| C  | 5.76283700 | -1.05942000 | -4.69464300 | H | -0.82607400 | -4.77287400 | 4.61465000  |
| C  | 6.33385700 | -2.16611400 | -4.06397800 | H | 0.62371100  | -3.05739700 | 5.68617400  |
| C  | 6.12315700 | -2.40709700 | -2.70193200 | H | 2.28468200  | -1.82335800 | 4.35507400  |
| C  | 5.30245900 | -1.50437300 | -2.01816600 | H | 5.69239700  | -2.36544400 | 2.61175700  |
| C  | 6.78478500 | -3.53423800 | -1.89806300 | H | 7.02121400  | -1.13441900 | 4.28389900  |
| C  | 5.80255500 | -3.96011600 | -0.79795800 | H | 6.12754000  | 0.94608500  | 5.31088200  |
| C  | 4.98261900 | -2.98033600 | -0.22478400 | H | 3.88612700  | 1.79709000  | 4.62210600  |
| C  | 4.07670000 | -3.23463200 | 0.81497500  | H | 2.58087400  | 0.60306000  | 2.91458900  |
| C  | 4.04901000 | -4.53796300 | 1.33604000  | C | -4.00782300 | 4.39401700  | -3.49580100 |
| C  | 4.85639500 | -5.53589100 | 0.79325400  | C | -3.93866200 | 3.00513700  | -3.61116000 |
| C  | 5.71224400 | -5.25272300 | -0.27217000 | C | -2.98654800 | 2.26830500  | -2.90641100 |
| C  | 8.06333000 | -2.96305000 | -1.21827400 | C | -2.07389900 | 2.91352900  | -2.03555600 |
| C  | 7.18800900 | -4.71754800 | -2.79538400 | C | -2.15038300 | 4.31562200  | -1.95173400 |
| C  | 4.79971600 | 1.75634700  | -0.67721300 | C | -3.10182200 | 5.04585400  | -2.66384400 |
| C  | 6.09725100 | 2.00579000  | -1.15171200 | H | -4.75440200 | 4.95364700  | -4.05140300 |
| C  | 6.95084700 | 2.86340500  | -0.45621300 | H | -4.63009700 | 2.48013000  | -4.26648500 |
| C  | 6.51871200 | 3.48565100  | 0.71722900  | H | -1.45676700 | 4.86923900  | -1.33667600 |
| C  | 5.23061500 | 3.24301600  | 1.19693700  | H | -3.12365400 | 6.12671500  | -2.56079300 |
| C  | 4.37840900 | 2.37974600  | 0.50660700  | C | -0.99630100 | 2.16345500  | -1.32373300 |
| C  | 2.88459300 | 1.81124700  | -2.85161000 | C | -0.88408600 | 0.84327800  | -1.24492200 |
| C  | 1.91073800 | 1.29684300  | -3.72608300 | C | -0.16399400 | -0.35348400 | -1.09612200 |
| C  | 1.32763400 | 2.10576600  | -4.70033400 | H | -0.02478900 | -0.87049500 | -2.04859500 |
| C  | 1.69264300 | 3.45127300  | -4.80476300 | C | -0.07894100 | -1.16161600 | 0.08576200  |
| C  | 2.65210900 | 3.97426500  | -3.93790700 | H | -0.12118600 | -2.24129200 | -0.02587100 |
| C  | 3.25061700 | 3.15934800  | -2.97188200 | H | -0.50390200 | -0.79558400 | 1.01765300  |
| C  | 1.78752500 | -2.79736100 | 2.49043600  | C | -2.90369000 | 0.78405600  | -3.12765100 |
|    |            |             |             | H | -3.83905700 | 0.37842100  | -3.52864400 |
|    |            |             |             | H | -2.10542800 | 0.54111000  | -3.84130700 |

|   |             |             |             |            |             |             |             |
|---|-------------|-------------|-------------|------------|-------------|-------------|-------------|
| O | -2.56376800 | 0.09368400  | -1.92380100 | C          | -4.74080700 | -2.23263500 | -4.52488700 |
| H | -3.35365300 | 0.08574500  | -1.24443400 | C          | -7.50619400 | -1.96384900 | -4.55384800 |
| N | 0.01194900  | 3.30230600  | 0.77051200  | H          | -7.40956700 | -2.21378300 | -2.42597500 |
| C | 0.17232800  | 2.95867800  | -0.63787200 | C          | -5.40747200 | -2.03950100 | -5.73474000 |
| C | -0.03461700 | 2.15440500  | 1.67239100  | C          | -6.79776100 | -1.90166800 | -5.75334900 |
| C | 0.27290500  | 2.48987700  | 3.12236200  | H          | -8.58806100 | -1.86014300 | -4.55482000 |
| C | 1.30280400  | 3.37923400  | 3.46427700  | H          | -7.32147100 | -1.74972600 | -6.69286400 |
| C | 1.59139400  | 3.65268300  | 4.80245500  | H          | -3.14080600 | 0.39997400  | 1.35318100  |
| C | 0.86473700  | 3.03011300  | 5.82143600  | C          | -5.96719900 | 1.93290600  | 0.92094300  |
| C | -0.15793900 | 2.13961900  | 5.49196600  | C          | -7.34691600 | 1.81398100  | 0.69568800  |
| C | -0.45476300 | 1.87894800  | 4.15207000  | C          | -5.53346800 | 2.56936100  | 2.09217400  |
| C | -0.91278600 | 4.37989800  | 1.12588000  | C          | -8.26741900 | 2.28640900  | 1.63284600  |
| C | -0.45425400 | 5.77177200  | 0.71386100  | H          | -7.70473300 | 1.35780400  | -0.22450500 |
| C | 0.89615800  | 6.08118900  | 0.51024700  | C          | -6.44973300 | 3.04765600  | 3.02964000  |
| C | 1.28810300  | 7.38518600  | 0.19731600  | H          | -4.46760200 | 2.69252200  | 2.27210000  |
| C | 0.33705000  | 8.40066900  | 0.08968400  | C          | -7.82003900 | 2.90081300  | 2.80491300  |
| C | -1.01275600 | 8.10318000  | 0.29281100  | H          | -9.33239700 | 2.18548500  | 1.44278600  |
| C | -1.40303400 | 6.79876200  | 0.59703800  | H          | -6.09476900 | 3.53751800  | 3.93207500  |
| H | 1.06885800  | 2.34376700  | -0.72763700 | H          | -8.53553900 | 3.27364900  | 3.53230300  |
| H | 0.34780800  | 3.87367700  | -1.20694800 | C          | -4.35454000 | -1.08793300 | 2.31875000  |
| H | -1.00853300 | 1.63022900  | 1.63231300  | C          | -3.52604100 | -1.97034600 | 3.03409600  |
| H | 0.70587500  | 1.42947600  | 1.30281700  | C          | -5.62270400 | -0.80808000 | 2.84436900  |
| H | 1.85833300  | 3.87598000  | 2.67421800  | C          | -3.94193400 | -2.54600200 | 4.23401200  |
| H | 2.37857400  | 4.36018700  | 5.05040200  | H          | -2.53796600 | -2.21153400 | 2.64601800  |
| H | 1.08855300  | 3.24535600  | 6.86247200  | C          | -6.04903100 | -1.40021300 | 4.03784300  |
| H | -0.73527600 | 1.65704300  | 6.27577000  | H          | -6.28758600 | -0.11920200 | 2.34030800  |
| H | -1.26493200 | 1.19586900  | 3.90484200  | C          | -5.21298900 | -2.26670400 | 4.74027900  |
| H | -1.93506500 | 4.20164700  | 0.74905200  | H          | -3.27457700 | -3.21860200 | 4.76609500  |
| H | -0.99516800 | 4.36581500  | 2.21804500  | H          | -7.04049400 | -1.17120500 | 4.41904400  |
| H | 1.63839700  | 5.29354100  | 0.59581800  | H          | -5.54711600 | -2.72044000 | 5.66901100  |
| H | 2.34047500  | 7.60717900  | 0.04062300  | H          | -3.65778000 | -2.34610400 | -4.52156100 |
| H | 0.64314400  | 9.41478100  | -0.15130000 | H          | -4.84293700 | -1.99725800 | -6.66263500 |
| H | -1.76203500 | 8.88613500  | 0.21253700  |            |             |             |             |
| H | -2.45673300 | 6.57428500  | 0.75191300  |            |             |             |             |
| C | -5.67032700 | -0.92232800 | -0.50420100 | <b>TS5</b> |             |             |             |
| H | -6.45185300 | -0.93711500 | 0.26181900  | Pd         | -0.99373800 | 0.91192600  | -0.73231200 |
| N | -4.56145300 | -0.01316200 | -0.09200700 | P          | -0.93447900 | -1.54130400 | -0.90085600 |
| C | -3.74443400 | -0.46941300 | 1.06117400  | P          | -2.84470500 | 1.62015800  | 0.61665200  |
| H | -3.04106500 | -1.20856100 | 0.66502100  | O          | -3.65595300 | -1.18340000 | -0.08846800 |
| C | -4.96042500 | 1.42627100  | -0.09479400 | C          | -2.39496400 | -2.33263800 | -1.70900100 |
| H | -5.34003000 | 1.62900600  | -1.10281800 | C          | -2.34593600 | -3.20847700 | -2.80143500 |
| H | -4.03435300 | 2.00056300  | 0.00907500  | C          | -3.52296200 | -3.76917600 | -3.30044600 |
| H | -6.10384700 | -0.45457800 | -1.40135200 | C          | -4.75445000 | -3.48877700 | -2.70448000 |
| N | -5.24194700 | -2.28111000 | -0.73398500 | C          | -4.84280800 | -2.63292000 | -1.60015900 |
| C | -6.12304800 | -3.32489300 | -0.16989100 | C          | -3.64936700 | -2.06278900 | -1.15218900 |
| H | -6.37491900 | -3.00227400 | 0.84621900  | C          | -6.12028200 | -2.34532300 | -0.79896600 |
| H | -7.07422300 | -3.42079400 | -0.71802600 | C          | -6.03099900 | -0.89916700 | -0.28967200 |
| C | -4.63370300 | -2.56457200 | -2.03316000 | C          | -4.76801600 | -0.38344700 | 0.02985400  |
| H | -4.33954600 | -3.61975200 | -2.01894500 | C          | -4.55593600 | 0.93163000  | 0.46521800  |
| H | -3.69589300 | -2.00307100 | -2.10478400 | C          | -5.69442100 | 1.72433500  | 0.69508400  |
| C | -5.47351300 | -4.69423400 | -0.10639000 | C          | -6.96802700 | 1.22431100  | 0.43675800  |
| C | -4.41180100 | -4.94243700 | 0.77574800  | C          | -7.13111600 | -0.06377800 | -0.07729200 |
| C | -5.93929500 | -5.74167400 | -0.91006800 | C          | -6.14923600 | -3.30118000 | 0.42912900  |
| C | -3.83462100 | -6.20935700 | 0.85095100  | C          | -7.38810100 | -2.57815900 | -1.63927000 |
| H | -4.05190300 | -4.13972000 | 1.41305600  | C          | -0.80196900 | -2.51233500 | 0.66155600  |
| C | -5.36108300 | -7.01191200 | -0.83840200 | C          | -1.06498100 | -3.89250600 | 0.70356400  |
| H | -6.76351700 | -5.56249200 | -1.59695500 | C          | -0.96245600 | -4.59406300 | 1.90471400  |
| C | -4.30638500 | -7.24853900 | 0.04313200  | C          | -0.60833800 | -3.92642900 | 3.08046700  |
| H | -3.02350000 | -6.39332700 | 1.55160100  | C          | -0.36169500 | -2.55373300 | 3.05168800  |
| H | -5.73711900 | -7.81332900 | -1.46839800 | C          | -0.45992100 | -1.85047000 | 1.84868500  |
| H | -3.85822300 | -8.23643200 | 0.10601900  | C          | 0.44746300  | -2.14162800 | -1.97395400 |
| C | -5.44027500 | -2.30352500 | -3.30880700 | C          | 0.65767000  | -1.47739300 | -3.19560800 |
| C | -6.83401500 | -2.16485300 | -3.34426100 | C          | 1.65601800  | -1.89703400 | -4.07387500 |
|   |             |             |             | C          | 2.47101700  | -2.98176600 | -3.73955300 |



|   |             |             |             |
|---|-------------|-------------|-------------|
| C | 2.27820200  | -3.64260500 | -2.52557000 |
| C | 1.27207200  | -3.22871700 | -1.64684400 |
| C | -3.20420300 | 3.43155900  | 0.50582600  |
| C | -3.71514800 | 3.93755900  | -0.70352600 |
| C | -3.99583100 | 5.29506000  | -0.84277300 |
| C | -3.76118400 | 6.17227400  | 0.22089100  |
| C | -3.25215800 | 5.68046200  | 1.42173900  |
| C | -2.97673900 | 4.31661000  | 1.56761500  |
| C | -2.34009500 | 1.36399800  | 2.36961800  |
| C | -3.22571300 | 0.86298500  | 3.33378500  |
| C | -2.80805200 | 0.70003500  | 4.65682500  |
| C | -1.50867100 | 1.04543600  | 5.03077000  |
| C | -0.62097600 | 1.54762000  | 4.07439400  |
| C | -1.02559800 | 1.69839600  | 2.74707300  |
| H | -1.39519900 | -3.44692600 | -3.26545100 |
| H | -3.47931100 | -4.43920700 | -4.15378900 |
| H | -5.64966700 | -3.95293100 | -3.10381200 |
| H | -5.58286900 | 2.74104600  | 1.05296300  |
| H | -7.83802100 | 1.84851600  | 0.61630900  |
| H | -8.13103900 | -0.41710800 | -0.30417300 |
| H | -6.18425900 | -4.34452600 | 0.09656500  |
| H | -7.03514300 | -3.10272600 | 1.04260900  |
| H | -5.26214600 | -3.17246200 | 1.05717200  |
| H | -7.42193700 | -1.92376200 | -2.51661800 |
| H | -8.28847000 | -2.40472000 | -1.04288100 |
| H | -7.44013400 | -3.61643100 | -1.97965200 |
| H | -1.35989500 | -4.41840200 | -0.19993400 |
| H | -1.16655300 | -5.66096400 | 1.92411400  |
| H | -0.53677500 | -4.47440600 | 4.01577100  |
| H | -0.11129400 | -2.02174400 | 3.96504600  |
| H | -0.29970300 | -0.77695300 | 1.84002500  |
| H | 0.03449900  | -0.62778500 | -3.46294800 |
| H | 1.80122300  | -1.37355300 | -5.01442400 |
| H | 3.25042100  | -3.30883300 | -4.42185300 |
| H | 2.90473300  | -4.48978300 | -2.25985700 |
| H | 1.13503800  | -3.75731300 | -0.70963100 |
| H | -3.90615400 | 3.26501000  | -1.53681300 |
| H | -4.39584800 | 5.66896200  | -1.78106100 |
| H | -3.97644200 | 7.23123100  | 0.11144000  |
| H | -3.07199800 | 6.35396100  | 2.25487600  |
| H | -2.59176700 | 3.95059000  | 2.51324100  |
| H | -4.24203000 | 0.60182500  | 3.05674400  |
| H | -3.50290100 | 0.30893400  | 5.39459800  |
| H | -1.18959200 | 0.92788800  | 6.06268000  |
| H | 0.39006900  | 1.82471900  | 4.36103800  |
| H | -0.31525300 | 2.07457600  | 2.01254500  |
| C | 5.34418600  | 4.85029300  | -2.04343200 |
| C | 4.34098400  | 4.79114100  | -1.08025700 |
| C | 3.53670600  | 3.65028100  | -0.93343600 |
| C | 3.75122800  | 2.55039800  | -1.79375300 |
| C | 4.76713200  | 2.61974100  | -2.76608800 |
| C | 5.56391700  | 3.75422800  | -2.88721200 |
| H | 5.95300800  | 5.74478900  | -2.14038200 |
| H | 4.17870500  | 5.64337700  | -0.42156900 |
| H | 4.90575800  | 1.77430600  | -3.43611600 |
| H | 6.34151700  | 3.79536300  | -3.64505500 |
| C | 2.87883100  | 1.32819000  | -1.65783300 |
| C | 1.62070700  | 1.75716400  | -1.35878300 |
| C | 0.46156100  | 2.24803600  | -1.89270400 |
| H | 0.30763600  | 2.05016300  | -2.95364600 |
| C | -0.56415900 | 2.92462100  | -1.15223300 |
| H | -1.34936700 | 3.41193000  | -1.72208000 |
| H | -0.28651200 | 3.41943800  | -0.22829400 |

|   |            |             |             |
|---|------------|-------------|-------------|
| C | 2.47492700 | 3.66206300  | 0.18119000  |
| H | 2.97028600 | 3.97918400  | 1.11434400  |
| H | 1.75508200 | 4.46562300  | -0.05980400 |
| O | 1.78940800 | 2.45337900  | 0.42807700  |
| H | 2.87073700 | 1.23997000  | 0.69290300  |
| N | 3.55884700 | 0.41795900  | 0.59628400  |
| C | 3.43306700 | 0.13475200  | -0.95274900 |
| C | 2.97567000 | -0.65453200 | 1.48561600  |
| C | 3.77804600 | -1.90935900 | 1.74777800  |
| C | 4.20815800 | -2.76652700 | 0.72421600  |
| C | 4.89750600 | -3.93991600 | 1.02726200  |
| C | 5.15249400 | -4.28755000 | 2.35629900  |
| C | 4.71202900 | -3.45293600 | 3.38339100  |
| C | 4.03185500 | -2.27246600 | 3.07753000  |
| C | 4.89446100 | 0.99780200  | 1.06447600  |
| C | 6.17395900 | 0.26300500  | 0.72737300  |
| C | 6.82526200 | 0.50104200  | -0.49356400 |
| C | 8.04069500 | -0.11959400 | -0.78589600 |
| C | 8.63598000 | -0.96937800 | 0.14763100  |
| C | 8.01436600 | -1.18638900 | 1.37895300  |
| C | 6.79621700 | -0.57164900 | 1.66629400  |
| H | 2.76700100 | -0.72475400 | -1.02991500 |
| H | 4.42545000 | -0.15033700 | -1.30027200 |
| H | 2.76044400 | -0.15975400 | 2.43795100  |
| H | 2.01068500 | -0.90106700 | 1.03370600  |
| H | 4.01276900 | -2.52267200 | -0.31459500 |
| H | 5.23594900 | -4.58671600 | 0.22260100  |
| H | 5.68689300 | -5.20441900 | 2.58786800  |
| H | 4.89847600 | -3.71576600 | 4.42081700  |
| H | 3.69280500 | -1.62614500 | 3.88434000  |
| H | 4.92240400 | 1.99731000  | 0.62723900  |
| H | 4.79168500 | 1.10842800  | 2.14818300  |
| H | 6.39579100 | 1.19795900  | -1.20781900 |
| H | 8.53052600 | 0.07751200  | -1.73534400 |
| H | 9.58664000 | -1.44552500 | -0.07541300 |
| H | 8.48042300 | -1.82881500 | 2.12050800  |
| H | 6.32649800 | -0.74437500 | 2.62929800  |

### I'

|   |             |             |             |
|---|-------------|-------------|-------------|
| C | -1.99623500 | -0.72720200 | 0.00031600  |
| C | -0.77522000 | -1.70363700 | 0.00019100  |
| C | 0.55107200  | -1.08187600 | -0.00003900 |
| C | 1.65349700  | -0.57314900 | -0.00015400 |
| C | 2.97018300  | -0.03130500 | -0.00040800 |
| H | 3.78484100  | -0.75624700 | -0.00137500 |
| C | 3.26500300  | 1.27821400  | 0.00044100  |
| H | 4.29652800  | 1.61674100  | 0.00017700  |
| H | 2.49057800  | 2.03949700  | 0.00141500  |
| C | -1.64529700 | 0.75666000  | -0.00021700 |
| H | -1.03945900 | 1.00200200  | 0.88551000  |
| H | -1.03971600 | 1.00141600  | -0.88629000 |
| O | -2.87827500 | 1.46930400  | -0.00029200 |
| H | -2.67416100 | 2.41635000  | 0.00051800  |
| H | -0.84218000 | -2.36713700 | 0.87262200  |
| H | -0.84243000 | -2.36727700 | -0.87211200 |
| H | -2.62316400 | -0.92323600 | -0.87601800 |
| H | -2.62264900 | -0.92277100 | 0.87711800  |

### INT2'

|   |            |             |             |
|---|------------|-------------|-------------|
| N | 2.45296400 | 0.27047500  | 1.06461900  |
| C | 2.10174000 | -0.10237900 | -0.17200500 |
| C | 2.36330300 | -0.67141000 | 2.19907900  |
| C | 3.72008500 | -1.01800200 | 2.78164400  |

|    |             |             |             |             |             |             |             |
|----|-------------|-------------|-------------|-------------|-------------|-------------|-------------|
| C  | 4.61690500  | -1.81755500 | 2.05709700  | C           | -1.39035000 | 6.02950200  | 1.28592800  |
| C  | 5.86626400  | -2.13608300 | 2.58739000  | C           | -1.75339600 | 4.68270700  | 1.32456000  |
| C  | 6.23342600  | -1.66256600 | 3.85075400  | C           | -2.29273900 | 1.75822900  | 2.17216000  |
| C  | 5.34489800  | -0.87426900 | 4.58200200  | C           | -3.63555100 | 1.45214700  | 2.42688900  |
| C  | 4.09399500  | -0.55418700 | 4.04820900  | C           | -4.09889700 | 1.33714500  | 3.74062400  |
| C  | 2.87647500  | 1.65238900  | 1.38600300  | C           | -3.23140700 | 1.53650500  | 4.81428400  |
| C  | 3.78464700  | 2.29683100  | 0.35716100  | C           | -1.88875400 | 1.84200300  | 4.57109100  |
| C  | 3.54705800  | 3.61740400  | -0.04104800 | C           | -1.42245700 | 1.94251800  | 3.26138500  |
| C  | 4.40379600  | 4.25127200  | -0.94475100 | H           | -1.39340400 | -4.39687200 | -1.68622800 |
| C  | 5.49533900  | 3.56194100  | -1.47233500 | H           | -3.17588200 | -4.77651600 | -3.36018700 |
| C  | 5.74243400  | 2.24268900  | -1.08008200 | H           | -4.94760800 | -3.10564200 | -3.70112500 |
| C  | 4.89858800  | 1.61938400  | -0.16060200 | H           | -3.20519900 | 4.11784200  | -0.88383600 |
| H  | 2.09493000  | -1.16955500 | -0.36776400 | H           | -5.06378500 | 4.03968900  | -2.50351000 |
| H  | 2.46217200  | 0.53617700  | -0.96918900 | H           | -6.02445600 | 1.88516400  | -3.20322000 |
| H  | 1.72568900  | -0.22299100 | 2.97004100  | H           | -6.80349500 | -2.01260700 | -1.33588200 |
| H  | 1.85685400  | -1.56770800 | 1.83333300  | H           | -7.16969100 | -0.28176700 | -1.15539500 |
| H  | 4.33122800  | -2.20290900 | 1.08067200  | H           | -5.89486400 | -1.02964400 | -0.17293300 |
| H  | 6.55150500  | -2.75940000 | 2.01999400  | H           | -5.37106400 | -0.47344000 | -4.46369800 |
| H  | 7.20620400  | -1.91313900 | 4.26369500  | H           | -6.87381500 | 0.01406200  | -3.65268000 |
| H  | 5.62158600  | -0.50916100 | 5.56679600  | H           | -6.50084500 | -1.68627900 | -3.82651800 |
| H  | 3.40067500  | 0.05326900  | 4.62627600  | H           | -2.98838000 | -3.92188400 | 1.00997800  |
| H  | 1.98364700  | 2.27100200  | 1.53984900  | H           | -4.02493800 | -4.40089100 | 3.19792000  |
| H  | 3.39613800  | 1.58484900  | 2.34734600  | H           | -3.33512600 | -3.12168900 | 5.21600200  |
| H  | 2.69371500  | 4.15566600  | 0.36220000  | H           | -1.62056900 | -1.33108500 | 5.01622700  |
| H  | 4.21303500  | 5.28000900  | -1.23823800 | H           | -0.60279700 | -0.82980900 | 2.82117700  |
| H  | 6.15599700  | 4.05010300  | -2.18345800 | H           | 1.01374400  | -2.89143100 | -1.93204700 |
| H  | 6.57478700  | 1.69551900  | -1.51047700 | H           | 2.68579300  | -4.69038600 | -2.09885700 |
| H  | 5.10634300  | 0.60021300  | 0.15615000  | H           | 3.05789100  | -6.24189800 | -0.18819700 |
| Pd | -0.10338000 | 0.19034300  | -0.63999100 | H           | 1.70211000  | -5.98899100 | 1.88192600  |
| P  | -0.84537100 | -2.03043800 | 0.16256100  | H           | -0.01096400 | -4.22869100 | 2.04027500  |
| P  | -1.59793300 | 1.95705500  | 0.47049000  | H           | 0.42394700  | 3.47755300  | -0.99220400 |
| O  | -3.13031400 | -0.39102100 | -0.52139100 | H           | 1.04717500  | 5.86792200  | -1.08100600 |
| C  | -2.14458400 | -2.46921900 | -1.07570000 | H           | -0.10565200 | 7.51243700  | 0.38817600  |
| C  | -2.16602800 | -3.64939100 | -1.83011400 | H           | -1.89832500 | 6.74120200  | 1.93070400  |
| C  | -3.17072700 | -3.86194000 | -2.77487500 | H           | -2.54252100 | 4.36353700  | 1.99760500  |
| C  | -4.17485300 | -2.91214200 | -2.96550200 | H           | -4.32965100 | 1.31739800  | 1.60391600  |
| C  | -4.20609000 | -1.72989800 | -2.21499500 | H           | -5.14435000 | 1.10320800  | 3.92112400  |
| C  | -3.17408600 | -1.53846800 | -1.29191100 | H           | -3.59775000 | 1.46077800  | 5.83415600  |
| C  | -5.33128600 | -0.68920700 | -2.27798900 | H           | -1.20795900 | 2.00937000  | 5.40162400  |
| C  | -4.72269000 | 0.68664200  | -1.97190200 | H           | -0.37918900 | 2.19667900  | 3.08540700  |
| C  | -3.66095700 | 0.76493100  | -1.06208700 | C           | 5.26025900  | -1.11752500 | -3.54410200 |
| C  | -3.08408400 | 1.97707100  | -0.64302200 | C           | 3.95655400  | -1.85608100 | -3.91235600 |
| C  | -3.61785200 | 3.15962800  | -1.17724800 | C           | 2.72197600  | -1.18094000 | -3.50053300 |
| C  | -4.66581500 | 3.11561700  | -2.09520900 | C           | 1.67651500  | -0.64293300 | -3.18850900 |
| C  | -5.20806700 | 1.89278300  | -2.48976600 | C           | 0.42778800  | -0.03863500 | -2.85952200 |
| C  | -6.36387700 | -1.02415400 | -1.16214800 | H           | -0.45477700 | -0.57177200 | -3.21348000 |
| C  | -6.05174200 | -0.70703700 | -3.63824800 | C           | 0.28782400  | 1.31245100  | -2.50264200 |
| C  | -1.70491300 | -2.35127100 | 1.76394100  | H           | -0.64756900 | 1.82516600  | -2.70969100 |
| C  | -2.68460400 | -3.35173300 | 1.88267600  | H           | 1.17118500  | 1.94484500  | -2.45458800 |
| C  | -3.26882400 | -3.62464800 | 3.11943900  | C           | 5.44518800  | 0.20304300  | -4.28112500 |
| C  | -2.88055300 | -2.90608100 | 4.25312900  | H           | 5.40335000  | 0.02872700  | -5.36844100 |
| C  | -1.91347400 | -1.90646600 | 4.14349500  | H           | 4.63217800  | 0.89899100  | -4.02291500 |
| C  | -1.33345600 | -1.62757100 | 2.90428400  | O           | 6.71390800  | 0.72476800  | -3.89721100 |
| C  | 0.36377600  | -3.42794800 | 0.06526000  | H           | 6.88129100  | 1.52569800  | -4.41666000 |
| C  | 1.14910700  | -3.56900300 | -1.09433800 | H           | 3.92560600  | -2.02168200 | -4.99932000 |
| C  | 2.10464900  | -4.58250300 | -1.18698500 | H           | 3.98234100  | -2.85697400 | -3.46021800 |
| C  | 2.31141000  | -5.45601200 | -0.11655200 | H           | 5.29264400  | -0.93183900 | -2.46404000 |
| C  | 1.55070600  | -5.31379400 | 1.04439900  | H           | 6.10837300  | -1.76851500 | -3.78533100 |
| C  | 0.58113300  | -4.31185900 | 1.13557800  |             |             |             |             |
| C  | -1.10855500 | 3.74381800  | 0.49964700  | <b>TS1'</b> |             |             |             |
| C  | -0.09174600 | 4.18954600  | -0.35774900 | Pd          | -0.37040900 | 0.58279000  | -0.84757500 |
| C  | 0.26322300  | 5.54019500  | -0.40361900 | P           | -0.89657100 | -1.82028600 | -0.71115200 |
| C  | -0.38364900 | 6.46281400  | 0.41964200  | P           | -1.54681300 | 1.75121900  | 0.90216900  |

|   |             |             |             |              |             |             |             |
|---|-------------|-------------|-------------|--------------|-------------|-------------|-------------|
| O | -3.33431400 | -0.42173400 | -0.02345000 | H            | -0.93730900 | 6.39758300  | -0.73636500 |
| C | -2.52872700 | -2.02264600 | -1.55947600 | H            | -0.05983600 | 7.29678600  | 1.41477700  |
| C | -2.76918100 | -2.87497100 | -2.64518900 | H            | 0.12788200  | 5.78997200  | 3.38675200  |
| C | -4.03373000 | -2.92405100 | -3.23396000 | H            | -0.53075800 | 3.43056100  | 3.21728300  |
| C | -5.07983100 | -2.14567900 | -2.73546500 | H            | -3.54629500 | 0.87801700  | 2.96771800  |
| C | -4.88874200 | -1.29706400 | -1.63825600 | H            | -3.29255500 | 0.00480800  | 5.26041600  |
| C | -3.60263200 | -1.25069500 | -1.09330200 | H            | -1.03160100 | -0.25701800 | 6.26046400  |
| C | -5.99837600 | -0.49337400 | -0.94496600 | H            | 0.98388400  | 0.33594500  | 4.92399800  |
| C | -5.37248000 | 0.79588000  | -0.39299700 | H            | 0.73777200  | 1.16476900  | 2.61254800  |
| C | -4.04363100 | 0.75706600  | 0.04602100  | C            | 4.78030400  | 2.83322700  | -3.63334700 |
| C | -3.36633700 | 1.86805900  | 0.57328900  | C            | 4.47563200  | 1.32641900  | -3.77832100 |
| C | -4.10485500 | 3.04984800  | 0.74103500  | C            | 3.25373100  | 0.89653100  | -3.04541200 |
| C | -5.43828100 | 3.11424400  | 0.34089200  | C            | 2.02450700  | 0.97384800  | -2.91022200 |
| C | -6.05732400 | 2.00583800  | -0.23929800 | C            | 0.62950000  | 1.10666400  | -2.80070500 |
| C | -6.52851800 | -1.33340400 | 0.25341300  | H            | 0.04135700  | 0.58278800  | -3.55350600 |
| C | -7.16969900 | -0.19616100 | -1.89811300 | C            | 0.03594300  | 2.21394400  | -2.12241400 |
| C | -1.17194600 | -2.71483700 | 0.88435200  | H            | -0.91511900 | 2.58457300  | -2.50121700 |
| C | -2.14859800 | -3.71302000 | 1.03181700  | H            | 0.67726500  | 2.97392300  | -1.68217300 |
| C | -2.28547900 | -4.39784300 | 2.24060000  | C            | 3.76776800  | 3.73683900  | -4.32772000 |
| C | -1.44835800 | -4.09768500 | 3.31745100  | H            | 3.76460800  | 3.52200000  | -5.40960400 |
| C | -0.47867300 | -3.10253700 | 3.18384600  | H            | 2.75492500  | 3.53240600  | -3.94699400 |
| C | -0.34578100 | -2.41372600 | 1.97637600  | O            | 4.15898900  | 5.07690600  | -4.06473500 |
| C | 0.17566700  | -3.01783100 | -1.64566100 | H            | 3.56867400  | 5.66841400  | -4.55513600 |
| C | 0.76136900  | -2.59223500 | -2.85044900 | N            | 3.70516100  | -0.74259000 | -0.23863200 |
| C | 1.57694900  | -3.44725400 | -3.59293000 | C            | 4.32356500  | -0.08765200 | -1.18293700 |
| C | 1.83813500  | -4.74111200 | -3.13389800 | C            | 3.51128700  | -2.21057700 | -0.31487600 |
| C | 1.26881900  | -5.17436500 | -1.93540800 | C            | 4.25278600  | -2.93888300 | 0.78905200  |
| C | 0.43889000  | -4.32368100 | -1.19964900 | C            | 5.65257600  | -2.88792300 | 0.86260700  |
| C | -1.08466000 | 3.53713200  | 1.12876500  | C            | 6.33285500  | -3.57173200 | 1.86918400  |
| C | -1.19453300 | 4.40338600  | 0.02468700  | C            | 5.62068200  | -4.31866400 | 2.81251800  |
| C | -0.83352900 | 5.74585100  | 0.12685300  | C            | 4.22854200  | -4.37699800 | 2.74444700  |
| C | -0.34396500 | 6.25135100  | 1.33446200  | C            | 3.54681000  | -3.68768800 | 1.73821800  |
| C | -0.23625300 | 5.40578800  | 2.43782200  | C            | 3.04731000  | -0.05421400 | 0.90794300  |
| C | -0.60838900 | 4.06150900  | 2.33966000  | C            | 3.69349800  | 1.25036300  | 1.30520900  |
| C | -1.42446700 | 1.07691600  | 2.61760500  | C            | 3.08152700  | 2.47033100  | 0.98809000  |
| C | -2.55187600 | 0.74644000  | 3.38143700  | C            | 3.67246100  | 3.67762600  | 1.37026100  |
| C | -2.40808500 | 0.25756300  | 4.68238500  | C            | 4.88216800  | 3.67232900  | 2.06577000  |
| C | -1.13951500 | 0.10896100  | 5.24326800  | C            | 5.49918400  | 2.45861100  | 2.38560500  |
| C | -0.00814800 | 0.43921700  | 4.49190900  | C            | 4.90710400  | 1.25365400  | 2.01050000  |
| C | -0.14956900 | 0.90516800  | 3.18499300  | H            | 4.84129600  | -0.66046500 | -1.93979700 |
| H | -1.96875000 | -3.49442600 | -3.03509600 | H            | 4.59315100  | 0.94367200  | -1.00326200 |
| H | -4.20831900 | -3.58131800 | -4.08057500 | H            | 2.43882800  | -2.41229100 | -0.26103500 |
| H | -6.05538800 | -2.21392900 | -3.20433600 | H            | 3.84668600  | -2.52816500 | -1.30587900 |
| H | -3.63084800 | 3.92711600  | 1.16582200  | H            | 6.21568200  | -2.31628100 | 0.12792900  |
| H | -5.99620800 | 4.03650900  | 0.47216900  | H            | 7.41729500  | -3.52919500 | 1.91407300  |
| H | -7.08950400 | 2.08865500  | -0.56168000 | H            | 6.15145600  | -4.85477300 | 3.59387900  |
| H | -6.95950400 | -2.27528400 | -0.10407000 | H            | 3.67043600  | -4.95874800 | 3.47242600  |
| H | -7.30508000 | -0.77851100 | 0.79168300  | H            | 2.46174600  | -3.73860000 | 1.68760100  |
| H | -5.72653700 | -1.57106100 | 0.95953800  | H            | 1.99712600  | 0.09520300  | 0.62128100  |
| H | -6.85158500 | 0.39781300  | -2.76134400 | H            | 3.07840600  | -0.77091400 | 1.73352300  |
| H | -7.96600500 | 0.34563500  | -1.37980900 | H            | 2.13595800  | 2.47286800  | 0.45147400  |
| H | -7.61752500 | -1.12501400 | -2.26302600 | H            | 3.18329800  | 4.61640400  | 1.12781600  |
| H | -2.80247800 | -3.95952900 | 0.20082600  | H            | 5.34312500  | 4.60988000  | 2.36295600  |
| H | -3.04666400 | -5.16684400 | 2.33979100  | H            | 6.43690600  | 2.45249500  | 2.93379700  |
| H | -1.55824700 | -4.63023500 | 4.25799300  | H            | 5.38443200  | 0.31019000  | 2.26669900  |
| H | 0.16022000  | -2.84542600 | 4.02368500  | H            | 4.35027600  | 1.07461900  | -4.84051300 |
| H | 0.38739800  | -1.61746900 | 1.89219300  | H            | 5.35907100  | 0.76456000  | -3.44466100 |
| H | 0.57821400  | -1.58463100 | -3.20679900 | H            | 4.82398700  | 3.11024800  | -2.57253600 |
| H | 2.00926900  | -3.10124900 | -4.52802000 | H            | 5.77226700  | 3.03330300  | -4.05543200 |
| H | 2.47667700  | -5.40690900 | -3.70776700 |              |             |             |             |
| H | 1.46229400  | -6.17994800 | -1.57215200 |              |             |             |             |
| H | -0.00444600 | -4.68419100 | -0.27768600 |              |             |             |             |
| H | -1.58765300 | 4.03253400  | -0.91577600 |              |             |             |             |
|   |             |             |             | <b>INT3'</b> |             |             |             |
|   |             |             |             | Pd           | -1.08363400 | 0.72711600  | -1.16621800 |
|   |             |             |             | P            | -0.39720300 | -1.54532800 | -0.58873400 |

|   |             |             |             |             |             |             |             |
|---|-------------|-------------|-------------|-------------|-------------|-------------|-------------|
| P | -2.99118400 | 1.38482900  | 0.23231300  | H           | -4.55619300 | 2.06790900  | -2.12310800 |
| O | -3.06384500 | -1.54652600 | 0.59498400  | H           | -5.63841800 | 4.13135400  | -2.93059500 |
| C | -1.68919700 | -2.85308400 | -0.80944700 | H           | -5.49134100 | 6.22747300  | -1.59601300 |
| C | -1.50566500 | -4.02121200 | -1.56432600 | H           | -4.26767700 | 6.22574000  | 0.56843000  |
| C | -2.51295700 | -4.98444900 | -1.62444800 | H           | -3.19905300 | 4.16178500  | 1.39331600  |
| C | -3.70490600 | -4.81231100 | -0.91828900 | H           | -3.77453200 | 0.79981300  | 3.06191800  |
| C | -3.92100100 | -3.67002500 | -0.13991800 | H           | -2.72841600 | 1.36673100  | 5.22498800  |
| C | -2.90266000 | -2.71223800 | -0.12768300 | H           | -0.62891100 | 2.69607700  | 5.29156700  |
| C | -5.14651100 | -3.42811800 | 0.75296800  | H           | 0.42912200  | 3.44256300  | 3.16438700  |
| C | -5.43414500 | -1.92105000 | 0.72998000  | H           | -0.58441700 | 2.85396300  | 0.99859800  |
| C | -4.34556700 | -1.04562100 | 0.64014500  | C           | 2.78891700  | 4.29494900  | -1.57086200 |
| C | -4.47556700 | 0.34696800  | 0.57841300  | C           | 2.76766100  | 2.92487300  | -2.28725200 |
| C | -5.76708000 | 0.88405400  | 0.71179400  | C           | 1.98731900  | 1.81931300  | -1.57752700 |
| C | -6.86794200 | 0.04116900  | 0.84491700  | C           | 0.82143900  | 1.47743100  | -2.09504500 |
| C | -6.70441000 | -1.34602200 | 0.82966400  | C           | -0.23598600 | 1.71771800  | -2.95778400 |
| C | -4.78053200 | -3.84133000 | 2.20832600  | H           | -0.34579800 | 1.14759300  | -3.88047200 |
| C | -6.36341500 | -4.25050600 | 0.29547700  | C           | -1.31062400 | 2.48628300  | -2.43960400 |
| C | 0.23016000  | -1.91594200 | 1.10286600  | H           | -2.23434500 | 2.56644400  | -3.00386700 |
| C | 0.41162700  | -3.24013000 | 1.53935100  | H           | -1.07814700 | 3.30366100  | -1.76294300 |
| C | 0.89032400  | -3.49945500 | 2.82300500  | C           | 1.46982000  | 5.05977100  | -1.51263400 |
| C | 1.18230200  | -2.44308300 | 3.69056800  | H           | 1.68392700  | 6.10451600  | -1.24862800 |
| C | 0.98880200  | -1.12657400 | 3.27155000  | H           | 0.98164400  | 5.05835400  | -2.49972600 |
| C | 0.51349000  | -0.86404700 | 1.98461100  | O           | 0.60387100  | 4.48057100  | -0.52459500 |
| C | 0.89840600  | -2.13111300 | -1.76640000 | H           | -0.10100500 | 5.12068900  | -0.34022100 |
| C | 0.66006900  | -1.94587300 | -3.14104200 | N           | 3.98237000  | 0.98862300  | -0.17230600 |
| C | 1.57377900  | -2.40365500 | -4.08821000 | C           | 2.55119700  | 1.22733100  | -0.27517000 |
| C | 2.74850700  | -3.04132500 | -3.67602700 | C           | 4.83748000  | 2.09340300  | 0.26893900  |
| C | 2.99936400  | -3.21976700 | -2.31624900 | C           | 6.03027300  | 1.67223300  | 1.11088100  |
| C | 2.07723000  | -2.77127000 | -1.36428300 | C           | 5.84369300  | 1.13589000  | 2.39237000  |
| C | -3.78143500 | 2.96736600  | -0.31196600 | C           | 6.93591300  | 0.78631900  | 3.18326500  |
| C | -4.48019400 | 2.97831400  | -1.53280000 | C           | 8.23661000  | 0.96968900  | 2.70319700  |
| C | -5.09549600 | 4.14232600  | -1.98967000 | C           | 8.43415000  | 1.50486000  | 1.43093100  |
| C | -5.01421300 | 5.31940100  | -1.23902100 | C           | 7.33462100  | 1.85530400  | 0.64260600  |
| C | -4.32433000 | 5.31883000  | -0.02728600 | C           | 4.57128500  | 0.09600100  | -1.16853900 |
| C | -3.71430000 | 4.14912900  | 0.43875500  | C           | 5.30392100  | -1.12238400 | -0.61901100 |
| C | -2.25952300 | 1.78334300  | 1.87553100  | C           | 4.90841500  | -1.74177200 | 0.57185000  |
| C | -2.85166800 | 1.37060000  | 3.07688900  | C           | 5.52725600  | -2.91688900 | 1.00216000  |
| C | -2.26069800 | 1.69403900  | 4.30082200  | C           | 6.55275200  | -3.49105800 | 0.24641600  |
| C | -1.08130900 | 2.43917600  | 4.33788500  | C           | 6.96067800  | -2.87449100 | -0.93841800 |
| C | -0.48666600 | 2.85807400  | 3.14395700  | C           | 6.33990300  | -1.69803700 | -1.36389400 |
| C | -1.06467100 | 2.52611600  | 1.91789000  | H           | 2.27090700  | 1.90429600  | 0.54176600  |
| H | -0.58143100 | -4.17653400 | -2.10866400 | H           | 2.02550500  | 0.28611100  | -0.08995800 |
| H | -2.36380500 | -5.88088700 | -2.21864900 | H           | 5.21405500  | 2.68692500  | -0.58378800 |
| H | -4.46554200 | -5.58343600 | -0.97236600 | H           | 4.21009500  | 2.76468100  | 0.86732000  |
| H | -5.91362200 | 1.95768500  | 0.68927000  | H           | 4.83294400  | 0.98909400  | 2.76654100  |
| H | -7.86218200 | 0.46593300  | 0.94392900  | H           | 6.77662400  | 0.37407300  | 4.17620200  |
| H | -7.58114300 | -1.98002600 | 0.90427800  | H           | 9.08879300  | 0.69841100  | 3.32013400  |
| H | -4.53880600 | -4.90907800 | 2.24903100  | H           | 9.44130900  | 1.65179000  | 1.05058100  |
| H | -5.62557000 | -3.65140500 | 2.87938800  | H           | 7.49409100  | 2.27826000  | -0.34718200 |
| H | -3.91624100 | -3.28140700 | 2.57871800  | H           | 3.76295000  | -0.26475900 | -1.81840100 |
| H | -6.66732800 | -3.99751400 | -0.72572000 | H           | 5.25882600  | 0.65192700  | -1.82799200 |
| H | -7.21569500 | -4.08606400 | 0.96116600  | H           | 4.12407100  | -1.28531200 | 1.16814200  |
| H | -6.14337800 | -5.32124500 | 0.33608800  | H           | 5.21275600  | -3.38170600 | 1.93321800  |
| H | 0.17440800  | -4.06951400 | 0.87972200  | H           | 7.03787600  | -4.40281000 | 0.58400400  |
| H | 1.02983300  | -4.52667600 | 3.14775200  | H           | 7.76835200  | -3.30267700 | -1.52625500 |
| H | 1.54981700  | -2.64834900 | 4.69206700  | H           | 6.66664400  | -1.22128400 | -2.28624100 |
| H | 1.19382800  | -0.30013000 | 3.94581200  | H           | 2.36371900  | 3.06311700  | -3.29636200 |
| H | 0.34564500  | 0.16199900  | 1.67591500  | H           | 3.80369200  | 2.58819900  | -2.40997700 |
| H | -0.25263600 | -1.45571900 | -3.47184600 | H           | 3.17385900  | 4.20023700  | -0.55055000 |
| H | 1.37055600  | -2.26343500 | -5.14636400 | H           | 3.50448900  | 4.92669800  | -2.11349500 |
| H | 3.46349500  | -3.39444100 | -4.41361700 |             |             |             |             |
| H | 3.91524500  | -3.69861400 | -1.98427800 |             |             |             |             |
| H | 2.29452100  | -2.91829600 | -0.31262300 |             |             |             |             |
|   |             |             |             | <b>TS2'</b> |             |             |             |
|   |             |             |             | Pd          | 0.62019100  | 0.53068800  | -0.10349300 |

|   |             |             |             |   |             |             |             |
|---|-------------|-------------|-------------|---|-------------|-------------|-------------|
| P | 2.44625600  | 1.40946100  | 1.26950100  | H | 5.00626900  | 0.57803900  | 2.67982000  |
| P | 0.16878600  | 2.13648800  | -1.99245300 | H | -2.68986500 | 2.50515500  | -1.55371700 |
| O | 1.56675200  | 3.85942200  | -0.04316000 | H | -4.71004500 | 2.11654400  | -2.91394500 |
| C | 2.00690900  | 3.00450200  | 2.11176000  | H | -4.51922600 | 1.11876600  | -5.18943200 |
| C | 2.06251000  | 3.21308100  | 3.49709600  | H | -2.27187700 | 0.54824000  | -6.09270000 |
| C | 1.76790100  | 4.46635700  | 4.03569100  | H | -0.24718000 | 0.99808700  | -4.76684000 |
| C | 1.45055100  | 5.53982300  | 3.20242000  | H | 1.91149500  | 3.99628700  | -3.58588600 |
| C | 1.39982400  | 5.38082100  | 1.81283500  | H | 3.80093000  | 3.59145400  | -5.12088800 |
| C | 1.64727900  | 4.09841500  | 1.31288500  | H | 4.54648200  | 1.26961900  | -5.60534900 |
| C | 1.19803300  | 6.52249100  | 0.80630100  | H | 3.39316400  | -0.65064400 | -4.51524900 |
| C | 0.44097600  | 5.95318900  | -0.40046400 | H | 1.52610300  | -0.26015000 | -2.96368800 |
| C | 0.66316200  | 4.61614900  | -0.75339900 | C | 0.84996000  | -4.62745900 | -1.44245600 |
| C | 0.00599400  | 3.97474700  | -1.81349700 | C | 0.88394500  | -3.94529700 | -0.04612200 |
| C | -0.82461200 | 4.76526400  | -2.62453600 | C | 1.36441400  | -2.50099300 | 0.00692700  |
| C | -1.02996400 | 6.11150300  | -2.33039100 | C | 0.49261200  | -1.52205400 | 0.25637400  |
| C | -0.42517600 | 6.69062800  | -1.21312200 | C | -0.81496900 | -1.07793600 | 0.51870400  |
| C | 2.60101400  | 6.99856600  | 0.32877600  | H | -1.05535200 | -0.86314600 | 1.56144700  |
| C | 0.45689500  | 7.71659400  | 1.43331900  | C | -1.87843500 | -0.86347900 | -0.43371200 |
| C | 4.08673400  | 1.83896100  | 0.53027300  | H | -2.51687400 | 0.00252800  | -0.30114400 |
| C | 4.98021900  | 2.72314000  | 1.15974400  | H | -1.64765200 | -1.08013700 | -1.47346800 |
| C | 6.21150900  | 3.02089800  | 0.57526800  | C | 0.35906000  | -3.79979100 | -2.63647300 |
| C | 6.56513800  | 2.44657200  | -0.64859400 | H | 0.07734600  | -4.48522000 | -3.45167200 |
| C | 5.67994100  | 1.57765700  | -1.28707200 | H | -0.53489900 | -3.22163600 | -2.37971000 |
| C | 4.44737900  | 1.27733000  | -0.70248200 | O | 1.29732100  | -2.83717100 | -3.10470000 |
| C | 2.85683500  | 0.35548900  | 2.73549200  | H | 2.10905400  | -3.30721800 | -3.36346200 |
| C | 1.78756300  | -0.23371400 | 3.43297000  | N | 3.89071600  | -3.06711700 | 0.20458800  |
| C | 2.01598700  | -0.99898600 | 4.57615200  | C | 2.83530000  | -2.19302400 | -0.30448900 |
| C | 3.32124100  | -1.20461300 | 5.03199200  | C | 4.31974400  | -4.21092600 | -0.59441800 |
| C | 4.39120800  | -0.63696100 | 4.34015500  | C | 4.72118100  | -3.85737300 | -2.01664500 |
| C | 4.16183900  | 0.14234400  | 3.20250900  | C | 5.52289200  | -2.73735800 | -2.28134900 |
| C | -1.31315700 | 1.77615900  | -3.05597100 | C | 5.92442500  | -2.43932700 | -3.58378800 |
| C | -2.59131900 | 2.06646600  | -2.54424700 | C | 5.53084700  | -3.25385200 | -4.65025500 |
| C | -3.73556200 | 1.84499000  | -3.31131700 | C | 4.73926300  | -4.37578400 | -4.40027300 |
| C | -3.62865300 | 1.29124000  | -4.59157800 | C | 4.33952000  | -4.67240300 | -3.09233600 |
| C | -2.36898100 | 0.97301700  | -5.09728700 | C | 3.90483500  | -3.30412100 | 1.64525800  |
| C | -1.21894900 | 1.22317700  | -4.34135600 | C | 5.30060100  | -3.52540700 | 2.20741100  |
| C | 1.58025100  | 1.90376100  | -3.16034600 | C | 6.34753200  | -2.64669800 | 1.89216400  |
| C | 2.23408800  | 2.97828100  | -3.77959800 | C | 7.61598900  | -2.82329700 | 2.44440000  |
| C | 3.30182100  | 2.74877300  | -4.65028400 | C | 7.85903700  | -3.88254500 | 3.32429100  |
| C | 3.72088500  | 1.44519100  | -4.92085700 | C | 6.82561200  | -4.76398400 | 3.64284100  |
| C | 3.07230700  | 0.36714300  | -4.31229600 | C | 5.55725800  | -4.58565200 | 3.08375900  |
| C | 2.01430700  | 0.59281800  | -3.42961900 | H | 2.94358900  | -2.15182300 | -1.39145200 |
| H | 2.33621600  | 2.39739800  | 4.15641500  | H | 3.03267200  | -1.18292800 | 0.06621500  |
| H | 1.80542500  | 4.61175500  | 5.11125300  | H | 5.19770400  | -4.62665100 | -0.08323600 |
| H | 1.25378000  | 6.51027400  | 3.64490800  | H | 3.58096900  | -5.03287900 | -0.62001500 |
| H | -1.32998400 | 4.32164100  | -3.47473300 | H | 5.82562900  | -2.10078200 | -1.45543100 |
| H | -1.67629500 | 6.71015200  | -2.96546200 | H | 6.55456600  | -1.57283500 | -3.76762100 |
| H | -0.62497100 | 7.73231000  | -0.98649300 | H | 5.84840200  | -3.02308100 | -5.66330100 |
| H | 3.17860000  | 7.38620200  | 1.17544700  | H | 4.43996000  | -5.02638300 | -5.21774400 |
| H | 2.49781400  | 7.79598400  | -0.41579500 | H | 3.74860300  | -5.56655900 | -2.90358100 |
| H | 3.16744600  | 6.17880500  | -0.12409600 | H | 3.46316300  | -2.42135800 | 2.11999700  |
| H | -0.54154000 | 7.43677100  | 1.78569500  | H | 3.27109500  | -4.16170100 | 1.94034200  |
| H | 0.35327900  | 8.53287600  | 0.71260600  | H | 6.15853200  | -1.82573000 | 1.20593100  |
| H | 1.02124500  | 8.12205500  | 2.27812300  | H | 8.41765800  | -2.13517600 | 2.18841400  |
| H | 4.71271900  | 3.18441100  | 2.10589900  | H | 8.84785700  | -4.02116300 | 3.75285000  |
| H | 6.89260500  | 3.70518700  | 1.07388900  | H | 7.00630200  | -5.59508200 | 4.31940200  |
| H | 7.52214400  | 2.68457400  | -1.10481400 | H | 4.75657100  | -5.27974000 | 3.33142800  |
| H | 5.93423200  | 1.14373700  | -2.24986400 | C | -4.14225700 | -1.68223300 | 1.02214900  |
| H | 3.75669200  | 0.62179700  | -1.22151500 | H | -5.02096700 | -2.33047000 | 1.05981600  |
| H | 0.77082900  | -0.08410300 | 3.07957700  | N | -3.37795100 | -2.05303500 | -0.23978800 |
| H | 1.17656500  | -1.43784700 | 5.10901300  | C | -4.12149500 | -1.85834300 | -1.54019000 |
| H | 3.50240700  | -1.80796000 | 5.91696300  | H | -3.87255500 | -0.85067900 | -1.88162000 |
| H | 5.40981800  | -0.80475900 | 4.67690300  | C | -2.73449400 | -3.40062000 | -0.08510800 |

|              |             |             |             |   |             |             |             |
|--------------|-------------|-------------|-------------|---|-------------|-------------|-------------|
| H            | -2.09283600 | -3.30715000 | 0.79502500  | P | -0.29778800 | 2.05498200  | -2.12531100 |
| H            | -2.07325500 | -3.50635300 | -0.94682700 | O | 0.66891100  | 3.92470400  | -0.07139800 |
| H            | -3.48229300 | -1.98020900 | 1.84087000  | C | 1.34599800  | 3.09422100  | 2.03446600  |
| N            | -4.52217800 | -0.29399200 | 1.13659300  | C | 1.39687500  | 3.25664600  | 3.42670300  |
| C            | -5.98147700 | -0.08164700 | 1.22517300  | C | 0.84328400  | 4.38653500  | 4.03092500  |
| H            | -6.44789800 | -0.73828300 | 0.48657200  | C | 0.26285100  | 5.39116700  | 3.25533700  |
| H            | -6.37080000 | -0.38798900 | 2.20892700  | C | 0.20784900  | 5.28194000  | 1.86114800  |
| C            | -3.76026900 | 0.47724100  | 2.15969200  | C | 0.72621900  | 4.11194500  | 1.29403200  |
| H            | -4.05458100 | 1.52312700  | 2.03957300  | C | -0.27284500 | 6.39413000  | 0.91837500  |
| H            | -2.69959600 | 0.42212200  | 1.90164200  | C | -0.90179700 | 5.72948700  | -0.31244900 |
| C            | -6.41758500 | 1.34469100  | 0.94330300  | C | -0.38811300 | 4.49879400  | -0.74003400 |
| C            | -5.76088000 | 2.14523200  | -0.00056900 | C | -0.89164200 | 3.78956600  | -1.84260000 |
| C            | -7.54154300 | 1.86622500  | 1.59673300  | C | -1.88753400 | 4.41795300  | -2.60733000 |
| C            | -6.21612600 | 3.43396100  | -0.28410100 | C | -2.39314200 | 5.66124600  | -2.23229500 |
| H            | -4.88211300 | 1.75111600  | -0.50162300 | C | -1.92220200 | 6.29672500  | -1.08214000 |
| C            | -8.00661500 | 3.15101300  | 1.30762900  | C | 0.97293600  | 7.20509000  | 0.45595200  |
| H            | -8.06197200 | 1.25897000  | 2.33444900  | C | -1.25646600 | 7.35173200  | 1.61461800  |
| C            | -7.34376900 | 3.94039700  | 0.36662400  | C | 3.63263500  | 2.45119300  | 0.44391300  |
| H            | -5.68881400 | 4.04587500  | -1.01182200 | C | 4.28227900  | 3.51612600  | 1.09091800  |
| H            | -8.88163500 | 3.53654000  | 1.82359500  | C | 5.44481500  | 4.06994300  | 0.55331100  |
| H            | -7.69855900 | 4.94325300  | 0.14645600  | C | 5.97576600  | 3.56970100  | -0.63818200 |
| C            | -3.95572300 | 0.05396100  | 3.60761800  | C | 5.33622600  | 2.51586200  | -1.29160800 |
| C            | -3.08345300 | -0.85960500 | 4.21981300  | C | 4.17103900  | 1.96356700  | -0.75515400 |
| C            | -5.01384500 | 0.57296100  | 4.37048700  | C | 2.72192900  | 0.64043500  | 2.53547700  |
| C            | -3.27603100 | -1.26617500 | 5.54189100  | C | 1.79626000  | -0.18134500 | 3.20330400  |
| H            | -2.22752200 | -1.24220000 | 3.66635100  | C | 2.18670700  | -0.95873900 | 4.29301200  |
| C            | -5.20961100 | 0.17013100  | 5.69233200  | C | 3.51793800  | -0.94822400 | 4.71946300  |
| C            | -4.34498100 | -0.75588300 | 6.28005600  | C | 4.44870400  | -0.15009400 | 4.05495800  |
| H            | -2.58586900 | -1.97101400 | 5.99794100  | C | 4.05351000  | 0.64563300  | 2.97560600  |
| H            | -4.49499200 | -1.06615600 | 7.31025100  | C | -1.61249100 | 1.41009600  | -3.27462400 |
| H            | -3.65365800 | -2.55185300 | -2.24732900 | C | -2.95087100 | 1.39883800  | -2.83936500 |
| C            | -3.59241300 | -4.64186900 | 0.03374300  | C | -3.96539400 | 0.88463800  | -3.64824700 |
| C            | -4.16040300 | -5.02972600 | 1.25743300  | C | -3.66160100 | 0.33828200  | -4.89927800 |
| C            | -3.76692300 | -5.47575800 | -1.08092500 | C | -2.33702200 | 0.32784400  | -5.33500800 |
| C            | -4.91678800 | -6.19831000 | 1.35214800  | C | -1.32353200 | 0.86614400  | -4.53555200 |
| H            | -4.00379300 | -4.42293100 | 2.14565100  | C | 1.14241100  | 2.26094300  | -3.26820800 |
| C            | -4.51784600 | -6.64853600 | -0.98770200 | C | 1.44953800  | 3.47456200  | -3.89940300 |
| H            | -3.31072300 | -5.20635100 | -2.03092100 | C | 2.53957600  | 3.56567700  | -4.76793800 |
| C            | -5.10139500 | -7.00808700 | 0.22848800  | C | 3.32835400  | 2.44428100  | -5.02972100 |
| H            | -5.35148800 | -6.48291400 | 2.30605500  | C | 3.03047800  | 1.22880500  | -4.40856000 |
| H            | -4.64266600 | -7.28115900 | -1.86174600 | C | 1.95287400  | 1.14177500  | -3.52579400 |
| H            | -5.68520100 | -7.92078000 | 0.30474300  | H | 1.87497900  | 2.49941700  | 4.03820200  |
| C            | -5.63776000 | -1.98987400 | -1.60958700 | H | 0.88584000  | 4.49665100  | 5.11069800  |
| C            | -6.34057800 | -0.93685700 | -2.21691500 | H | -0.13456300 | 6.27279500  | 3.74630500  |
| C            | -6.36507700 | -3.11435200 | -1.18915100 | H | -2.28297200 | 3.92410300  | -3.48771200 |
| C            | -7.72335200 | -0.99501800 | -2.39348300 | H | -3.16482100 | 6.13413200  | -2.83273200 |
| H            | -5.79660300 | -0.06060300 | -2.55657200 | H | -2.34813300 | 7.25209500  | -0.79585900 |
| C            | -7.75062900 | -3.16798800 | -1.35294800 | H | 1.46123900  | 7.67495000  | 1.31711900  |
| H            | -5.86080700 | -3.95520400 | -0.73207400 | H | 0.67414500  | 7.99136600  | -0.24646700 |
| C            | -8.43587500 | -2.11152100 | -1.95534900 | H | 1.70475600  | 6.56157300  | -0.04238600 |
| H            | -8.24133600 | -0.16468600 | -2.86479800 | H | -2.15648400 | 6.83102900  | 1.95860800  |
| H            | -8.29307400 | -4.04587800 | -1.01325100 | H | -1.55988500 | 8.15808700  | 0.94063600  |
| H            | -9.51337900 | -2.15965500 | -2.08381100 | H | -0.78467600 | 7.83364700  | 2.47583000  |
| H            | -5.67736700 | 1.31294200  | 3.92993900  | H | 3.88081600  | 3.91493900  | 2.01766700  |
| H            | -6.03196400 | 0.58730700  | 6.26704800  | H | 5.93543100  | 4.89318600  | 1.06565400  |
| H            | -0.11758100 | -3.99082800 | 0.38691700  | H | 6.87926000  | 4.00441100  | -1.05687000 |
| H            | 1.51842800  | -4.56126300 | 0.60339600  | H | 5.73230300  | 2.13050700  | -2.22688800 |
| H            | 1.84350400  | -5.00892900 | -1.69915900 | H | 3.66674000  | 1.16317400  | -1.28504600 |
| H            | 0.21053200  | -5.51702200 | -1.35433900 | H | 0.76189200  | -0.20545200 | 2.87243100  |
|              |             |             |             | H | 1.45279400  | -1.57612900 | 4.80453000  |
|              |             |             |             | H | 3.82804700  | -1.56400400 | 5.55910800  |
|              |             |             |             | H | 5.48947700  | -0.15073100 | 4.36501300  |
|              |             |             |             | H | 4.79195600  | 1.26098300  | 2.47383500  |
| <b>INT4'</b> |             |             |             |   |             |             |             |
| Pd           | 0.41490200  | 0.50652300  | -0.29443500 |   |             |             |             |
| P            | 2.09825600  | 1.66085800  | 1.11916800  |   |             |             |             |

|   |             |             |             |             |             |             |             |
|---|-------------|-------------|-------------|-------------|-------------|-------------|-------------|
| H | -3.20684900 | 1.82867500  | -1.87398300 | H           | -1.74624300 | -3.92491800 | -0.64085900 |
| H | -4.99758700 | 0.92849600  | -3.30968800 | H           | -3.01325900 | -2.02854900 | 1.95637000  |
| H | -4.45097600 | -0.06027300 | -5.53035900 | N           | -4.32639100 | -0.60412400 | 1.17444800  |
| H | -2.08794000 | -0.07913700 | -6.31152000 | C           | -5.78119400 | -0.46157900 | 1.40206400  |
| H | -0.30539300 | 0.87408200  | -4.90958600 | H           | -6.26971800 | -1.31232400 | 0.92020400  |
| H | 0.83805000  | 4.35219400  | -3.71531600 | H           | -6.02644700 | -0.51918100 | 2.47300300  |
| H | 2.76742500  | 4.51494500  | -5.24496500 | C           | -3.50317700 | 0.44305500  | 1.80988200  |
| H | 4.17063300  | 2.51661900  | -5.71215200 | H           | -4.09055500 | 1.36530100  | 1.75489600  |
| H | 3.64191100  | 0.35155800  | -4.60403800 | H           | -2.61469600 | 0.62889500  | 1.19606200  |
| H | 1.73729400  | 0.19900300  | -3.02791400 | C           | -6.37414100 | 0.82345800  | 0.85131100  |
| C | 1.35044500  | -4.63791300 | -1.83638500 | C           | -5.93053200 | 1.38777200  | -0.35131700 |
| C | 1.29664900  | -3.94927500 | -0.43726000 | C           | -7.42811400 | 1.44340800  | 1.53358900  |
| C | 1.46178800  | -2.43373500 | -0.45579100 | C           | -6.52801200 | 2.54048400  | -0.86298500 |
| C | 0.48944500  | -1.59620400 | -0.08612100 | H           | -5.10169800 | 0.92265300  | -0.87461100 |
| C | -0.81604700 | -1.26348200 | 0.25417200  | C           | -8.03722000 | 2.58968200  | 1.01889600  |
| H | -1.01788200 | -1.06395700 | 1.30873400  | H           | -7.77647900 | 1.02661000  | 2.47612400  |
| C | -2.03594500 | -1.42806500 | -0.61432100 | C           | -7.58817300 | 3.14277500  | -0.18132700 |
| H | -2.61606200 | -0.51232000 | -0.72324500 | H           | -6.16322500 | 2.97221100  | -1.79157000 |
| H | -1.75338000 | -1.79204400 | -1.60233200 | H           | -8.85474500 | 3.05552100  | 1.56198800  |
| C | 0.03139900  | -5.22050400 | -2.33893600 | H           | -8.05455200 | 4.03997400  | -0.57826100 |
| H | 0.20676500  | -5.81184100 | -3.24915700 | C           | -3.04834800 | 0.22451000  | 3.25237400  |
| H | -0.40309300 | -5.89336500 | -1.59184500 | C           | -3.69204600 | -0.63177200 | 4.15621800  |
| O | -0.98233000 | -4.23556400 | -2.58878900 | C           | -1.94232300 | 0.95944300  | 3.70662400  |
| H | -0.65755600 | -3.64674200 | -3.28848700 | C           | -3.24541800 | -0.74820800 | 5.47559300  |
| N | 4.05004400  | -2.52268500 | -0.47952100 | H           | -4.55131900 | -1.21647700 | 3.84150200  |
| C | 2.81521700  | -1.89038000 | -0.94580100 | C           | -1.50022300 | 0.85216200  | 5.02538700  |
| C | 4.56149900  | -3.67275400 | -1.22558300 | C           | -2.15021000 | -0.00514900 | 5.91622000  |
| C | 6.03242900  | -3.59770900 | -1.61576500 | H           | -3.76082100 | -1.41726600 | 6.15948100  |
| C | 6.54015800  | -2.46830400 | -2.27102500 | H           | -1.80668600 | -0.09250200 | 6.94301800  |
| C | 7.86623400  | -2.42878600 | -2.69797500 | H           | -3.64971500 | -3.50465300 | -1.84045700 |
| C | 8.70793100  | -3.52337400 | -2.47782100 | C           | -3.14013200 | -4.97916400 | 0.59759400  |
| C | 8.21236700  | -4.65250900 | -1.82632800 | C           | -3.56636800 | -5.22930100 | 1.91175700  |
| C | 6.88223500  | -4.68607800 | -1.39953000 | C           | -3.36790900 | -5.95819500 | -0.38323300 |
| C | 4.20630900  | -2.60442700 | 0.97151700  | C           | -4.24380100 | -6.40739300 | 2.22748500  |
| C | 5.63556400  | -2.47837700 | 1.47425100  | H           | -3.35757500 | -4.50621700 | 2.69642900  |
| C | 6.43841500  | -1.39191500 | 1.10005400  | C           | -4.04153500 | -7.13923200 | -0.06754600 |
| C | 7.72121600  | -1.24215300 | 1.62397600  | H           | -3.00935200 | -5.79476600 | -1.39637700 |
| C | 8.22384800  | -2.17646100 | 2.53532300  | C           | -4.48845000 | -7.36197800 | 1.23641900  |
| C | 7.43418400  | -3.26228700 | 2.91303400  | H           | -4.56842200 | -6.58654600 | 3.24843100  |
| C | 6.14959400  | -3.40943100 | 2.38209100  | H           | -4.21138100 | -7.88619700 | -0.83751200 |
| H | 2.84250700  | -1.92109800 | -2.04396800 | H           | -5.01042200 | -8.28171000 | 1.48409900  |
| H | 2.84486200  | -0.83028800 | -0.67193700 | C           | -5.56749400 | -2.82513200 | -1.08532900 |
| H | 4.39300900  | -4.61538200 | -0.67456000 | C           | -6.40485000 | -1.91229700 | -1.74738900 |
| H | 3.97937500  | -3.75391700 | -2.15058900 | C           | -6.16835100 | -3.87789400 | -0.37512700 |
| H | 5.89007900  | -1.61116800 | -2.42930900 | C           | -7.79388900 | -2.02907600 | -1.69186400 |
| H | 8.24675900  | -1.54457900 | -3.20332900 | H           | -5.96355800 | -1.10129000 | -2.31894800 |
| H | 9.74235100  | -3.49267800 | -2.80911800 | C           | -7.55815600 | -3.98720700 | -0.30709200 |
| H | 8.86036000  | -5.50557400 | -1.64340800 | H           | -5.56314000 | -4.61918300 | 0.12855300  |
| H | 6.50308100  | -5.56748800 | -0.88633500 | C           | -8.37669700 | -3.06550800 | -0.96283800 |
| H | 3.61139300  | -1.79405100 | 1.40647800  | H           | -8.41557800 | -1.30600800 | -2.21145100 |
| H | 3.78337900  | -3.54562700 | 1.37171000  | H           | -8.00022600 | -4.80585500 | 0.25368600  |
| H | 6.05457400  | -0.66859600 | 0.38609500  | H           | -9.45755900 | -3.15868100 | -0.91061500 |
| H | 8.33322200  | -0.39685600 | 1.31966800  | H           | -1.42393800 | 1.62807400  | 3.02232500  |
| H | 9.22528900  | -2.06041300 | 2.94108700  | H           | -0.64393000 | 1.43551100  | 5.35113000  |
| H | 7.81725600  | -3.99864900 | 3.61484800  | H           | 1.72734500  | -3.93940200 | -2.59537800 |
| H | 5.53782600  | -4.25878700 | 2.68017900  | H           | 2.07325000  | -5.46311100 | -1.81384900 |
| C | -3.80229500 | -1.92616100 | 1.20807900  | H           | 0.36380200  | -4.21509500 | 0.06683500  |
| H | -4.57731900 | -2.66305900 | 1.41298600  | H           | 2.09867700  | -4.36979500 | 0.18011200  |
| N | -3.11406700 | -2.45244900 | -0.09859400 |             |             |             |             |
| C | -4.07370000 | -2.65729200 | -1.29650300 |             |             |             |             |
| H | -3.93341200 | -1.77529900 | -1.92144800 |             |             |             |             |
| C | -2.35316000 | -3.74304300 | 0.24454800  |             |             |             |             |
| H | -1.68668300 | -3.46511000 | 1.06234800  |             |             |             |             |
|   |             |             |             | <b>TS3'</b> |             |             |             |
|   |             |             |             | C           | -5.29752600 | -0.43324200 | -2.76206500 |
|   |             |             |             | C           | -6.23830900 | -1.08586300 | -3.57175500 |
|   |             |             |             | C           | -5.95365500 | -1.20864400 | -4.93510100 |

|   |             |             |             |    |             |             |             |
|---|-------------|-------------|-------------|----|-------------|-------------|-------------|
| C | -4.78449100 | -0.67358700 | -5.47479300 | C  | -3.89678800 | -2.66936300 | 5.11887400  |
| C | -3.87972900 | -0.00420000 | -4.65430700 | H  | -4.84924300 | -0.85116500 | 4.47612900  |
| C | -4.10993100 | 0.12708900  | -3.27546000 | C  | -3.01861900 | -4.08624800 | 3.37289400  |
| H | -6.65273300 | -1.71615500 | -5.59038000 | H  | -3.24405300 | -3.36205300 | 1.36271100  |
| H | -4.58260500 | -0.77236300 | -6.53730000 | C  | -3.24428500 | -3.83952600 | 4.73094700  |
| H | -2.97311400 | 0.40721600  | -5.08562600 | H  | -4.08291400 | -2.47203500 | 6.17125100  |
| C | -7.54689400 | -1.54628000 | -2.91901600 | H  | -2.51696500 | -4.99835100 | 3.06007300  |
| C | -8.26249400 | -2.62150700 | -3.75456700 | H  | -2.91572400 | -4.55624100 | 5.47833600  |
| H | -9.20772200 | -2.91076400 | -3.28633500 | Pd | -3.03790400 | 0.08458700  | -0.05287400 |
| H | -7.64856800 | -3.51994000 | -3.87960800 | C  | 0.20310400  | -0.13822500 | 0.41185000  |
| H | -8.51687600 | -2.23547700 | -4.74588700 | H  | -0.64249500 | 0.31704400  | 0.92283300  |
| C | -8.48871000 | -0.31268100 | -2.79173900 | N  | 0.55718500  | -1.36243300 | 0.78614100  |
| H | -9.42482900 | -0.60090700 | -2.30048100 | C  | 1.23741900  | -2.26502800 | -0.16805800 |
| H | -8.72532800 | 0.08682500  | -3.78425800 | H  | 2.17553100  | -2.62291100 | 0.26696700  |
| H | -8.02557500 | 0.48536000  | -2.20363700 | C  | 0.07759600  | -1.94440300 | 2.06475700  |
| C | -7.20952000 | -2.04232400 | -1.50784500 | H  | -0.91865800 | -1.53532500 | 2.25473900  |
| C | -7.87412300 | -3.09202000 | -0.86720600 | H  | -0.06040900 | -3.01325800 | 1.87550100  |
| C | -6.21933800 | -1.35570300 | -0.78881100 | H  | 0.32066900  | 0.09673200  | -0.63877200 |
| C | -7.57827800 | -3.42853400 | 0.45323500  | H  | 1.50008400  | -1.65826600 | -1.04070200 |
| H | -8.63982400 | -3.64981900 | -1.39468400 | C  | 0.96276800  | -1.73748900 | 3.28108300  |
| C | -5.88928500 | -1.67332100 | 0.54500200  | C  | 0.38236900  | -1.26757400 | 4.46722500  |
| C | -6.60207700 | -2.72171000 | 1.15048500  | C  | 2.32580400  | -2.07118900 | 3.28404100  |
| H | -8.11128200 | -4.24037800 | 0.93924800  | C  | 1.14620200  | -1.12341500 | 5.62836400  |
| H | -6.37556600 | -2.99627400 | 2.17527000  | H  | -0.67870800 | -1.02895300 | 4.48827500  |
| O | -5.54511300 | -0.31788400 | -1.40645300 | C  | 3.09222700  | -1.91807100 | 4.44035000  |
| P | -2.91600100 | 1.01221900  | -2.16376300 | H  | 2.80507300  | -2.46294500 | 2.39151500  |
| P | -4.55478900 | -0.76894000 | 1.46867200  | C  | 2.50444400  | -1.44397000 | 5.61671600  |
| C | -3.50540700 | 2.76388800  | -2.23798400 | H  | 0.67799300  | -0.76042500 | 6.53886300  |
| C | -3.93622000 | 3.36975100  | -3.42957300 | H  | 4.14523700  | -2.18457800 | 4.41907500  |
| C | -3.53677200 | 3.50940600  | -1.04922400 | H  | 3.09967600  | -1.33393500 | 6.51876600  |
| C | -4.37291300 | 4.69491100  | -3.43196000 | C  | 0.37586500  | -3.44090700 | -0.59961700 |
| H | -3.94007300 | 2.80489000  | -4.35724600 | C  | -0.97692900 | -3.27060500 | -0.93166100 |
| C | -3.97413900 | 4.83645700  | -1.05234100 | C  | 0.95266200  | -4.71000100 | -0.72471300 |
| H | -3.24217400 | 3.03011500  | -0.11862400 | C  | -1.73102700 | -4.35370600 | -1.38610100 |
| C | -4.39055400 | 5.43130100  | -2.24425600 | H  | -1.45500100 | -2.29745800 | -0.81989200 |
| H | -4.70555900 | 5.15088800  | -4.36040600 | C  | 0.19909700  | -5.79191100 | -1.18630100 |
| H | -4.00440400 | 5.39788000  | -0.12232800 | H  | 1.99967600  | -4.85550800 | -0.46820900 |
| H | -4.73795600 | 6.46076300  | -2.24810600 | C  | -1.14464600 | -5.61580500 | -1.51782100 |
| C | -1.35278500 | 1.02144000  | -3.16105300 | H  | -2.77791000 | -4.20866500 | -1.63911000 |
| C | -0.72270600 | -0.21051800 | -3.42533600 | H  | 0.66179300  | -6.77021600 | -1.27976900 |
| C | -0.70235300 | 2.20126900  | -3.55217500 | H  | -1.73342000 | -6.45647400 | -1.87346100 |
| C | 0.51183700  | -0.25801200 | -4.07255200 | C  | 6.65004100  | 3.68006700  | -1.09791700 |
| H | -1.20805300 | -1.13906000 | -3.13484100 | C  | 6.32550200  | 2.29612700  | -1.70515200 |
| C | 0.54196200  | 2.15246100  | -4.19028400 | C  | 5.98633600  | 1.19498200  | -0.70387800 |
| H | -1.16633000 | 3.16453600  | -3.36689900 | C  | 4.74380000  | 0.91538000  | -0.38627600 |
| C | 1.15233300  | 0.92635600  | -4.45367100 | C  | 3.52188300  | 0.56614200  | -0.04859100 |
| H | 0.96998800  | -1.22018100 | -4.28745200 | H  | 3.02588700  | -0.21296200 | -0.62668200 |
| H | 1.02620700  | 3.07833900  | -4.48890400 | C  | 2.80887300  | 1.07166100  | 1.18314400  |
| H | 2.11380400  | 0.89013100  | -4.95818500 | H  | 2.76008600  | 0.26756100  | 1.92825100  |
| C | -5.46736100 | 0.55152600  | 2.38525300  | H  | 3.38118500  | 1.88802800  | 1.63377200  |
| C | -6.83882900 | 0.48014400  | 2.67309800  | C  | 7.81530600  | 3.71933300  | -0.11489800 |
| C | -4.74203500 | 1.67257000  | 2.82192200  | H  | 8.01072600  | 4.76426600  | 0.16876700  |
| C | -7.46711500 | 1.50531100  | 3.38347100  | H  | 7.55464200  | 3.17320300  | 0.80590400  |
| H | -7.42105200 | -0.37331200 | 2.34008000  | O  | 8.95743800  | 3.14263200  | -0.74484700 |
| C | -5.36793300 | 2.69008400  | 3.54283700  | H  | 9.72716800  | 3.27863300  | -0.17171400 |
| H | -3.68342800 | 1.74579400  | 2.58359700  | N  | 7.69583000  | -0.72570400 | -0.83469400 |
| C | -6.73403600 | 2.60946000  | 3.82240200  | C  | 7.12529600  | 0.37255800  | -0.05471100 |
| H | -8.53100500 | 1.43918000  | 3.59415700  | C  | 8.51643200  | -0.33391600 | -1.98777200 |
| H | -4.79250600 | 3.54916600  | 3.87757900  | C  | 9.55978100  | -1.37721200 | -2.35004400 |
| H | -7.22563300 | 3.40517000  | 4.37516700  | C  | 10.44574400 | -1.86696400 | -1.37969300 |
| C | -4.10327100 | -1.98422300 | 2.79406900  | C  | 11.43009200 | -2.79407200 | -1.71842300 |
| C | -4.32921700 | -1.74904300 | 4.15818000  | C  | 11.54539300 | -3.24693600 | -3.03626100 |
| C | -3.43459500 | -3.16290900 | 2.41471100  | C  | 10.66893400 | -2.76736400 | -4.00958400 |



|           |             |             |             |   |             |             |             |
|-----------|-------------|-------------|-------------|---|-------------|-------------|-------------|
| C         | 9.68185600  | -1.83997600 | -3.66498000 | C | -1.31059400 | 0.29968200  | 0.10410600  |
| C         | 6.79003200  | -1.83314300 | -1.11726800 | H | -1.54737600 | 1.04027500  | 0.87081800  |
| C         | 6.39397500  | -2.65100200 | 0.10245600  | C | -2.37355900 | 0.10432400  | -0.95606500 |
| C         | 7.23438400  | -2.76616800 | 1.21632000  | H | -2.46174300 | 1.02938000  | -1.53833400 |
| C         | 6.88107900  | -3.57582200 | 2.29830800  | H | -2.06072700 | -0.69144600 | -1.65817300 |
| C         | 5.68564300  | -4.29721300 | 2.27887300  | C | 1.45345300  | -3.76194300 | -1.22864900 |
| C         | 4.84434500  | -4.19844500 | 1.16681700  | H | 1.02981000  | -4.62965800 | -1.75947400 |
| C         | 5.19366500  | -3.37474500 | 0.09444700  | H | 1.37620000  | -2.89599700 | -1.90317100 |
| H         | 7.94775400  | 1.05252300  | 0.18245700  | O | 2.80693800  | -4.00932400 | -0.85685800 |
| H         | 6.75117100  | -0.04864100 | 0.88294000  | H | 3.38441100  | -3.85552700 | -1.61881100 |
| H         | 7.90670200  | -0.12052900 | -2.88425900 | N | 3.18608200  | 0.40860300  | 0.16949600  |
| H         | 9.01428200  | 0.60562900  | -1.71993900 | C | 2.18261500  | -0.32240400 | -0.61678300 |
| H         | 10.35414700 | -1.51693900 | -0.35504100 | C | 4.25521000  | -0.39364200 | 0.76972200  |
| H         | 12.11102000 | -3.16300900 | -0.95582300 | C | 5.15696300  | -1.04728000 | -0.26384700 |
| H         | 12.31327400 | -3.96898000 | -3.30007100 | C | 5.71902400  | -0.28365700 | -1.29728300 |
| H         | 10.74900200 | -3.11560900 | -5.03588400 | C | 6.57663400  | -0.86676000 | -2.22965800 |
| H         | 9.00046800  | -1.46869000 | -4.42787900 | C | 6.88812200  | -2.22699000 | -2.14441200 |
| H         | 5.87582000  | -1.50038400 | -1.64323900 | C | 6.33420800  | -2.99668900 | -1.12028600 |
| H         | 7.31679400  | -2.49763700 | -1.81342500 | C | 5.47287200  | -2.40882200 | -0.18820700 |
| H         | 8.17093800  | -2.21747600 | 1.22142500  | C | 2.62197200  | 1.41513500  | 1.06901300  |
| H         | 7.54882500  | -3.65391100 | 3.15239500  | C | 3.60160000  | 2.52502800  | 1.40800700  |
| H         | 5.41815000  | -4.94058400 | 3.11267800  | C | 4.23897500  | 3.24560500  | 0.38710900  |
| H         | 3.92222300  | -4.77475300 | 1.13411900  | C | 5.11149100  | 4.28985500  | 0.68965800  |
| H         | 4.54029600  | -3.30926800 | -0.77426800 | C | 5.36188800  | 4.63270200  | 2.02205400  |
| N         | 1.39929400  | 1.49889100  | 0.96939600  | C | 4.73409200  | 3.92298700  | 3.04561000  |
| C         | 0.73944700  | 1.92647200  | 2.25480700  | C | 3.86129500  | 2.87561600  | 2.73731500  |
| H         | -0.23297000 | 2.34136800  | 1.97160900  | H | 2.71813200  | -1.10380400 | -1.16511600 |
| C         | 1.15841400  | 2.39737300  | -0.19919500 | H | 1.77152200  | 0.37598900  | -1.35513800 |
| H         | 0.09362300  | 2.30258000  | -0.43831500 | H | 4.85798200  | 0.29831200  | 1.37084800  |
| H         | 1.71337100  | 1.95654200  | -1.03336000 | H | 3.88335600  | -1.16029200 | 1.47126700  |
| H         | 0.55479000  | 1.00181000  | 2.80979900  | H | 5.47102700  | 0.77160000  | -1.36431300 |
| C         | 1.48599100  | 3.87399000  | -0.09247800 | H | 7.00545100  | -0.25951900 | -3.02299800 |
| C         | 0.45243000  | 4.81163600  | -0.22845100 | H | 7.55784200  | -2.68143700 | -2.87003100 |
| C         | 2.79953300  | 4.34046600  | 0.05940800  | H | 6.57071500  | -4.05510900 | -1.04268800 |
| C         | 0.71854600  | 6.18227700  | -0.19151800 | H | 5.03126200  | -3.01809400 | 0.59535300  |
| H         | -0.56969500 | 4.46888000  | -0.37657200 | H | 1.75392800  | 1.84839800  | 0.55582700  |
| C         | 3.06605100  | 5.70819200  | 0.10843500  | H | 2.23023400  | 0.97717700  | 2.00525600  |
| H         | 3.61934000  | 3.63287600  | 0.13279000  | H | 4.04524200  | 2.97481600  | -0.64743600 |
| C         | 2.02674100  | 6.63404800  | -0.01408900 | H | 5.59587700  | 4.83984200  | -0.11331400 |
| H         | -0.09521800 | 6.89334400  | -0.30416000 | H | 6.04254000  | 5.44643900  | 2.25818900  |
| H         | 4.08848300  | 6.05378100  | 0.23458200  | H | 4.92508800  | 4.17918400  | 4.08458600  |
| H         | 2.23805500  | 7.69913500  | 0.01799600  | H | 3.37573300  | 2.32293600  | 3.53894300  |
| C         | 1.46302300  | 2.88578500  | 3.18827800  | N | -3.69624900 | -0.15981900 | -0.37499200 |
| C         | 1.16712800  | 4.25561200  | 3.20420500  | C | -4.76687100 | 0.01286300  | -1.36433100 |
| C         | 2.37583300  | 2.38849900  | 4.13252300  | H | -4.59836300 | -0.61975100 | -2.25830400 |
| C         | 1.78670100  | 5.11033000  | 4.11652400  | C | -3.76146500 | -1.47865300 | 0.26441000  |
| H         | 0.45076400  | 4.66068500  | 2.49693000  | H | -2.83206900 | -1.60075700 | 0.83287400  |
| C         | 3.00340200  | 3.24271800  | 5.04003500  | H | -3.77848300 | -2.29492800 | -0.48485900 |
| H         | 2.58426300  | 1.32259700  | 4.17472700  | H | -5.69103500 | -0.35028800 | -0.89902600 |
| C         | 2.71257800  | 4.60808600  | 5.03249300  | C | -4.94255600 | -1.63131500 | 1.20380700  |
| H         | 1.54199100  | 6.16875800  | 4.11215200  | C | -5.17470200 | -0.68184500 | 2.20989800  |
| H         | 3.70706300  | 2.83811700  | 5.76235600  | C | -5.79797900 | -2.73500300 | 1.11360000  |
| H         | 3.19408700  | 5.27338000  | 5.74376900  | C | -6.23372100 | -0.83605200 | 3.10334600  |
| H         | 5.48451300  | 2.42566900  | -2.39558500 | H | -4.51886600 | 0.18156400  | 2.27943200  |
| H         | 7.18246600  | 1.97852200  | -2.30434700 | C | -6.85872300 | -2.89495300 | 2.00943000  |
| H         | 6.87271500  | 4.36061500  | -1.92920200 | H | -5.63171400 | -3.47675800 | 0.33505700  |
| H         | 5.76443100  | 4.07826100  | -0.58750600 | C | -7.07954000 | -1.94516900 | 3.00698000  |
| <b>3'</b> |             |             |             | H | -6.39981300 | -0.09163300 | 3.87802600  |
| C         | 0.65645300  | -3.50097300 | 0.04530700  | H | -7.51325300 | -3.75847300 | 1.92292200  |
| C         | 1.15232400  | -2.28905500 | 0.86294300  | H | -7.90511900 | -2.06522600 | 3.70354000  |
| C         | 0.99800800  | -0.95093900 | 0.14056400  | C | -4.96417500 | 1.45343000  | -1.79597500 |
| C         | -0.16011500 | -0.32970900 | 0.13440300  | C | -5.04155100 | 1.79300500  | -3.15139000 |
|           |             |             |             | C | -5.11260800 | 2.46833200  | -0.83925800 |

|   |             |             |             |
|---|-------------|-------------|-------------|
| C | -5.26978800 | 3.11337000  | -3.54800000 |
| H | -4.92264300 | 1.01610500  | -3.90382800 |
| C | -5.33637200 | 3.78746100  | -1.23130600 |
| H | -5.04393700 | 2.21195100  | 0.21400300  |
| C | -5.41740800 | 4.11484200  | -2.58815500 |
| H | -5.32629400 | 3.35769800  | -4.60569200 |
| H | -5.44997000 | 4.56274800  | -0.47768400 |
| H | -5.59216700 | 5.14336900  | -2.89284500 |
| H | 0.59349600  | -2.25895900 | 1.80537300  |
| H | 2.20222800  | -2.45537400 | 1.11609700  |
| H | 0.71271100  | -4.39714300 | 0.67719800  |
| H | -0.39838700 | -3.35881100 | -0.22309800 |

### 3-DME

|   |             |             |             |
|---|-------------|-------------|-------------|
| C | -0.34811000 | -3.03429900 | -4.15756400 |
| C | -0.40951200 | -3.14049200 | -2.76900100 |
| C | -0.03644400 | -2.07813600 | -1.93540500 |
| C | 0.41787100  | -0.86989500 | -2.51874700 |
| C | 0.47506200  | -0.78258900 | -3.92275700 |
| C | 0.09674600  | -1.84668200 | -4.73855800 |
| H | -0.64230200 | -3.87520900 | -4.78021100 |
| H | -0.73376700 | -4.06373200 | -2.30227300 |
| H | 0.79719900  | 0.14624900  | -4.38475200 |
| H | 0.14824400  | -1.74474400 | -5.81946800 |
| C | 0.80693200  | 0.33288900  | -1.71627800 |
| C | 0.04040000  | 0.76836100  | -0.73759000 |
| C | -0.72701800 | 1.25324200  | 0.20720600  |
| H | -0.55038900 | 0.94762000  | 1.24035000  |
| C | -1.86999000 | 2.23923600  | -0.03118300 |
| H | -1.74872100 | 3.08578200  | 0.65355300  |
| H | -1.80788000 | 2.62670900  | -1.05092400 |
| C | -0.11445400 | -2.26860600 | -0.43460500 |
| H | 0.73014600  | -1.75104400 | 0.03940700  |
| H | -1.03120900 | -1.79294900 | -0.04845500 |
| O | -0.10664200 | -3.65454400 | -0.12371400 |
| H | -0.10711000 | -3.72383500 | 0.85161100  |
| N | 3.25501500  | 1.11742500  | -1.29230200 |
| C | 2.05865900  | 1.16537100  | -2.11738800 |
| C | 4.24071700  | 0.05001000  | -1.49405000 |
| C | 4.15358100  | -1.18708300 | -0.60399300 |
| C | 4.90618300  | -1.25848500 | 0.57766300  |
| C | 4.84949800  | -2.38699600 | 1.39816100  |
| C | 4.03502900  | -3.46633900 | 1.04736400  |
| C | 3.28216600  | -3.41119700 | -0.12879400 |
| C | 3.35075200  | -2.28219600 | -0.94783000 |
| C | 3.15301900  | 1.66449700  | 0.05095500  |
| C | 4.40060300  | 2.41660800  | 0.49931700  |
| C | 4.81665500  | 2.36585100  | 1.83518900  |
| C | 5.92113300  | 3.10211700  | 2.27055800  |
| C | 6.63149400  | 3.89616200  | 1.36879100  |
| C | 6.22871600  | 3.94823200  | 0.03169300  |
| C | 5.12161400  | 3.21569500  | -0.39756200 |
| H | 2.35520800  | 0.86902400  | -3.12781300 |
| H | 1.74638800  | 2.21560800  | -2.16952600 |
| H | 4.17512600  | -0.25130800 | -2.54540000 |
| H | 5.23580900  | 0.49284200  | -1.35228800 |
| H | 5.54794100  | -0.42425000 | 0.85155500  |
| H | 5.44765800  | -2.42589300 | 2.30539700  |
| H | 3.99827200  | -4.35119100 | 1.67848400  |
| H | 2.62707700  | -4.23170600 | -0.40518400 |
| H | 2.77106400  | -2.25579400 | -1.86608400 |
| H | 2.30589600  | 2.36201700  | 0.05123100  |
| H | 2.90805300  | 0.89722400  | 0.80461400  |

|   |             |             |             |
|---|-------------|-------------|-------------|
| H | 4.26990200  | 1.74307100  | 2.54045800  |
| H | 6.22931300  | 3.04983700  | 3.31180000  |
| H | 7.49430100  | 4.46625700  | 1.70321000  |
| H | 6.77834600  | 4.56168700  | -0.67800900 |
| H | 4.80797200  | 3.24578700  | -1.43750600 |
| N | -3.22910000 | 1.70940200  | 0.16067200  |
| C | -3.50084700 | 1.23540100  | 1.52028400  |
| H | -4.52961500 | 0.84944700  | 1.51755800  |
| C | -3.61633100 | 0.72649700  | -0.85722300 |
| H | -4.59628400 | 0.33145500  | -0.55617600 |
| H | -2.92890600 | -0.13755200 | -0.88775800 |
| H | -2.85927400 | 0.38246100  | 1.81217600  |
| C | -3.73423500 | 1.31944400  | -2.25009900 |
| C | -4.46689800 | 2.49585800  | -2.46417400 |
| C | -3.15092900 | 0.67966100  | -3.34944000 |
| C | -4.61613800 | 3.01652400  | -3.74904700 |
| H | -4.90799600 | 3.00356000  | -1.61078900 |
| C | -3.30293300 | 1.19685800  | -4.63873400 |
| H | -2.56982400 | -0.22654600 | -3.19824500 |
| C | -4.03606600 | 2.36620700  | -4.84245800 |
| H | -5.18686100 | 3.92964700  | -3.89929200 |
| H | -2.83982800 | 0.68669000  | -5.47933900 |
| H | -4.15322300 | 2.77169300  | -5.84416900 |
| C | -3.38974300 | 2.32353600  | 2.57288700  |
| C | -4.02593800 | 3.55999500  | 2.39005400  |
| C | -2.68797400 | 2.09924500  | 3.76242400  |
| C | -3.96179500 | 4.54476600  | 3.37488300  |
| H | -4.56033000 | 3.74327600  | 1.46208700  |
| C | -2.62592400 | 3.08191500  | 4.75410200  |
| H | -2.18764900 | 1.14516400  | 3.91595600  |
| C | -3.26271400 | 4.30813300  | 4.56239000  |
| H | -4.45898100 | 5.49863700  | 3.21777000  |
| H | -2.07590900 | 2.88974100  | 5.67173400  |
| H | -3.21371200 | 5.07590600  | 5.33001200  |
| O | -3.78573700 | -4.64144900 | 2.69227400  |
| C | -2.63606900 | -3.95886600 | 2.24062300  |
| H | -2.38869400 | -4.22466700 | 1.20062900  |
| H | -2.78088300 | -2.86563500 | 2.27896000  |
| C | -4.92664600 | -4.36931100 | 1.90672000  |
| H | -5.75400400 | -4.94454000 | 2.33027000  |
| H | -5.18815400 | -3.29888600 | 1.92603400  |
| H | -4.77935800 | -4.67067900 | 0.85749100  |
| C | -1.48866600 | -4.35717100 | 3.15946700  |
| H | -1.71046500 | -4.05560100 | 4.19398500  |
| H | -1.36057900 | -5.45011000 | 3.14477200  |
| O | -0.31174800 | -3.70672900 | 2.69714100  |
| C | 0.83362900  | -3.98489500 | 3.48683500  |
| H | 1.67837600  | -3.47712700 | 3.01612800  |
| H | 0.70366200  | -3.60952800 | 4.51227000  |
| H | 1.03706600  | -5.06530400 | 3.52942200  |

### TS6

|   |            |             |             |
|---|------------|-------------|-------------|
| C | 6.24333300 | -1.16697900 | -1.67217000 |
| C | 7.42336000 | -0.98472800 | -2.40761700 |
| C | 7.48235500 | -1.52914500 | -3.69417100 |
| C | 6.41046500 | -2.25213400 | -4.21582800 |
| C | 5.25871900 | -2.43977200 | -3.45509900 |
| C | 5.14234900 | -1.89555700 | -2.16600700 |
| H | 8.37516900 | -1.40089500 | -4.29600800 |
| H | 6.47563600 | -2.67516100 | -5.21396000 |
| H | 4.43147100 | -3.00479800 | -3.87130900 |
| C | 8.59239300 | -0.26950000 | -1.72040300 |
| C | 9.61525100 | 0.27241100  | -2.73347700 |

|   |             |             |             |    |             |             |             |
|---|-------------|-------------|-------------|----|-------------|-------------|-------------|
| H | 10.45354400 | 0.75134800  | -2.21932900 | Pd | 3.33861600  | -0.28391000 | 0.22494900  |
| H | 9.16794800  | 1.00010100  | -3.41919700 | C  | 0.52507500  | 1.64273000  | 0.19539500  |
| H | 10.04303900 | -0.54218700 | -3.32494800 | H  | 0.80805900  | 2.14766500  | 1.10772600  |
| C | 9.31254800  | -1.29062500 | -0.79120200 | N  | 0.21142300  | 2.40498800  | -0.85121200 |
| H | 10.13733100 | -0.80251000 | -0.25990100 | C  | 0.28297400  | 1.85649400  | -2.22929400 |
| H | 9.72095700  | -2.11744000 | -1.38305200 | H  | -0.66471600 | 2.06462900  | -2.73509600 |
| H | 8.62664700  | -1.70835900 | -0.04813700 | C  | -0.02456100 | 3.86949000  | -0.72536000 |
| C | 8.00153800  | 0.84307800  | -0.84653300 | H  | 0.28861300  | 4.15850100  | 0.28034600  |
| C | 8.62494600  | 2.07266700  | -0.61391800 | H  | 0.66548100  | 4.34710900  | -1.42935100 |
| C | 6.79388000  | 0.58289800  | -0.18146400 | H  | 1.07556800  | 0.72437600  | -0.01701300 |
| C | 8.07568100  | 2.99841700  | 0.27235700  | H  | 0.37146400  | 0.77115300  | -2.13636000 |
| H | 9.55555300  | 2.31120400  | -1.11673400 | C  | -1.44353600 | 4.33403400  | -0.99430500 |
| C | 6.20828400  | 1.49706800  | 0.71866100  | C  | -2.32042600 | 4.59831700  | 0.06759500  |
| C | 6.88613600  | 2.70790700  | 0.93598700  | C  | -1.89237300 | 4.55223400  | -2.30502300 |
| H | 8.57854100  | 3.94449700  | 0.44999900  | C  | -3.62774300 | 5.02356000  | -0.17566500 |
| H | 6.46868500  | 3.43644800  | 1.62271700  | H  | -1.97478500 | 4.49039700  | 1.09322000  |
| O | 6.15376400  | -0.62154900 | -0.40367900 | C  | -3.20009400 | 4.97378300  | -2.55054200 |
| P | 3.60121700  | -2.11815400 | -1.15334800 | H  | -1.20815400 | 4.41640100  | -3.13810000 |
| P | 4.59981900  | 1.12003500  | 1.56875400  | C  | -4.07570700 | 5.20189700  | -1.48651800 |
| C | 3.93151800  | -3.68055700 | -0.22254400 | H  | -4.29602300 | 5.22507500  | 0.65655200  |
| C | 4.77652600  | -4.69203500 | -0.70654800 | H  | -3.53120400 | 5.13623900  | -3.57238300 |
| C | 3.29942500  | -3.86233100 | 1.01768400  | H  | -5.09410700 | 5.52931400  | -1.67339400 |
| C | 4.97640700  | -5.85999700 | 0.03156400  | C  | 1.44222000  | 2.41008300  | -3.03954400 |
| H | 5.28492800  | -4.56758700 | -1.65785900 | C  | 2.76614000  | 2.21257900  | -2.61559700 |
| C | 3.49295100  | -5.03424700 | 1.75069200  | C  | 1.20903500  | 3.08394500  | -4.24431700 |
| H | 2.66478900  | -3.07368400 | 1.41263000  | C  | 3.83023700  | 2.69612800  | -3.37747300 |
| C | 4.33347100  | -6.03481600 | 1.25920000  | H  | 2.97140900  | 1.65525700  | -1.69955400 |
| H | 5.63670800  | -6.63273200 | -0.35266600 | C  | 2.27479400  | 3.56626800  | -5.00908200 |
| H | 2.99613600  | -5.15921800 | 2.70897600  | H  | 0.18949100  | 3.22109300  | -4.59782900 |
| H | 4.49294500  | -6.94385900 | 1.83255500  | C  | 3.58659700  | 3.37794300  | -4.57369600 |
| C | 2.35673600  | -2.62248500 | -2.43221200 | H  | 4.84974300  | 2.52848100  | -3.04115000 |
| C | 1.87427800  | -1.63129600 | -3.30736100 | H  | 2.07752500  | 4.08691400  | -5.94179500 |
| C | 1.82913900  | -3.91766300 | -2.52851800 | H  | 4.41632100  | 3.75273000  | -5.16618100 |
| C | 0.89928500  | -1.93117700 | -4.25777200 | C  | -3.41608000 | -4.98243400 | -0.41594000 |
| H | 2.27925600  | -0.62319400 | -3.25430800 | C  | -4.17467200 | -4.29159600 | 0.52810800  |
| C | 0.84414300  | -4.21482400 | -3.47673600 | C  | -4.05244800 | -2.90655300 | 0.69421100  |
| H | 2.18889000  | -4.70138800 | -1.86983600 | C  | -3.13457200 | -2.20000900 | -0.11632700 |
| C | 0.37631100  | -3.22612100 | -4.34255300 | C  | -2.37916800 | -2.90857800 | -1.06669100 |
| H | 0.55056100  | -1.15660600 | -4.93600900 | C  | -2.51142000 | -4.28696800 | -1.21843200 |
| H | 0.45383800  | -5.22708000 | -3.54343800 | H  | -3.53146200 | -6.05790800 | -0.52217300 |
| H | -0.38386000 | -3.46087900 | -5.08233700 | H  | -4.86597700 | -4.82019900 | 1.17399100  |
| C | 5.12365500  | 0.30671700  | 3.14317400  | H  | -1.69498900 | -2.37469500 | -1.72128300 |
| C | 6.37636200  | 0.52555700  | 3.73758300  | H  | -1.91318100 | -4.80566300 | -1.96221900 |
| C | 4.21749200  | -0.56225800 | 3.77218100  | C  | -2.98819300 | -0.70846200 | -0.06267700 |
| C | 6.71007400  | -0.10699300 | 4.93671900  | C  | -4.05194500 | 0.06942600  | -0.15073000 |
| H | 7.09620100  | 1.18544600  | 3.26298400  | C  | -5.08625800 | 0.85904600  | -0.27515300 |
| C | 4.54853000  | -1.18627700 | 4.97572900  | H  | -5.57574700 | 1.23314800  | 0.62623100  |
| H | 3.25655500  | -0.75893400 | 3.30334800  | C  | -5.66183500 | 1.32755200  | -1.61465900 |
| C | 5.79694100  | -0.96085200 | 5.55925000  | H  | -5.55178300 | 2.41630700  | -1.67114300 |
| H | 7.68531000  | 0.06688300  | 5.38325400  | H  | -5.07595800 | 0.89247000  | -2.42799200 |
| H | 3.83712800  | -1.85686100 | 5.45009800  | C  | -4.90758500 | -2.21678500 | 1.74278100  |
| H | 6.06031000  | -1.45349400 | 6.49112200  | H  | -4.30287900 | -1.44553400 | 2.24633700  |
| C | 4.05169400  | 2.80779900  | 2.11783800  | H  | -5.73871100 | -1.68813900 | 1.25029600  |
| C | 4.03454500  | 3.21315600  | 3.46015500  | O  | -5.40144900 | -3.16023500 | 2.67395300  |
| C | 3.57889300  | 3.70345700  | 1.13989900  | H  | -6.21331700 | -2.78807500 | 3.07332000  |
| C | 3.56392700  | 4.48192300  | 3.81573300  | N  | -0.97952200 | 0.57464500  | 1.08706400  |
| H | 4.39883700  | 2.54450700  | 4.23318700  | C  | -1.60155500 | -0.05011700 | -0.13451000 |
| C | 3.12164900  | 4.97283500  | 1.49397600  | C  | -0.18641400 | -0.34525700 | 1.97159300  |
| H | 3.58802400  | 3.41174700  | 0.09215500  | C  | -0.82557800 | -1.60900700 | 2.51328000  |
| C | 3.10955600  | 5.36630000  | 2.83696400  | C  | -1.62644100 | -1.59896900 | 3.66517300  |
| H | 3.57019500  | 4.78104700  | 4.86066400  | C  | -2.13738400 | -2.78759000 | 4.18712700  |
| H | 2.78650400  | 5.66102200  | 0.72192600  | C  | -1.83608000 | -4.00775300 | 3.57899900  |
| H | 2.75984500  | 6.35737300  | 3.11292500  | C  | -1.01819300 | -4.03391500 | 2.44930300  |

|   |              |             |             |
|---|--------------|-------------|-------------|
| C | -0.52078700  | -2.84252900 | 1.92016800  |
| C | -1.97608600  | 1.44805500  | 1.78707200  |
| C | -1.59793300  | 2.11349000  | 3.10111600  |
| C | -2.42564600  | 1.87277700  | 4.21084300  |
| C | -2.20678700  | 2.50258400  | 5.43668900  |
| C | -1.14446700  | 3.39454300  | 5.58355600  |
| C | -0.31974600  | 3.66020100  | 4.49000000  |
| C | -0.55102100  | 3.03587400  | 3.26264400  |
| H | -0.87105300  | -0.77161300 | -0.50803600 |
| H | -1.67324200  | 0.77004100  | -0.85185600 |
| H | 0.69989600   | -0.63281600 | 1.39227400  |
| H | 0.16445600   | 0.28016900  | 2.79691600  |
| H | -1.82866900  | -0.66094500 | 4.17212500  |
| H | -2.76460000  | -2.76306300 | 5.07343600  |
| H | -2.23579800  | -4.93157700 | 3.98640800  |
| H | -0.77476100  | -4.97787100 | 1.97117200  |
| H | 0.11523000   | -2.87363700 | 1.03932200  |
| H | -2.27262900  | 2.19995900  | 1.04763400  |
| H | -2.86458100  | 0.83942500  | 1.97242400  |
| H | -3.26287800  | 1.18693000  | 4.10894400  |
| H | -2.86639000  | 2.29419400  | 6.27425700  |
| H | -0.96551100  | 3.88320200  | 6.53683700  |
| H | 0.50728700   | 4.35781600  | 4.58096900  |
| H | 0.09897800   | 3.29674200  | 2.43596000  |
| N | -7.07143700  | 1.00946400  | -1.84684200 |
| C | -8.00178400  | 1.68438500  | -0.93748400 |
| H | -9.00787700  | 1.33333500  | -1.20269700 |
| C | -7.33885800  | -0.42934700 | -1.96526600 |
| H | -8.42588300  | -0.53773800 | -2.07504900 |
| H | -7.06148600  | -0.98248900 | -1.04917800 |
| H | -7.85410300  | 1.39649900  | 0.12071400  |
| C | -6.65375100  | -1.06665600 | -3.16016000 |
| C | -6.83717400  | -0.53801300 | -4.44645700 |
| C | -5.86046400  | -2.20900200 | -3.00764400 |
| C | -6.24560400  | -1.14329100 | -5.55428900 |
| H | -7.44411000  | 0.35500300  | -4.56936100 |
| C | -5.26826500  | -2.81955400 | -4.11682100 |
| H | -5.70176200  | -2.62706800 | -2.01655600 |
| C | -5.46030800  | -2.28915600 | -5.39260200 |
| H | -6.40158700  | -0.72612100 | -6.54584000 |
| H | -4.65485700  | -3.70533300 | -3.97600000 |
| H | -5.00435900  | -2.76388500 | -6.25750000 |
| C | -7.96582400  | 3.19804000  | -1.05128100 |
| C | -8.05132900  | 3.81967800  | -2.30556800 |
| C | -7.89624400  | 4.00086400  | 0.09296600  |
| C | -8.07297000  | 5.21040800  | -2.40998100 |
| H | -8.09676800  | 3.20111200  | -3.19743900 |
| C | -7.92150900  | 5.39498800  | -0.00636000 |
| H | -7.83411400  | 3.53149000  | 1.07277800  |
| C | -8.01043800  | 6.00404100  | -1.25940700 |
| H | -8.14999600  | 5.67735200  | -3.38850200 |
| H | -7.87837500  | 6.00262700  | 0.89380200  |
| H | -8.03933000  | 7.08731800  | -1.34025500 |
| O | -9.87586900  | -4.08340200 | 1.38702400  |
| C | -8.76124500  | -3.30390600 | 1.75405700  |
| H | -7.82039000  | -3.86865700 | 1.65525200  |
| H | -8.67725700  | -2.40277200 | 1.12174100  |
| C | -9.80273100  | -4.55912000 | 0.05871100  |
| H | -10.70467200 | -5.14900500 | -0.12099600 |
| H | -9.76485300  | -3.73150200 | -0.66774100 |
| H | -8.91850900  | -5.19735600 | -0.09564100 |
| C | -8.96516200  | -2.89539100 | 3.20663200  |
| H | -9.89424200  | -2.31623800 | 3.30779400  |

|   |             |             |            |
|---|-------------|-------------|------------|
| H | -9.05197200 | -3.79157000 | 3.83821300 |
| O | -7.84892200 | -2.10474200 | 3.60893500 |
| C | -7.94273500 | -1.66415300 | 4.95504400 |
| H | -7.04108600 | -1.08495800 | 5.16834900 |
| H | -8.82604000 | -1.02593300 | 5.09842000 |
| H | -8.00183600 | -2.51232600 | 5.65221400 |

#### HClO<sub>4</sub>

|    |             |             |             |
|----|-------------|-------------|-------------|
| Cl | -0.14963900 | 0.00527700  | 0.00010300  |
| O  | -0.41775400 | 0.76082300  | -1.22576800 |
| O  | -0.41467900 | 0.76264100  | 1.22559100  |
| O  | 1.54033500  | -0.24923600 | -0.00146900 |
| O  | -0.63071300 | -1.36714700 | 0.00168000  |
| H  | 1.92635700  | 0.65364700  | -0.00202100 |

#### INT5

|   |             |             |             |
|---|-------------|-------------|-------------|
| C | 2.08330100  | 2.34113700  | -0.02810400 |
| H | 2.59480100  | 2.99801700  | 0.67925300  |
| H | 2.82866400  | 1.88590800  | -0.67704500 |
| N | 1.07223800  | 2.99161200  | -0.80437800 |
| C | 0.61530200  | 4.30829400  | -0.30388000 |
| H | 0.56139200  | 4.25319600  | 0.78629600  |
| H | 1.35303900  | 5.09382000  | -0.53990700 |
| C | 1.38746500  | 3.06806300  | -2.26154300 |
| H | 2.38776000  | 3.50697100  | -2.40687800 |
| H | 0.66760900  | 3.77486700  | -2.68110200 |
| C | -0.74357100 | 4.71617300  | -0.84382500 |
| C | -1.85178300 | 3.86167600  | -0.73700600 |
| C | -0.91885500 | 5.97727800  | -1.42458600 |
| C | -3.10542400 | 4.26081100  | -1.20058500 |
| H | -1.73253900 | 2.87545300  | -0.29498900 |
| C | -2.17390600 | 6.38226900  | -1.88640100 |
| H | -0.06858100 | 6.64957300  | -1.51614400 |
| C | -3.26809000 | 5.52455100  | -1.77645400 |
| H | -3.95710900 | 3.59134200  | -1.11263800 |
| H | -2.29202600 | 7.36445200  | -2.33511600 |
| H | -4.24397300 | 5.83536600  | -2.13817900 |
| C | 1.28376200  | 1.75960600  | -3.01234800 |
| C | 0.02381600  | 1.23775300  | -3.34538500 |
| C | 2.42965300  | 1.05962700  | -3.40713200 |
| C | -0.08398600 | 0.03546800  | -4.04213400 |
| H | -0.87252300 | 1.78509000  | -3.06210100 |
| C | 2.32532900  | -0.14867900 | -4.10248900 |
| C | 1.06828300  | -0.66302200 | -4.41988100 |
| H | -1.06488000 | -0.35203900 | -4.30369100 |
| H | 0.98336600  | -1.59563900 | -4.97057600 |
| H | 3.41340000  | 1.46774300  | -3.18367600 |
| H | 3.22453700  | -0.67982100 | -4.39992300 |
| C | 1.61938100  | -4.42305200 | 2.44285100  |
| C | 1.94436800  | -4.12613200 | 1.11901800  |
| C | 1.44055300  | -2.98945600 | 0.47200900  |
| C | 0.58538000  | -2.12010900 | 1.18798800  |
| C | 0.25201400  | -2.43930300 | 2.51549800  |
| C | 0.76166000  | -3.57544700 | 3.14311300  |
| H | 2.01894400  | -5.31539400 | 2.91597300  |
| H | 2.59765100  | -4.79399100 | 0.56213500  |
| H | -0.43295800 | -1.79007000 | 3.05481300  |
| H | 0.48241100  | -3.79897200 | 4.16876800  |
| C | -0.04303100 | -0.89432400 | 0.58287800  |
| C | -1.35851400 | -0.76337600 | 0.59007400  |
| C | -2.65502400 | -0.60158800 | 0.55486100  |
| H | -3.16281600 | -0.14314000 | 1.40552200  |
| C | -3.55466200 | -0.95335200 | -0.61437700 |

|   |             |             |             |
|---|-------------|-------------|-------------|
| H | -3.79917100 | -0.02016800 | -1.13573800 |
| H | -3.01030700 | -1.59231700 | -1.33443700 |
| C | 1.85162600  | -2.73894600 | -0.96623900 |
| H | 2.04982700  | -3.69896600 | -1.46022200 |
| H | 1.05409700  | -2.24475300 | -1.52764700 |
| O | 3.00117800  | -1.88879200 | -1.06653400 |
| H | 3.78117600  | -2.41545100 | -0.77715500 |
| N | 1.57516600  | 1.14256800  | 0.85580900  |
| C | 0.74176700  | 0.22912900  | -0.07513000 |
| C | 2.78797500  | 0.31519600  | 1.39198400  |
| C | 4.15341400  | 0.96988400  | 1.41587200  |
| C | 5.00293500  | 0.79123100  | 0.30931900  |
| C | 6.29689000  | 1.31255300  | 0.31142500  |
| C | 6.76683600  | 2.00816000  | 1.42796000  |
| C | 5.94068700  | 2.16833100  | 2.54196100  |
| C | 4.64383400  | 1.65101500  | 2.53908900  |
| C | 0.66487400  | 1.64730400  | 1.98681100  |
| C | 1.31600100  | 2.22539600  | 3.22254400  |
| C | 1.74427300  | 3.55878100  | 3.31218200  |
| C | 2.28637900  | 4.05735500  | 4.49720100  |
| C | 2.40236200  | 3.23354700  | 5.61886200  |
| C | 1.96354000  | 1.90972700  | 5.55209900  |
| C | 1.42133500  | 1.41492700  | 4.36545100  |
| H | 1.46028800  | -0.13865000 | -0.80769100 |
| H | 0.05191900  | 0.90387800  | -0.57460600 |
| H | 2.49400100  | -0.02386600 | 2.38365400  |
| H | 2.84057100  | -0.54767500 | 0.73040200  |
| H | 4.64775400  | 0.22396200  | -0.54828800 |
| H | 6.94007800  | 1.16748200  | -0.55198700 |
| H | 7.77556100  | 2.41099000  | 1.43474800  |
| H | 6.30784200  | 2.69021300  | 3.42099500  |
| H | 4.02206100  | 1.76467300  | 3.41998100  |
| H | -0.01808300 | 2.35117000  | 1.50885400  |
| H | 0.07459000  | 0.77927700  | 2.27623600  |
| H | 1.65252500  | 4.22597400  | 2.46176600  |
| H | 2.60907800  | 5.09315200  | 4.54603300  |
| H | 2.81859000  | 3.62498000  | 6.54243700  |
| H | 2.03216100  | 1.26594200  | 6.42401500  |
| H | 1.06397400  | 0.38812500  | 4.32999300  |
| N | -4.81340000 | -1.54042400 | -0.16369300 |
| C | -5.86713100 | -1.42954000 | -1.18389800 |
| H | -5.56838300 | -1.91761500 | -2.13152500 |
| C | -4.63895600 | -2.92273300 | 0.30458200  |
| H | -3.73675500 | -2.93486900 | 0.92956100  |
| H | -4.44171400 | -3.61201500 | -0.53878500 |
| H | -6.73019800 | -1.98864200 | -0.80555300 |
| C | -5.81393700 | -3.43671200 | 1.11393900  |
| C | -6.29934900 | -2.70477000 | 2.20732600  |
| C | -6.40854300 | -4.66652400 | 0.81062100  |
| C | -7.35297500 | -3.19344100 | 2.97855300  |
| H | -5.84823100 | -1.74466600 | 2.44341800  |
| C | -7.46162700 | -5.16161400 | 1.58423200  |
| H | -6.04441400 | -5.24259200 | -0.03746700 |
| C | -7.93670400 | -4.42571500 | 2.66993000  |
| H | -7.71972800 | -2.61468100 | 3.82224300  |
| H | -7.91239900 | -6.11806600 | 1.33383900  |
| H | -8.75777300 | -4.80665800 | 3.27085800  |
| C | -6.27413100 | 0.00559600  | -1.45804300 |
| C | -6.33286100 | 0.49858900  | -2.76686900 |
| C | -6.62242400 | 0.85938800  | -0.40060000 |
| C | -6.73711300 | 1.81208600  | -3.02036700 |
| H | -6.06611000 | -0.15304300 | -3.59624200 |
| C | -7.02220100 | 2.17228400  | -0.64901300 |

|   |             |             |             |
|---|-------------|-------------|-------------|
| H | -6.57698300 | 0.48331000  | 0.61751500  |
| C | -7.08173100 | 2.65322500  | -1.96148600 |
| H | -6.78282500 | 2.17534200  | -4.04354800 |
| H | -7.29933600 | 2.81864800  | 0.17982700  |
| H | -7.40419800 | 3.67270500  | -2.15567700 |
| O | 6.50866000  | -3.78735000 | -3.70208000 |
| C | 5.50048800  | -3.80795800 | -2.71973300 |
| H | 4.73910100  | -3.03095200 | -2.90557400 |
| H | 4.98309700  | -4.78170400 | -2.69334600 |
| C | 6.02578500  | -4.07579500 | -4.99896000 |
| H | 6.88190200  | -4.03476500 | -5.67610000 |
| H | 5.57467900  | -5.07892800 | -5.04978000 |
| H | 5.27445300  | -3.33845500 | -5.32502900 |
| C | 6.18378500  | -3.55111700 | -1.38316500 |
| H | 6.89180300  | -4.36082000 | -1.16014500 |
| H | 6.74837100  | -2.60807700 | -1.42671500 |
| O | 5.17993100  | -3.48830500 | -0.37045600 |
| C | 5.71906100  | -3.31672900 | 0.93564000  |
| H | 4.87594900  | -3.30992300 | 1.62990400  |
| H | 6.39167900  | -4.14676100 | 1.18949200  |
| H | 6.27162800  | -2.37006300 | 1.01764500  |

#### -ClO<sub>4</sub>

|    |             |             |             |
|----|-------------|-------------|-------------|
| Cl | 0.00021000  | 0.00004900  | 0.00016700  |
| O  | -0.62838000 | -1.35875700 | 0.06939900  |
| O  | -0.13361300 | 0.54132600  | -1.39044600 |
| O  | 1.45175700  | -0.10147700 | 0.35919400  |
| O  | -0.69021000 | 0.91880400  | 0.96149900  |

#### HNBn<sub>2</sub>

|   |             |             |             |
|---|-------------|-------------|-------------|
| N | -0.09823200 | 2.55428300  | 0.36715100  |
| C | -1.13836500 | 2.08523200  | -0.55922500 |
| H | -1.98635800 | 2.77738600  | -0.46202100 |
| H | -0.74918900 | 2.21195600  | -1.57634100 |
| C | 1.28935800  | 2.19660700  | 0.07127500  |
| H | 1.91032300  | 2.77206900  | 0.77221700  |
| H | 1.51947200  | 2.58756200  | -0.92810000 |
| C | -1.65779800 | 0.66478200  | -0.37659600 |
| C | -2.50768400 | 0.36830800  | 0.69923900  |
| C | -1.32259600 | -0.36642400 | -1.26189500 |
| C | -2.99333100 | -0.92435900 | 0.89736200  |
| H | -2.80044500 | 1.16234900  | 1.38489400  |
| C | -1.80837700 | -1.66147400 | -1.07164600 |
| H | -0.66771200 | -0.15589400 | -2.10369500 |
| C | -2.64317400 | -1.94526400 | 0.01041900  |
| H | -3.65246700 | -1.13303900 | 1.73635500  |
| H | -1.53357400 | -2.44870000 | -1.76896400 |
| H | -3.02302000 | -2.95265300 | 0.15908700  |
| C | 1.71488200  | 0.73168200  | 0.13499500  |
| C | 2.33676200  | 0.12112500  | -0.96007400 |
| C | 1.53540900  | -0.02217500 | 1.30306300  |
| C | 2.76168800  | -1.20866100 | -0.89859700 |
| H | 2.49259400  | 0.69436800  | -1.87224700 |
| C | 1.95255300  | -1.35042200 | 1.37019600  |
| C | 2.56803000  | -1.94950800 | 0.26729700  |
| H | 3.24147700  | -1.66392100 | -1.76145300 |
| H | 2.89465900  | -2.98474600 | 0.31934500  |
| H | -0.33998200 | 2.30399700  | 1.32318700  |
| H | 1.05744500  | 0.43202200  | 2.16901800  |
| H | 1.80027700  | -1.91943600 | 2.28378600  |

#### TS7

|   |            |            |            |
|---|------------|------------|------------|
| C | 3.52443700 | 1.53067700 | 0.77612300 |
|---|------------|------------|------------|

|   |             |             |             |   |             |             |             |
|---|-------------|-------------|-------------|---|-------------|-------------|-------------|
| H | 3.91421400  | 2.31035000  | 1.45669500  | C | 1.81048900  | 2.00202300  | 3.54643000  |
| H | 4.37230600  | 0.91922900  | 0.47286800  | C | 2.31941100  | 3.31037500  | 3.56336400  |
| N | 2.95248900  | 2.12248600  | -0.43874200 | C | 2.57430900  | 3.96554300  | 4.76963700  |
| C | 2.40870700  | 3.48616600  | -0.22660600 | C | 2.31902000  | 3.32793200  | 5.98466300  |
| H | 1.82172300  | 3.47589800  | 0.69344500  | C | 1.80073400  | 2.03201200  | 5.98575900  |
| H | 3.22579300  | 4.21233600  | -0.06626000 | C | 1.54972300  | 1.38089800  | 4.77770800  |
| C | 3.97196600  | 2.17967800  | -1.52586500 | H | 2.58000700  | -1.26115500 | -0.10266700 |
| H | 4.92816500  | 2.56242800  | -1.12948800 | H | 1.63469700  | 0.17416800  | -0.75464100 |
| H | 3.61428400  | 2.92215200  | -2.24284500 | H | 3.91988800  | 0.46310900  | 3.22490500  |
| C | 1.51988400  | 3.96923900  | -1.35617400 | H | 2.70151400  | -0.79330700 | 3.07379900  |
| C | 0.32749500  | 3.29643400  | -1.66251500 | H | 3.12109200  | -2.81972300 | 1.73833800  |
| C | 1.84682100  | 5.11990300  | -2.08280800 | H | 4.83593900  | -4.38328900 | 0.88978400  |
| C | -0.51844200 | 3.76715200  | -2.66591700 | H | 7.19670500  | -3.63579600 | 0.64353400  |
| H | 0.05778800  | 2.40541800  | -1.09996500 | H | 7.82463000  | -1.31461600 | 1.28162600  |
| C | 1.00467500  | 5.59201100  | -3.09334300 | H | 6.10644900  | 0.24814600  | 2.12621900  |
| H | 2.76502900  | 5.65581500  | -1.85272800 | H | 0.98567300  | 1.88940300  | 1.53875600  |
| C | -0.18032900 | 4.91743600  | -3.38558700 | H | 0.81002400  | 0.43813800  | 2.49945100  |
| H | -1.45184800 | 3.25141800  | -2.87604500 | H | 2.50779200  | 3.83829300  | 2.63431800  |
| H | 1.27452900  | 6.48723300  | -3.64638900 | H | 2.96438800  | 4.97941100  | 4.75798800  |
| H | -0.84090400 | 5.28695400  | -4.16481000 | H | 2.51388200  | 3.84023500  | 6.92234200  |
| C | 4.20674200  | 0.88165500  | -2.27104900 | H | 1.58669100  | 1.52977400  | 6.92495900  |
| C | 3.39863800  | 0.55565800  | -3.37110600 | H | 1.13571900  | 0.37472400  | 4.79131000  |
| C | 5.25931100  | 0.01948800  | -1.93727000 | N | -4.09002700 | 0.29978700  | 0.17712500  |
| C | 3.63649400  | -0.60006000 | -4.11419000 | C | -5.09445400 | 0.90708500  | -0.71312200 |
| H | 2.59342900  | 1.22945300  | -3.65595700 | H | -5.04969500 | 0.46631500  | -1.72787400 |
| C | 5.48811600  | -1.15043600 | -2.66681400 | C | -4.39692200 | -1.11168900 | 0.46665800  |
| C | 4.67888200  | -1.46133200 | -3.76018500 | H | -3.53964600 | -1.51436100 | 1.02142400  |
| H | 3.02442000  | -0.81979000 | -4.98534200 | H | -4.47453900 | -1.70745300 | -0.46210200 |
| H | 4.87167900  | -2.35583200 | -4.34626400 | H | -6.07500700 | 0.64211500  | -0.30339100 |
| H | 5.92422000  | 0.26957300  | -1.11459400 | C | -5.65187200 | -1.29090300 | 1.29753500  |
| H | 6.31093800  | -1.80377100 | -2.39076500 | C | -5.78627900 | -0.63909000 | 2.53220400  |
| C | 0.31690500  | -5.51550700 | 1.29858800  | C | -6.68268700 | -2.13266200 | 0.86490100  |
| C | 0.96478000  | -5.06172500 | 0.15112800  | C | -6.92408200 | -0.82810800 | 3.31521300  |
| C | 1.01572000  | -3.69730600 | -0.16127500 | H | -4.99494100 | 0.02500100  | 2.87010600  |
| C | 0.40072800  | -2.77147400 | 0.70778800  | C | -7.82275100 | -2.32777800 | 1.64924500  |
| C | -0.26320600 | -3.24053000 | 1.85257000  | H | -6.59422600 | -2.63601600 | -0.09554400 |
| C | -0.30598100 | -4.59978700 | 2.15062100  | C | -7.94571400 | -1.67580700 | 2.87631900  |
| H | 0.29049000  | -6.57786800 | 1.52192400  | H | -7.01562100 | -0.31567700 | 4.26919600  |
| H | 1.42971700  | -5.77898000 | -0.52214700 | H | -8.61507800 | -2.98298400 | 1.29766900  |
| H | -0.74106700 | -2.52230500 | 2.51304600  | H | -8.83225000 | -1.82306700 | 3.48675000  |
| H | -0.81796800 | -4.94271600 | 3.04468400  | C | -4.97507000 | 2.41487200  | -0.80899600 |
| C | 0.42652800  | -1.30965800 | 0.38819800  | C | -4.92343100 | 3.05155000  | -2.05494900 |
| C | -0.63427300 | -0.52533800 | 0.55755400  | C | -4.94916200 | 3.20186900  | 0.35190300  |
| C | -1.68558400 | 0.23162300  | 0.71035200  | C | -4.85535400 | 4.44476900  | -2.14437500 |
| H | -1.83697300 | 0.77110000  | 1.64711300  | H | -4.95109100 | 2.45277300  | -2.96324700 |
| C | -2.74297800 | 0.46599000  | -0.35393400 | C | -4.87603100 | 4.59164200  | 0.26567400  |
| H | -2.64568300 | 1.50616200  | -0.68729800 | H | -4.98769700 | 2.71381500  | 1.32178400  |
| H | -2.53930400 | -0.17832200 | -1.23063400 | C | -4.82982100 | 5.21797200  | -0.98337500 |
| C | 1.73818600  | -3.28315300 | -1.43523500 | H | -4.82547200 | 4.92325200  | -3.11966500 |
| H | 2.82471800  | -3.31659000 | -1.30244600 | H | -4.86232500 | 5.18909900  | 1.17340800  |
| H | 1.48428500  | -3.96374100 | -2.25532600 | H | -4.77776300 | 6.30114600  | -1.04925300 |
| O | 1.44577500  | -1.94532500 | -1.86930500 | O | -0.74580700 | -2.17639500 | -3.42126200 |
| H | 0.52779200  | -1.93577400 | -2.25489800 | C | -2.12227500 | -2.54722200 | -3.31695300 |
| N | 2.63795700  | 0.60573000  | 1.53196100  | H | -2.74083900 | -1.66307300 | -3.10794700 |
| C | 1.62407500  | -0.78402200 | -0.25044100 | H | -2.45994600 | -2.98187000 | -4.26680200 |
| C | 3.43278100  | -0.20997300 | 2.50550600  | C | -0.46958400 | -1.38400900 | -4.57525300 |
| C | 4.47496100  | -1.15087300 | 1.93311800  | H | 0.59694600  | -1.15205400 | -4.55244400 |
| C | 4.14179100  | -2.47212500 | 1.59874900  | H | -0.70483100 | -1.94096400 | -5.49100800 |
| C | 5.11192000  | -3.35958500 | 1.12827200  | H | -1.04894500 | -0.45088500 | -4.56259000 |
| C | 6.43838500  | -2.94268600 | 0.99642000  | C | -2.27521500 | -3.56847100 | -2.19852600 |
| C | 6.79012700  | -1.63882000 | 1.35183800  | H | -1.73018700 | -4.49101900 | -2.45748600 |
| C | 5.81646300  | -0.75503800 | 1.82156500  | H | -1.84276200 | -3.17937900 | -1.26186800 |
| C | 1.50333000  | 1.24952400  | 2.25546000  | O | -3.65561600 | -3.81279400 | -2.05729000 |

|   |             |             |             |
|---|-------------|-------------|-------------|
| C | -3.93963100 | -4.87247100 | -1.15969200 |
| H | -5.02637800 | -4.96909600 | -1.11377600 |
| H | -3.50793600 | -5.82120000 | -1.51260400 |
| H | -3.55279700 | -4.66288400 | -0.15091600 |

**4**

|   |             |             |             |
|---|-------------|-------------|-------------|
| C | 5.70703500  | 2.02217700  | 0.10585700  |
| C | 6.13125300  | 0.70576500  | 0.27378500  |
| C | 5.24660300  | -0.36224800 | 0.09262300  |
| C | 3.90946600  | -0.10589200 | -0.26641100 |
| C | 3.49079300  | 1.22533100  | -0.42916700 |
| C | 4.37790800  | 2.28034800  | -0.24622600 |
| H | 6.40432300  | 2.84220600  | 0.25425300  |
| H | 7.16187900  | 0.50120400  | 0.55785000  |
| H | 2.46078000  | 1.42089000  | -0.71443700 |
| H | 4.03645400  | 3.30328500  | -0.37980000 |
| C | 2.99342700  | -1.25496200 | -0.46400900 |
| C | 1.69124600  | -1.15195100 | -0.62254900 |
| C | 0.39210600  | -1.09027700 | -0.77542400 |
| H | -0.03334600 | -0.99035300 | -1.77665900 |
| C | -0.62098400 | -1.18754600 | 0.34697100  |
| H | -1.18110400 | -2.12191000 | 0.22173400  |
| H | -0.10085900 | -1.24840900 | 1.32026400  |
| C | 5.72676900  | -1.79059100 | 0.26582600  |
| H | 6.29568900  | -2.10436400 | -0.62946000 |
| H | 6.40139900  | -1.86820600 | 1.12465200  |
| O | 4.67418700  | -2.70663700 | 0.50885500  |
| C | 3.67164900  | -2.62016900 | -0.49034200 |
| H | 4.11795000  | -2.79531400 | -1.48586700 |
| H | 2.95402400  | -3.41836200 | -0.29081400 |
| N | -1.59835000 | -0.09302900 | 0.30473600  |
| C | -2.79744700 | -0.40399900 | 1.09318100  |
| H | -2.54003500 | -0.66272800 | 2.13901000  |
| C | -1.00355200 | 1.18601500  | 0.70920900  |
| H | -0.02396100 | 1.24887000  | 0.22059800  |
| H | -0.80798400 | 1.21794800  | 1.79884600  |
| H | -3.39258700 | 0.51580000  | 1.14045200  |
| C | -1.83592600 | 2.38941900  | 0.30900300  |
| C | -2.28148300 | 2.53721200  | -1.01278200 |
| C | -2.14103200 | 3.39286500  | 1.23544600  |
| C | -3.01115900 | 3.66164200  | -1.39625500 |
| H | -2.05457200 | 1.75718600  | -1.73416800 |
| C | -2.86886800 | 4.52323600  | 0.85405600  |
| H | -1.80528600 | 3.28861800  | 2.26509800  |
| C | -3.30638800 | 4.66037600  | -0.46344500 |
| H | -3.34924200 | 3.76139200  | -2.42464800 |
| H | -3.09723100 | 5.29164000  | 1.58816200  |
| H | -3.87519700 | 5.53678900  | -0.76265000 |
| C | -3.64390600 | -1.51041800 | 0.49298100  |
| C | -4.10541200 | -2.56941700 | 1.28308600  |
| C | -4.01367800 | -1.46976800 | -0.85937100 |
| C | -4.92514000 | -3.56329800 | 0.74189900  |
| H | -3.82128500 | -2.61600500 | 2.33234100  |
| C | -4.82817900 | -2.46188100 | -1.40368400 |
| H | -3.64995800 | -0.65536100 | -1.47914900 |
| C | -5.28860600 | -3.51218900 | -0.60399000 |
| H | -5.27338100 | -4.37825400 | 1.37126300  |
| H | -5.10681300 | -2.41588000 | -2.45352500 |
| H | -5.92366900 | -4.28506100 | -1.02894700 |

**TS8**

|   |            |            |             |
|---|------------|------------|-------------|
| C | 5.76758700 | 2.17452400 | -2.01031000 |
| C | 6.71207400 | 3.19530200 | -2.19119700 |

|   |             |             |             |
|---|-------------|-------------|-------------|
| C | 6.26536200  | 4.41483100  | -2.70861600 |
| C | 4.92837000  | 4.59767100  | -3.05986100 |
| C | 4.01593800  | 3.55770700  | -2.89912100 |
| C | 4.41070300  | 2.32134300  | -2.36338600 |
| H | 6.96493700  | 5.23064500  | -2.85249000 |
| H | 4.59959900  | 5.54925800  | -3.46713500 |
| H | 2.97879200  | 3.71241400  | -3.17734700 |
| C | 8.17938100  | 2.87384100  | -1.88491300 |
| C | 9.01859000  | 4.14591400  | -1.67532300 |
| H | 10.06643600 | 3.89268500  | -1.49011400 |
| H | 8.65307100  | 4.74484700  | -0.83423500 |
| H | 9.00775100  | 4.76893400  | -2.57432200 |
| C | 8.76892600  | 2.08765600  | -3.09294200 |
| H | 9.81138400  | 1.81494000  | -2.89383000 |
| H | 8.73747400  | 2.70480100  | -3.99784200 |
| H | 8.20603700  | 1.16942500  | -3.28578500 |
| C | 8.20349300  | 1.95773600  | -0.65571500 |
| C | 9.20957200  | 1.97548900  | 0.31443900  |
| C | 7.18899600  | 0.99600400  | -0.53294800 |
| C | 9.21622100  | 1.05005700  | 1.35744200  |
| H | 10.00536300 | 2.70959700  | 0.25549700  |
| C | 7.16002000  | 0.04969300  | 0.51211700  |
| C | 8.20615400  | 0.09613700  | 1.44894900  |
| H | 10.01070000 | 1.07149000  | 2.09754400  |
| H | 8.21751000  | -0.61419100 | 2.26880800  |
| O | 6.18039400  | 0.96638200  | -1.47900600 |
| P | 3.21404400  | 0.91762400  | -2.14818700 |
| P | 5.79140500  | -1.19742100 | 0.67318000  |
| C | 3.32722600  | 0.03957400  | -3.77158100 |
| C | 3.38700700  | 0.72111700  | -4.99853000 |
| C | 3.37818500  | -1.36239600 | -3.77207300 |
| C | 3.48065800  | 0.01331700  | -6.19685400 |
| H | 3.36988600  | 1.80688700  | -5.01999500 |
| C | 3.47300400  | -2.07045300 | -4.97244100 |
| H | 3.36784800  | -1.89047700 | -2.82165900 |
| C | 3.52202000  | -1.38377100 | -6.18606800 |
| H | 3.52763800  | 0.55244300  | -7.13906500 |
| H | 3.52130600  | -3.15594800 | -4.95763500 |
| H | 3.60140200  | -1.93235900 | -7.12053800 |
| C | 1.56948900  | 1.77277200  | -2.20934400 |
| C | 1.24963800  | 2.68073800  | -1.18108700 |
| C | 0.58643700  | 1.47189900  | -3.16475000 |
| C | -0.00654300 | 3.28528400  | -1.12576700 |
| H | 1.99331800  | 2.92908700  | -0.42818500 |
| C | -0.67697300 | 2.06950300  | -3.10083200 |
| H | 0.80628900  | 0.77799200  | -3.96962500 |
| C | -0.97648200 | 2.98049500  | -2.08728300 |
| H | -0.22463800 | 4.00076600  | -0.33685200 |
| H | -1.42182700 | 1.82623800  | -3.85375900 |
| H | -1.95274900 | 3.45595400  | -2.04763200 |
| C | 6.45963600  | -2.69799000 | -0.17496300 |
| C | 7.83007800  | -2.92136100 | -0.37724500 |
| C | 5.54369000  | -3.66253700 | -0.62659000 |
| C | 8.27159600  | -4.08373000 | -1.01304900 |
| H | 8.55614200  | -2.18697100 | -0.04297600 |
| C | 5.98633100  | -4.82950000 | -1.25027200 |
| H | 4.47880900  | -3.48591700 | -0.49357600 |
| C | 7.35277100  | -5.04089100 | -1.44755000 |
| H | 9.33561300  | -4.24049600 | -1.16769100 |
| H | 5.26570900  | -5.56841700 | -1.59078300 |
| H | 7.69937700  | -5.94428500 | -1.94163000 |
| C | 5.88073100  | -1.63807700 | 2.47156800  |
| C | 6.25946200  | -2.90681100 | 2.93272700  |

|    |             |             |             |   |              |             |             |
|----|-------------|-------------|-------------|---|--------------|-------------|-------------|
| C  | 5.48554600  | -0.66877500 | 3.41216000  | H | -8.72075000  | -0.92213800 | -0.48448700 |
| C  | 6.24285500  | -3.19964000 | 4.30047800  | N | -5.64240700  | 2.74363300  | 0.95545500  |
| H  | 6.57500400  | -3.66965200 | 2.22828400  | C | -5.72926400  | 1.29000200  | 0.83654500  |
| C  | 5.48451400  | -0.95798300 | 4.77595000  | C | -6.21647500  | 3.50858200  | -0.15535700 |
| H  | 5.18606700  | 0.32097000  | 3.07532300  | C | -7.72347300  | 3.38643100  | -0.28793200 |
| C  | 5.85924200  | -2.22861900 | 5.22479400  | C | -8.31563700  | 3.35736700  | -1.55622600 |
| H  | 6.54076100  | -4.18807300 | 4.63991600  | C | -9.70538000  | 3.35722200  | -1.69628700 |
| H  | 5.19099200  | -0.19222500 | 5.48935000  | C | -10.52283300 | 3.36669600  | -0.56434800 |
| H  | 5.85365600  | -2.45624500 | 6.28704600  | C | -9.94023400  | 3.37615200  | 0.70586200  |
| Pd | 3.88995200  | -0.36118500 | -0.34939900 | C | -8.55208900  | 3.39141400  | 0.84219800  |
| C  | 0.94443400  | -0.71185000 | 1.00184300  | C | -4.32424500  | 3.23274500  | 1.36001200  |
| H  | 1.62462200  | -1.51022400 | 0.72487300  | C | -4.36610500  | 4.60442900  | 2.01055300  |
| N  | 0.93659000  | -0.31310900 | 2.26615900  | C | -5.21940800  | 4.84898400  | 3.09633700  |
| C  | 0.38764000  | 1.01072900  | 2.62485400  | C | -5.23255500  | 6.09383900  | 3.72374300  |
| H  | -0.32066200 | 0.88075100  | 3.44817500  | C | -4.39019000  | 7.11614200  | 3.27586900  |
| C  | 1.68483400  | -1.05289800 | 3.32515500  | C | -3.53846100  | 6.88466200  | 2.19568700  |
| H  | 2.11619900  | -1.93521900 | 2.84856000  | C | -3.53051300  | 5.63583500  | 1.56833600  |
| H  | 2.51895400  | -0.40987800 | 3.62170100  | H | -6.76601800  | 1.01117700  | 0.63508000  |
| H  | 0.71904000  | 0.02576800  | 0.24287500  | H | -5.45676400  | 0.86380400  | 1.80817900  |
| H  | -0.18638900 | 1.36120000  | 1.76251500  | H | -5.97397600  | 4.56067100  | 0.03955900  |
| C  | 0.87487300  | -1.44486400 | 4.54618900  | H | -5.74290400  | 3.26038200  | -1.12124500 |
| C  | 0.40503700  | -2.75604000 | 4.70386000  | H | -7.68372700  | 3.34370600  | -2.44161300 |
| C  | 0.63686600  | -0.52007200 | 5.57472400  | H | -10.14789400 | 3.35230200  | -2.68932100 |
| C  | -0.31713900 | -3.12682100 | 5.83994500  | H | -11.60462700 | 3.37187600  | -0.66976000 |
| H  | 0.62804600  | -3.50638400 | 3.94969600  | H | -10.56922000 | 3.38164900  | 1.59227300  |
| C  | -0.09069400 | -0.88569700 | 6.70824500  | H | -8.09724700  | 3.40717500  | 1.82796800  |
| H  | 1.04016000  | 0.48641500  | 5.49835700  | H | -3.92363400  | 2.50623600  | 2.07947100  |
| C  | -0.57532500 | -2.18853100 | 6.84071500  | H | -3.60629700  | 3.25426800  | 0.51795300  |
| H  | -0.66465600 | -4.15043600 | 5.94681200  | H | -5.87850900  | 4.05578700  | 3.43849100  |
| H  | -0.26573700 | -0.15671800 | 7.49441400  | H | -5.90063300  | 6.26904200  | 4.56287800  |
| H  | -1.13466700 | -2.47526500 | 7.72654700  | H | -4.40283200  | 8.08694100  | 3.76370200  |
| C  | 1.44348800  | 2.03817900  | 3.00356100  | H | -2.88631800  | 7.67583300  | 1.83521500  |
| C  | 2.67110200  | 2.11827600  | 2.33060000  | H | -2.87029100  | 5.46244800  | 0.72034700  |
| C  | 1.15572300  | 2.97118300  | 4.00795800  | N | -0.71273000  | -1.88528900 | 0.36181600  |
| C  | 3.59026100  | 3.11692100  | 2.66059500  | C | -0.42316700  | -3.21818500 | 0.98618900  |
| H  | 2.92642300  | 1.39853400  | 1.55077900  | H | 0.37720200   | -3.66952600 | 0.39152000  |
| C  | 2.07264800  | 3.97373000  | 4.33190500  | C | -0.53446300  | -1.81969400 | -1.11852400 |
| H  | 0.20509700  | 2.92123300  | 4.53477800  | H | 0.53731800   | -1.96902200 | -1.29674900 |
| C  | 3.29339400  | 4.04773000  | 3.65952300  | H | -0.76142200  | -0.79025100 | -1.40869700 |
| H  | 4.53801600  | 3.16612500  | 2.13094200  | H | -0.01294100  | -2.99019200 | 1.97376700  |
| H  | 1.83309100  | 4.69141500  | 5.11130700  | C | -1.30825700  | -2.77679000 | -2.00492600 |
| H  | 4.00970800  | 4.82399200  | 3.91285600  | C | -0.61623900  | -3.76390500 | -2.72055100 |
| C  | -6.43200300 | -0.25535600 | -4.16109500 | C | -2.69262900  | -2.65499300 | -2.19346900 |
| C  | -6.86942900 | -0.97262500 | -3.04647900 | C | -1.29108600  | -4.62864500 | -3.58508300 |
| C  | -6.36925900 | -0.71375200 | -1.76273700 | H | 0.46292300   | -3.85049700 | -2.60903100 |
| C  | -5.40333800 | 0.30605600  | -1.60368500 | C | -3.36962400  | -3.52031100 | -3.05243600 |
| C  | -4.95106500 | 1.00422700  | -2.73324000 | H | -3.24348800  | -1.86904200 | -1.68671700 |
| C  | -5.46128300 | 0.73400600  | -4.00318600 | C | -2.67269200  | -4.51287600 | -3.74628900 |
| H  | -6.83738900 | -0.47537100 | -5.14485600 | H | -0.73769700  | -5.38489300 | -4.13503700 |
| H  | -7.61806600 | -1.75295300 | -3.16492000 | H | -4.44093400  | -3.40494900 | -3.19023200 |
| H  | -4.19162500 | 1.77072200  | -2.60474900 | H | -3.20120200  | -5.18173400 | -4.41977900 |
| H  | -5.09968300 | 1.29128300  | -4.86314100 | C | -1.55695800  | -4.21507600 | 1.18448300  |
| C  | -4.83459900 | 0.63002200  | -0.25020000 | C | -1.81281500  | -5.23779900 | 0.26123800  |
| C  | -3.57526700 | 0.35761000  | -0.00064500 | C | -2.32176200  | -4.17081000 | 2.36157000  |
| C  | -2.33018200 | 0.05603500  | 0.29178900  | C | -2.81892700  | -6.17566100 | 0.49680400  |
| H  | -1.55321800 | 0.80073500  | 0.11646400  | H | -1.22572500  | -5.30400200 | -0.64831000 |
| C  | -1.94196500 | -1.26451200 | 0.91891100  | C | -3.33354300  | -5.10259300 | 2.59581200  |
| H  | -1.73809800 | -1.13337000 | 1.99224900  | H | -2.11482600  | -3.41004700 | 3.11051700  |
| H  | -2.78335100 | -1.95980600 | 0.84306800  | C | -3.58638700  | -6.10786900 | 1.66079500  |
| C  | -6.87508800 | -1.54438100 | -0.59451700 | H | -2.99950400  | -6.96195200 | -0.23067800 |
| H  | -7.16851300 | -2.53703900 | -0.96828000 | H | -3.91512400  | -5.04899500 | 3.51195000  |
| H  | -6.07484600 | -1.69573100 | 0.13684300  | H | -4.36878700  | -6.83916000 | 1.84317700  |
| O  | -7.94546500 | -0.93724800 | 0.11621000  | O | -10.12880000 | -1.34682200 | -1.62153800 |



|   |              |             |             |
|---|--------------|-------------|-------------|
| C | -11.17140700 | -2.06545700 | -0.96785100 |
| H | -11.73623400 | -1.40199100 | -0.29671500 |
| H | -11.87189100 | -2.47425500 | -1.71035600 |
| C | -10.61353600 | -0.27255700 | -2.41710200 |
| H | -9.74275100  | 0.21405900  | -2.86071500 |
| H | -11.27361700 | -0.64559000 | -3.21306800 |
| H | -11.16089100 | 0.45896800  | -1.80750800 |
| C | -10.54253500 | -3.19789800 | -0.16743400 |
| H | -9.98680200  | -3.86843600 | -0.84544000 |
| H | -9.82398300  | -2.78742600 | 0.55971900  |
| O | -11.59676400 | -3.88112600 | 0.47361300  |
| C | -11.15064000 | -4.95699800 | 1.27104900  |
| H | -12.03597200 | -5.41138300 | 1.72266600  |
| H | -10.62471000 | -5.71734100 | 0.67109700  |
| H | -10.47385700 | -4.61661900 | 2.07104900  |

## INT6

|   |             |             |             |
|---|-------------|-------------|-------------|
| C | 4.08370300  | -0.65142500 | -1.49359200 |
| H | 4.73223300  | -1.28387800 | -2.10348600 |
| N | 4.77657300  | -0.05605900 | -0.43359100 |
| C | 4.43848300  | 1.32838800  | -0.05846600 |
| H | 4.60715800  | 1.43331700  | 1.01786300  |
| C | 6.20460000  | -0.43031500 | -0.22251800 |
| H | 6.35413600  | -1.41790400 | -0.66919200 |
| H | 6.84261300  | 0.27330900  | -0.77278900 |
| H | 3.56077800  | 0.05802600  | -2.13695400 |
| H | 3.36272100  | 1.46926400  | -0.20472600 |
| C | 6.63345100  | -0.46082100 | 1.23238100  |
| C | 6.54432600  | -1.63828700 | 1.98883200  |
| C | 7.16287500  | 0.68657000  | 1.84006400  |
| C | 6.94780300  | -1.66428000 | 3.32462600  |
| H | 6.18335800  | -2.55486600 | 1.52757400  |
| C | 7.56455700  | 0.66545200  | 3.17718000  |
| H | 7.27189900  | 1.59946300  | 1.25968300  |
| C | 7.45375200  | -0.50866900 | 3.92377100  |
| H | 6.88118700  | -2.58879600 | 3.89116400  |
| H | 7.97499600  | 1.56303700  | 3.63098500  |
| H | 7.77380500  | -0.52796900 | 4.96153200  |
| C | 5.19700700  | 2.43469400  | -0.78762400 |
| C | 5.58401800  | 2.33441500  | -2.13026000 |
| C | 5.47350700  | 3.62548300  | -0.10073200 |
| C | 6.22430900  | 3.39698500  | -2.77170500 |
| H | 5.40092400  | 1.41935300  | -2.68829300 |
| C | 6.10588800  | 4.69299100  | -0.74078000 |
| H | 5.18750400  | 3.71827200  | 0.94474800  |
| C | 6.48378600  | 4.58124200  | -2.08016000 |
| H | 6.52128200  | 3.29766500  | -3.81201100 |
| H | 6.31092500  | 5.60690300  | -0.19050800 |
| H | 6.98211400  | 5.40729400  | -2.57879100 |
| C | -4.24436000 | -1.28293100 | -3.62983400 |
| C | -4.26665700 | -1.75379200 | -2.31603100 |
| C | -3.39578200 | -1.25360300 | -1.33813600 |
| C | -2.47751900 | -0.24135500 | -1.70340100 |
| C | -2.44860800 | 0.21139700  | -3.03209800 |
| C | -3.32490400 | -0.29807600 | -3.99016300 |
| H | -4.93300500 | -1.68823700 | -4.36578100 |
| H | -4.97724500 | -2.52777700 | -2.03409000 |
| H | -1.73521800 | 0.98313100  | -3.30739900 |
| H | -3.28772000 | 0.07348100  | -5.01031600 |
| C | -1.51330600 | 0.35279600  | -0.71784300 |
| C | -0.22073600 | 0.23578200  | -0.90368300 |
| C | 1.08818500  | 0.13297200  | -0.99489500 |
| H | 1.64462000  | 0.91396400  | -1.51256800 |

|   |             |             |             |
|---|-------------|-------------|-------------|
| C | 1.84508700  | -0.94453400 | -0.25905400 |
| H | 2.39509900  | -0.54304700 | 0.59689500  |
| H | 1.15242100  | -1.69554900 | 0.11693900  |
| C | -3.48014000 | -1.82001300 | 0.06985600  |
| H | -3.84012700 | -2.85859800 | 0.01291700  |
| H | -2.48752300 | -1.84665100 | 0.53103400  |
| O | -4.29771300 | -1.05494800 | 0.94569500  |
| H | -5.22334800 | -1.09661600 | 0.61620700  |
| N | -2.66686100 | 2.43269200  | 0.22050600  |
| C | -2.00868100 | 1.16897600  | 0.50971700  |
| C | -4.04924100 | 2.33978100  | -0.26758600 |
| C | -4.89297200 | 3.54133700  | 0.12262700  |
| C | -4.96920000 | 3.95370200  | 1.46099600  |
| C | -5.77589400 | 5.02958600  | 1.82852800  |
| C | -6.52181100 | 5.71135700  | 0.86192700  |
| C | -6.45262800 | 5.31069600  | -0.47235500 |
| C | -5.64035900 | 4.23326500  | -0.83709700 |
| C | -1.86530900 | 3.42303300  | -0.49521900 |
| C | -0.60863600 | 3.85269600  | 0.23977100  |
| C | -0.63449400 | 4.12614800  | 1.61457100  |
| C | 0.51065200  | 4.57680500  | 2.27175000  |
| C | 1.69975400  | 4.76884300  | 1.56288200  |
| C | 1.73681400  | 4.50268900  | 0.19281300  |
| C | 0.59002200  | 4.04068900  | -0.45877900 |
| H | -2.71024500 | 0.55065500  | 1.07494900  |
| H | -1.13744300 | 1.36946800  | 1.13976700  |
| H | -4.09737600 | 2.20970400  | -1.36243700 |
| H | -4.47609100 | 1.43163400  | 0.17166700  |
| H | -4.38755300 | 3.42412700  | 2.21080400  |
| H | -5.82649400 | 5.33675700  | 2.86986900  |
| H | -7.15011500 | 6.55011900  | 1.14877300  |
| H | -7.02424900 | 5.83842200  | -1.23116800 |
| H | -5.58598500 | 3.92694500  | -1.87997800 |
| H | -1.59007800 | 3.08144800  | -1.51082800 |
| H | -2.50945500 | 4.30027400  | -0.63361300 |
| H | -1.56206900 | 3.98312600  | 2.16133000  |
| H | 0.47247900  | 4.78895400  | 3.33706900  |
| H | 2.58670600  | 5.13387400  | 2.07443100  |
| H | 2.65383600  | 4.65986600  | -0.36910200 |
| H | 0.61945200  | 3.84351800  | -1.52897700 |
| N | 2.89696800  | -1.68151000 | -1.07911700 |
| C | 3.54346400  | -2.81627500 | -0.24608600 |
| H | 3.81471400  | -3.58998900 | -0.96613000 |
| C | 2.34409900  | -2.17557500 | -2.42378700 |
| H | 3.22644600  | -2.38828900 | -3.03318000 |
| H | 1.83201900  | -1.31276900 | -2.85454900 |
| H | 4.45209400  | -2.36917200 | 0.15011200  |
| C | 1.44067000  | -3.38222300 | -2.42055700 |
| C | 1.95183900  | -4.62851800 | -2.81459800 |
| C | 0.07370400  | -3.27213000 | -2.12602900 |
| C | 1.12390100  | -5.75023800 | -2.87996100 |
| H | 3.00045400  | -4.72172000 | -3.08967300 |
| C | -0.75378000 | -4.39300100 | -2.18986800 |
| H | -0.35302700 | -2.30735200 | -1.87100600 |
| C | -0.23053800 | -5.63455000 | -2.55950500 |
| H | 1.53295700  | -6.70664800 | -3.19199300 |
| H | -1.81181900 | -4.28815100 | -1.96912200 |
| H | -0.87877900 | -6.50415300 | -2.61668800 |
| C | 2.76432000  | -3.39098600 | 0.91710000  |
| C | 1.94604000  | -4.52178100 | 0.78086600  |
| C | 2.93063500  | -2.82487000 | 2.19241400  |
| C | 1.29436500  | -5.05912700 | 1.89200900  |
| H | 1.82431600  | -4.99250400 | -0.18828200 |

|   |             |             |             |   |             |             |             |
|---|-------------|-------------|-------------|---|-------------|-------------|-------------|
| C | 2.27419900  | -3.35913100 | 3.30040800  | H | -3.63505300 | -1.54165100 | -2.33915700 |
| H | 3.59286900  | -1.97237600 | 2.32215200  | H | -5.23731000 | 0.72049500  | -2.56400500 |
| C | 1.45053800  | -4.47694500 | 3.15117000  | H | -5.61177200 | -0.93406100 | -2.09118300 |
| H | 0.66874800  | -5.93883100 | 1.77227400  | H | -5.96345100 | -0.38104900 | 0.98119500  |
| H | 2.41507900  | -2.91002100 | 4.27917700  | H | -7.98110800 | 0.33840100  | 2.21672600  |
| H | 0.94283200  | -4.89877700 | 4.01373600  | H | -9.72714600 | 1.69654400  | 1.07889500  |
| O | -6.95947900 | -1.29139500 | 0.10937500  | H | -9.42842300 | 2.32963000  | -1.30981700 |
| C | -7.80927200 | -1.60664200 | 1.21173600  | H | -7.40671700 | 1.61176100  | -2.54030700 |
| H | -7.92069000 | -0.73672900 | 1.87494000  | H | -4.32939400 | 1.48048900  | 0.41704600  |
| H | -8.80725100 | -1.88864100 | 0.84802500  | H | -2.69005500 | 0.90739900  | 0.20398000  |
| C | -7.46719500 | -0.23260600 | -0.69451700 | H | -1.38837500 | 1.69405400  | -1.93162000 |
| H | -6.75679900 | -0.08238100 | -1.51030800 | H | -1.04761900 | 3.57777400  | -3.48361300 |
| H | -8.44844100 | -0.49839100 | -1.11090600 | H | -2.79882300 | 5.32608500  | -3.73545500 |
| H | -7.56476300 | 0.69767500  | -0.11733900 | H | -4.89918900 | 5.16104100  | -2.41120300 |
| C | -7.18705000 | -2.76743100 | 1.97618200  | H | -5.24970600 | 3.26015400  | -0.87062000 |
| H | -7.08510900 | -3.64010100 | 1.30838600  | C | 2.95021900  | 0.33126400  | 1.01859800  |
| H | -6.17734100 | -2.49009400 | 2.32119500  | H | 3.67390000  | 0.26823900  | 1.84276100  |
| O | -8.04295300 | -3.04955800 | 3.05935700  | N | 1.57278100  | 0.41607800  | 1.59938800  |
| C | -7.58190700 | -4.11512900 | 3.86349800  | C | 1.43030800  | 1.65321800  | 2.42546100  |
| H | -8.30943400 | -4.24845800 | 4.66767000  | H | 2.06913100  | 1.55151300  | 3.31600800  |
| H | -7.50549000 | -5.05291300 | 3.29014700  | C | 1.17728500  | -0.84385100 | 2.28247700  |
| H | -6.59634200 | -3.89442300 | 4.30360200  | H | 1.13357400  | -1.60879200 | 1.50000600  |

## TS9

|   |             |             |             |   |            |             |             |
|---|-------------|-------------|-------------|---|------------|-------------|-------------|
| C | -4.26984700 | -5.27582800 | 0.94682100  | H | 2.98648400 | -0.62123100 | 0.48393900  |
| C | -2.93059500 | -5.36278300 | 0.56551500  | N | 3.28210100 | 1.42852400  | 0.12776600  |
| C | -2.27410700 | -4.26157300 | 0.01667900  | C | 4.27510700 | 2.37058000  | 0.67753400  |
| C | -2.95083700 | -3.03576800 | -0.15013400 | H | 4.03854300 | 2.50798800  | 1.73898600  |
| C | -4.29749100 | -2.96219000 | 0.24076400  | H | 5.29180200 | 1.94738000  | 0.64717200  |
| C | -4.94968900 | -4.07012100 | 0.78133200  | C | 3.56708200 | 1.02862600  | -1.27358400 |
| H | -4.77194900 | -6.13936100 | 1.37243500  | H | 3.57088500 | 1.94766800  | -1.86721000 |
| H | -2.38982800 | -6.29793500 | 0.68904300  | H | 2.71783300 | 0.43055100  | -1.62000600 |
| H | -4.81863800 | -2.02050900 | 0.13455100  | C | 4.28064400 | 3.72972800  | -0.00188900 |
| H | -5.99060500 | -3.98382800 | 1.07899500  | C | 3.09564200 | 4.35340600  | -0.41525500 |
| C | -2.27338000 | -1.85111400 | -0.74633700 | C | 5.49168900 | 4.41392300  | -0.17025500 |
| C | -0.96852100 | -1.60589200 | -0.69075700 | C | 3.12103900 | 5.62913700  | -0.98026000 |
| C | 0.07882900  | -0.70711300 | -0.88608700 | H | 2.15062800 | 3.82953000  | -0.30223700 |
| H | 0.82487400  | -0.93821700 | -1.64554500 | C | 5.52003500 | 5.69302400  | -0.72980900 |
| C | 0.19046300  | 0.47006600  | -0.15829900 | H | 6.42062900 | 3.94366400  | 0.14535000  |
| H | -0.59931500 | 0.75571500  | 0.52187400  | C | 4.33355400 | 6.30436900  | -1.13767400 |
| H | 0.82717700  | 1.26940300  | -0.51621600 | H | 2.19277700 | 6.09775400  | -1.29613600 |
| C | -0.86099600 | -4.38607600 | -0.45880000 | H | 6.46892900 | 6.20826500  | -0.85021400 |
| H | -0.36631500 | -5.26177100 | -0.02661000 | H | 4.35317000 | 7.29767700  | -1.57689400 |
| H | -0.80759600 | -4.45634900 | -1.55491600 | C | 4.86001900 | 0.26282700  | -1.51682600 |
| O | -0.14482100 | -3.20068200 | -0.03478500 | C | 6.04885800 | 0.94873800  | -1.80800700 |
| H | 0.75929100  | -3.23292700 | -0.45641000 | C | 4.89667900 | -1.13918700 | -1.46194300 |
| N | -4.11562100 | -0.09463800 | -0.92760400 | C | 7.24399800 | 0.25762600  | -2.01509400 |
| C | -3.11124600 | -0.88879200 | -1.63235200 | H | 6.03436300 | 2.03308600  | -1.88553600 |
| C | -5.36450100 | 0.05858300  | -1.69144500 | C | 6.09109900 | -1.83294600 | -1.66906600 |
| C | -6.54776500 | 0.55050700  | -0.87259300 | C | 7.26975300 | -1.13622400 | -1.94147300 |
| C | -6.72586000 | 0.20226700  | 0.47322700  | H | 8.15295400 | 0.80752100  | -2.24278700 |
| C | -7.86205700 | 0.61454200  | 1.17232500  | H | 8.19791200 | -1.67559900 | -2.10750700 |
| C | -8.84247900 | 1.37747900  | 0.53515500  | H | 1.84205000 | 2.45736500  | 1.81363600  |
| C | -8.67454800 | 1.73200100  | -0.80476300 | C | 2.02565900 | -1.35435500 | 3.44324400  |
| C | -7.53338100 | 1.32582200  | -1.49837400 | C | 3.28325200 | -1.94983900 | 3.24386100  |
| C | -3.60504000 | 1.16190200  | -0.33766000 | C | 1.51727300 | -1.31966200 | 4.74944000  |
| C | -3.35463700 | 2.32466900  | -1.29288900 | C | 4.02076800 | -2.45192900 | 4.31693400  |
| C | -2.17063900 | 2.43988100  | -2.03969300 | H | 3.69550500 | -2.03232500 | 2.24187400  |
| C | -1.97200800 | 3.50915300  | -2.91583600 | C | 2.24864000 | -1.82601200 | 5.82622800  |
| C | -2.95339100 | 4.49175900  | -3.05705000 | H | 0.52422500 | -0.91628000 | 4.92418400  |
| C | -4.13193700 | 4.39767600  | -2.31468000 | C | 3.50848100 | -2.38566900 | 5.61434600  |
| C | -4.32782900 | 3.32519400  | -1.44262000 | H | 4.99330600 | -2.90210100 | 4.13782500  |
| H | -2.42492300 | -0.27486200 | -2.22870900 | H | 1.82913900 | -1.78830900 | 6.82760100  |
|   |             |             |             | H | 4.08141800 | -2.77820600 | 6.44935500  |

|   |             |             |             |
|---|-------------|-------------|-------------|
| C | 0.02791000  | 2.04738100  | 2.85017600  |
| C | -0.45401300 | 1.73707700  | 4.12939300  |
| C | -0.78230400 | 2.82617800  | 2.00776300  |
| C | -1.72245800 | 2.15146800  | 4.54087700  |
| H | 0.18190800  | 1.19372600  | 4.82145400  |
| C | -2.05131000 | 3.24205800  | 2.41335100  |
| H | -0.41209800 | 3.13074500  | 1.03179800  |
| C | -2.52839600 | 2.89784500  | 3.68033300  |
| H | -2.07312300 | 1.90348300  | 5.53876400  |
| H | -2.65816900 | 3.84494800  | 1.74378700  |
| H | -3.51257800 | 3.22687500  | 4.00132300  |
| H | 3.98172800  | -1.69841500 | -1.27709100 |
| H | 6.10222100  | -2.91956500 | -1.63030200 |
| O | 2.33229100  | -3.72075000 | -1.03093400 |
| C | 2.53886600  | -4.27007400 | -2.34012800 |
| H | 3.61451800  | -4.37919000 | -2.52575200 |
| H | 2.07593900  | -5.26391600 | -2.41150200 |
| C | 2.98837000  | -4.48264600 | -0.01229600 |
| H | 2.74390100  | -4.02320200 | 0.94744300  |
| H | 2.64462000  | -5.52548200 | -0.01878400 |
| H | 4.07461500  | -4.46246200 | -0.16132100 |
| C | 1.92876700  | -3.33767100 | -3.37811000 |
| H | 0.86580600  | -3.14521500 | -3.14040500 |
| H | 2.45325900  | -2.36747300 | -3.36843700 |
| O | 2.06371300  | -3.98412900 | -4.61690900 |
| C | 1.61611500  | -3.20190100 | -5.71000700 |
| H | 1.77042600  | -3.79874800 | -6.61108000 |
| H | 0.54640400  | -2.95703500 | -5.61918400 |
| H | 2.18723400  | -2.26508700 | -5.79506300 |

**5'**

|   |             |             |             |
|---|-------------|-------------|-------------|
| C | 4.41607900  | 1.86714800  | -1.47753100 |
| C | 4.75664600  | 0.54426100  | -1.18313600 |
| C | 3.88029300  | -0.27119300 | -0.47370000 |
| C | 2.61095000  | 0.19916400  | -0.06469300 |
| C | 2.29955400  | 1.54153600  | -0.34633900 |
| C | 3.18897700  | 2.36317800  | -1.04042400 |
| H | 5.10591600  | 2.50125800  | -2.02732800 |
| H | 5.72123100  | 0.14803700  | -1.49441800 |
| H | 1.36148200  | 1.96739600  | -0.01582100 |
| H | 2.91323500  | 3.39559900  | -1.23843500 |
| C | 1.71157200  | -0.72353800 | 0.65780900  |
| C | 2.07276200  | -2.04346200 | 0.73433800  |
| C | 1.37937000  | -3.09937400 | 1.46980700  |
| H | 0.51913600  | -2.80266000 | 2.05844300  |
| C | 1.75891200  | -4.38663500 | 1.48292600  |
| H | 1.21070400  | -5.12123500 | 2.06477400  |
| H | 2.61495000  | -4.73389500 | 0.91543900  |
| C | 4.29119800  | -1.64172800 | -0.01231500 |
| H | 4.99242700  | -2.11503300 | -0.70522800 |
| H | 4.78062700  | -1.58077500 | 0.97581400  |
| O | 3.18148700  | -2.53043500 | 0.08328200  |
| N | -0.83647900 | -0.23186800 | 0.46939300  |
| C | 0.40470400  | -0.21533000 | 1.27818900  |
| C | -1.21247400 | -1.54946600 | -0.04841200 |
| C | -2.68173900 | -1.65211600 | -0.42217200 |
| C | -3.67910800 | -1.27922300 | 0.49064000  |
| C | -5.02814700 | -1.41975100 | 0.16832400  |
| C | -5.40388900 | -1.93916000 | -1.07421000 |
| C | -4.42049800 | -2.31315500 | -1.99015200 |
| C | -3.06935000 | -2.16728400 | -1.66432300 |
| C | -0.98705600 | 0.82476200  | -0.53089800 |
| C | -1.21266900 | 2.21265300  | 0.04974700  |

|   |             |             |             |
|---|-------------|-------------|-------------|
| C | -1.82949200 | 2.39808000  | 1.29367400  |
| C | -2.08789000 | 3.68211800  | 1.77701400  |
| C | -1.73982300 | 4.80360300  | 1.02140400  |
| C | -1.12778500 | 4.63088200  | -0.22174900 |
| C | -0.86390400 | 3.34594400  | -0.69900100 |
| H | 0.19215300  | -0.79370800 | 2.18269300  |
| H | 0.54285400  | 0.81566200  | 1.61636700  |
| H | -0.59534600 | -1.85800700 | -0.91116600 |
| H | -1.01114000 | -2.27940300 | 0.74124400  |
| H | -3.38587600 | -0.87091700 | 1.45384500  |
| H | -5.78888000 | -1.12552800 | 0.88702400  |
| H | -6.45564500 | -2.04866400 | -1.32527300 |
| H | -4.70191300 | -2.71406200 | -2.96052200 |
| H | -2.30558300 | -2.45755900 | -2.38267500 |
| H | -0.15182800 | 0.85553500  | -1.25164800 |
| H | -1.87598900 | 0.56575700  | -1.11883700 |
| H | -2.10167800 | 1.52362300  | 1.87629500  |
| H | -2.56473700 | 3.80648100  | 2.74614900  |
| H | -1.94137800 | 5.80280000  | 1.39839700  |
| H | -0.85100500 | 5.49611500  | -0.81884600 |
| H | -0.38342800 | 3.21825500  | -1.66719000 |

**3'-DME**

|   |             |             |             |
|---|-------------|-------------|-------------|
| C | 1.93663300  | -0.76867400 | -0.95025000 |
| C | 1.33485000  | 0.07549300  | 0.18863200  |
| C | 0.17392800  | 0.94377300  | -0.28302900 |
| C | -1.06982700 | 0.55972900  | -0.11206100 |
| C | -2.31484400 | 0.17293900  | 0.03531200  |
| H | -2.88107800 | 0.47932500  | 0.91704500  |
| C | -3.07767200 | -0.67681100 | -0.95847600 |
| H | -3.90643000 | -0.08342100 | -1.36279100 |
| H | -2.42189900 | -0.94038300 | -1.80893000 |
| C | 3.15097200  | -1.57667400 | -0.50450700 |
| H | 3.93093600  | -0.88863200 | -0.13321200 |
| H | 2.87189200  | -2.23029800 | 0.34052800  |
| O | 3.61367600  | -2.33275500 | -1.61046000 |
| H | 4.36770800  | -2.87216400 | -1.30773100 |
| N | 0.46243300  | 3.49796000  | -0.23457400 |
| C | 0.50144600  | 2.25568400  | -1.01983800 |
| C | 1.45892000  | 3.59040800  | 0.83516400  |
| C | 2.89410000  | 3.62724500  | 0.34133700  |
| C | 3.24639500  | 4.35903000  | -0.80126300 |
| C | 4.57586900  | 4.43287800  | -1.21732700 |
| C | 5.57822800  | 3.78071400  | -0.49430200 |
| C | 5.23924500  | 3.05217300  | 0.64652100  |
| C | 3.90608300  | 2.97498700  | 1.05674000  |
| C | -0.88196800 | 3.84395800  | 0.23655700  |
| C | -1.03369900 | 5.31791100  | 0.57023200  |
| C | -0.63638800 | 6.30094100  | -0.34769100 |
| C | -0.81502700 | 7.65411700  | -0.06347100 |
| C | -1.39685500 | 8.04802300  | 1.14530800  |
| C | -1.79477300 | 7.07877900  | 2.06636900  |
| C | -1.61080000 | 5.72367800  | 1.77877500  |
| H | 1.50579300  | 2.17086300  | -1.44827200 |
| H | -0.19658800 | 2.38573300  | -1.85335600 |
| H | 1.25236300  | 4.52622800  | 1.36982500  |
| H | 1.34600300  | 2.78372700  | 1.58282400  |
| H | 2.46434700  | 4.86231300  | -1.36188400 |
| H | 4.83114700  | 5.00255000  | -2.10740400 |
| H | 6.61364800  | 3.83887100  | -0.81945600 |
| H | 6.01003800  | 2.53932100  | 1.21627300  |
| H | 3.64825400  | 2.40575300  | 1.94768900  |
| H | -1.58029800 | 3.58477500  | -0.56950900 |

|             |             |             |             |   |             |             |             |
|-------------|-------------|-------------|-------------|---|-------------|-------------|-------------|
| H           | -1.18825400 | 3.23952200  | 1.10891800  | H | 5.73761500  | -3.22834500 | -5.45917800 |
| H           | -0.17960000 | 5.99182000  | -1.28372900 | H | 3.36245400  | -3.83339600 | -5.71851600 |
| H           | -0.50204100 | 8.40393000  | -0.78576000 | H | 1.77569400  | -3.46459100 | -3.86965800 |
| H           | -1.53609500 | 9.10296300  | 1.36662600  | C | 7.00439800  | -2.21833400 | -3.15397400 |
| H           | -2.24357100 | 7.37473400  | 3.01114300  | C | 7.81301400  | -2.02500100 | -4.44839100 |
| H           | -1.91943200 | 4.97109900  | 2.50144700  | H | 8.86774900  | -1.84303700 | -4.22291900 |
| N           | -3.67157400 | -1.86515800 | -0.33009700 | H | 7.43676700  | -1.18785100 | -5.04629700 |
| C           | -4.71226900 | -2.46306800 | -1.17457500 | H | 7.78269900  | -2.92934400 | -5.06269100 |
| H           | -4.32837300 | -2.69979300 | -2.18655900 | C | 7.60535100  | -3.42411100 | -2.37269900 |
| C           | -2.65125200 | -2.84944500 | 0.04755200  | H | 8.65562700  | -3.23082400 | -2.12709900 |
| H           | -1.82677300 | -2.29002100 | 0.50490400  | H | 7.55174400  | -4.33328500 | -2.98184400 |
| H           | -2.22718200 | -3.35826500 | -0.84050400 | H | 7.06342400  | -3.60603900 | -1.43971800 |
| H           | -4.98204000 | -3.42183700 | -0.71548000 | C | 7.06404300  | -0.98326000 | -2.24750000 |
| C           | -3.15342000 | -3.88779500 | 1.03277400  | C | 8.08130500  | -0.02506500 | -2.29285600 |
| C           | -3.80064000 | -3.49229900 | 2.21272900  | C | 6.07993300  | -0.84967300 | -1.25585300 |
| C           | -2.94803500 | -5.25350700 | 0.80694300  | C | 8.13257200  | 1.01256000  | -1.36230300 |
| C           | -4.22789000 | -4.43956400 | 3.14218400  | H | 8.85355800  | -0.09142900 | -3.05110900 |
| H           | -3.97014900 | -2.43376300 | 2.38887000  | C | 6.10391100  | 0.18386800  | -0.29530700 |
| C           | -3.37147100 | -6.20597900 | 1.73784000  | C | 7.16070200  | 1.10650200  | -0.36946100 |
| H           | -2.45186600 | -5.57427900 | -0.10673200 | H | 8.93572800  | 1.74221400  | -1.40640800 |
| C           | -4.01320900 | -5.80124500 | 2.90846900  | H | 7.21133100  | 1.91642300  | 0.35076500  |
| H           | -4.72794100 | -4.11657400 | 4.05188300  | O | 5.05360300  | -1.77315800 | -1.20483100 |
| H           | -3.20441900 | -7.26246200 | 1.54394000  | P | 2.04458300  | -2.35782500 | -1.11932300 |
| H           | -4.34662500 | -6.53949600 | 3.63308600  | P | 4.79323600  | 0.32297400  | 1.01144000  |
| C           | -5.95877300 | -1.60682200 | -1.29585200 | C | 2.00510500  | -4.02320600 | -0.31225400 |
| C           | -6.55021400 | -1.37421300 | -2.54281000 | C | 1.57948200  | -5.18234500 | -0.98246100 |
| C           | -6.56638000 | -1.06710500 | -0.15280500 | C | 2.47114200  | -4.13581300 | 1.00614000  |
| C           | -7.72654200 | -0.62780700 | -2.65039800 | C | 1.60788800  | -6.42061400 | -0.34203600 |
| H           | -6.08564600 | -1.78185100 | -3.43829500 | H | 1.22243900  | -5.12101100 | -2.00629000 |
| C           | -7.73786000 | -0.31814900 | -0.25683500 | C | 2.50511800  | -5.37830100 | 1.64535300  |
| H           | -6.10495400 | -1.23563500 | 0.81582200  | H | 2.82316800  | -3.24489300 | 1.52027500  |
| C           | -8.32376200 | -0.09704900 | -1.50675900 | C | 2.07061300  | -6.52111100 | 0.97354000  |
| H           | -8.17064300 | -0.45730300 | -3.62780300 | H | 1.27454100  | -7.30898500 | -0.87161900 |
| H           | -8.19681200 | 0.09336200  | 0.63871600  | H | 2.87746900  | -5.45075500 | 2.66369200  |
| H           | -9.23692400 | 0.48687100  | -1.58706600 | H | 2.09716900  | -7.48834600 | 1.46790200  |
| H           | 0.99694800  | -0.58705300 | 0.99466200  | C | 0.40396600  | -2.21364200 | -1.96363700 |
| H           | 2.12052200  | 0.71752100  | 0.60777200  | C | 0.24822100  | -1.32884100 | -3.04674800 |
| H           | 1.17617500  | -1.45604600 | -1.34097600 | C | -0.74175600 | -2.83562300 | -1.43923000 |
| H           | 2.23944400  | -0.12569600 | -1.78660800 | C | -1.01163900 | -1.09233700 | -3.59910400 |
| O           | 5.27439600  | -4.35568300 | -0.56537600 | H | 1.11687100  | -0.83190900 | -3.47058300 |
| C           | 6.62916400  | -4.72585500 | -0.36945500 | C | -2.00287400 | -2.59006400 | -1.98943700 |
| H           | 6.71577000  | -5.45290900 | 0.45211100  | H | -0.65051200 | -3.52346900 | -0.60399800 |
| H           | 7.04226600  | -5.19113400 | -1.27754200 | C | -2.14341900 | -1.72065100 | -3.07241700 |
| C           | 4.42833100  | -5.44714600 | -0.89261500 | H | -1.10568700 | -0.41952400 | -4.44785500 |
| H           | 3.44383400  | -5.02307700 | -1.09924200 | H | -2.87960500 | -3.08379700 | -1.57928000 |
| H           | 4.78946700  | -5.97766900 | -1.78606000 | H | -3.12612100 | -1.54307300 | -3.49964500 |
| H           | 4.36211900  | -6.16065100 | -0.05840800 | C | 5.51767800  | -0.56301300 | 2.46283600  |
| C           | 7.41475700  | -3.46760300 | -0.02878600 | C | 6.89896500  | -0.72171700 | 2.65425800  |
| H           | 7.32703100  | -2.73827100 | -0.85155600 | C | 4.63557900  | -1.09170100 | 3.42004600  |
| H           | 6.99379300  | -2.99966600 | 0.87671000  | C | 7.38454000  | -1.39129500 | 3.77903700  |
| O           | 8.75731000  | -3.85282900 | 0.17096400  | H | 7.59890500  | -0.32911100 | 1.92325400  |
| C           | 9.59822500  | -2.76502700 | 0.48981200  | C | 5.12294900  | -1.75037300 | 4.55001800  |
| H           | 10.60654700 | -3.16549900 | 0.62264600  | H | 3.56318600  | -0.99154600 | 3.27164400  |
| H           | 9.61435400  | -2.01317800 | -0.31551800 | C | 6.49924100  | -1.90388100 | 4.72975500  |
| H           | 9.28472200  | -2.26748900 | 1.42176500  | H | 8.45620000  | -1.51197300 | 3.91171300  |
|             |             |             |             | H | 4.42777900  | -2.15075500 | 5.28301400  |
|             |             |             |             | H | 6.88043100  | -2.42449200 | 5.60385700  |
|             |             |             |             | C | 4.89115500  | 2.11058600  | 1.49923000  |
|             |             |             |             | C | 5.17700000  | 2.52153900  | 2.80955600  |
|             |             |             |             | C | 4.55813300  | 3.09124500  | 0.54523400  |
|             |             |             |             | C | 5.13147300  | 3.87543300  | 3.15807000  |
|             |             |             |             | H | 5.44332200  | 1.78710700  | 3.56276100  |
|             |             |             |             | C | 4.52625300  | 4.44217400  | 0.89134500  |
| <b>TS6'</b> |             |             |             |   |             |             |             |
| C           | 4.60390400  | -2.30610400 | -2.40089500 |   |             |             |             |
| C           | 5.52729100  | -2.51708800 | -3.43615100 |   |             |             |             |
| C           | 5.05425700  | -3.05821300 | -4.63474800 |   |             |             |             |
| C           | 3.71155500  | -3.40297700 | -4.78454800 |   |             |             |             |
| C           | 2.81935900  | -3.20105100 | -3.73549000 |   |             |             |             |
| C           | 3.23746600  | -2.63332900 | -2.52114900 |   |             |             |             |

|    |             |             |             |   |              |             |             |
|----|-------------|-------------|-------------|---|--------------|-------------|-------------|
| H  | 4.33978900  | 2.79941500  | -0.47902300 | C | -1.35648800  | 3.57250000  | 4.81040700  |
| C  | 4.80866600  | 4.83971700  | 2.20298600  | C | -0.92266100  | 4.35585800  | 5.88136800  |
| H  | 5.36397500  | 4.17300900  | 4.17709400  | C | 0.28458100   | 5.04932400  | 5.79608300  |
| H  | 4.29316300  | 5.18650200  | 0.13385200  | C | 1.04215900   | 4.96020100  | 4.62741600  |
| H  | 4.79058900  | 5.89260400  | 2.47115400  | C | 0.59669100   | 4.18609800  | 3.55437500  |
| Pd | 2.85048600  | -0.65398300 | 0.22191700  | H | -0.64990900  | -0.07081300 | 0.58035200  |
| C  | 1.02945300  | 2.34102900  | 0.50083500  | H | -1.31140500  | 1.46015200  | -0.01496500 |
| H  | 1.52801100  | 2.92165400  | 1.26385500  | H | 1.25759400   | 0.32944000  | 2.07498900  |
| N  | 0.59801300  | 2.98820200  | -0.57485500 | H | 1.03136300   | 1.52306800  | 3.35469500  |
| C  | 0.36553800  | 2.25579400  | -1.85211200 | H | -0.85919400  | 0.99105600  | 5.14020800  |
| H  | -0.61231200 | 2.55143300  | -2.24107300 | H | -1.70919500  | -0.85365500 | 6.54617200  |
| C  | 0.52940800  | 4.47362900  | -0.62850500 | H | -1.36735000  | -3.21630300 | 5.85341900  |
| H  | 1.14216800  | 4.85095900  | 0.19424200  | H | -0.15264100  | -3.71687100 | 3.73499500  |
| H  | 1.02749200  | 4.76239800  | -1.56013100 | H | 0.67324200   | -1.86511600 | 2.31593000  |
| H  | 1.40426200  | 1.32602600  | 0.34451100  | H | -1.51923200  | 3.32701200  | 1.67627400  |
| H  | 0.31260000  | 1.19323700  | -1.60925200 | H | -2.12548100  | 2.19208700  | 2.85832700  |
| C  | -0.86035900 | 5.07996600  | -0.56177800 | H | -2.30130300  | 3.04016200  | 4.89010500  |
| C  | -1.29308400 | 5.70422500  | 0.61634100  | H | -1.52814100  | 4.41974800  | 6.78096800  |
| C  | -1.71802000 | 5.07662700  | -1.67266000 | H | 0.63028000   | 5.65480800  | 6.62875900  |
| C  | -2.56249500 | 6.28054700  | 0.69563200  | H | 1.98348300   | 5.49567700  | 4.54281600  |
| H  | -0.63169700 | 5.74829800  | 1.47852000  | H | 1.20926600   | 4.15983500  | 2.66048000  |
| C  | -2.99190900 | 5.64056700  | -1.59350500 | N | -6.50160300  | 1.52179700  | -1.49001200 |
| H  | -1.38641000 | 4.64961600  | -2.61508200 | C | -7.29557000  | 2.69423100  | -1.11731600 |
| C  | -3.41776000 | 6.24025800  | -0.40595100 | H | -8.34830900  | 2.41885300  | -1.26462000 |
| H  | -2.87703400 | 6.76458200  | 1.61600600  | C | -7.04861800  | 0.26879400  | -0.95888500 |
| H  | -3.65020400 | 5.62543900  | -2.45732800 | H | -8.14190000  | 0.35346500  | -1.01530200 |
| H  | -4.40829200 | 6.68055600  | -0.35139100 | H | -6.80991600  | 0.12717600  | 0.10926700  |
| C  | 1.45219200  | 2.50161900  | -2.88220300 | H | -7.20505200  | 2.95290000  | -0.04564400 |
| C  | 2.70209400  | 1.87734700  | -2.74255800 | C | -6.63069200  | -0.97302000 | -1.73275100 |
| C  | 1.22604600  | 3.32478100  | -3.99215100 | C | -6.42548000  | -0.93682200 | -3.11829600 |
| C  | 3.70755500  | 2.08838300  | -3.68638000 | C | -6.52289100  | -2.20253000 | -1.06800800 |
| H  | 2.88055400  | 1.20424500  | -1.90225300 | C | -6.11312000  | -2.10220400 | -3.82257200 |
| C  | 2.23283500  | 3.53804100  | -4.93775300 | H | -6.51640500  | 0.01229900  | -3.63834800 |
| H  | 0.25433900  | 3.79387700  | -4.13008000 | C | -6.21575400  | -3.37093400 | -1.77141000 |
| C  | 3.47587600  | 2.92371800  | -4.78359000 | H | -6.67315000  | -2.25716300 | 0.00773500  |
| H  | 4.66648500  | 1.59062700  | -3.57031800 | C | -6.00731900  | -3.32441300 | -3.15194100 |
| H  | 2.04230700  | 4.17893800  | -5.79387300 | H | -5.96573600  | -2.05837800 | -4.89901800 |
| H  | 4.25823000  | 3.08637600  | -5.51948300 | H | -6.14700200  | -4.31151700 | -1.23023800 |
| C  | -4.40273100 | -1.35763100 | 1.87046000  | H | -5.77233900  | -4.23131200 | -3.70297700 |
| C  | -2.94277800 | -0.90409400 | 1.94001800  | C | -7.00730000  | 3.93306500  | -1.94953300 |
| C  | -2.66836300 | 0.40105700  | 1.20586900  | C | -6.75160400  | 3.84212500  | -3.32456100 |
| C  | -3.64038600 | 1.13872500  | 0.70637500  | C | -7.06807600  | 5.20247000  | -1.36139900 |
| C  | -4.57224000 | 1.86685200  | 0.14598500  | C | -6.55528900  | 4.99256000  | -4.09021200 |
| H  | -5.00442900 | 2.69786300  | 0.70546000  | H | -6.70855800  | 2.86012300  | -3.78646600 |
| C  | -5.05797200 | 1.67548800  | -1.29353400 | C | -6.88746500  | 6.35728200  | -2.12702300 |
| H  | -4.74174700 | 2.55237800  | -1.87157800 | H | -7.27287100  | 5.28862400  | -0.29608200 |
| H  | -4.56102100 | 0.80137500  | -1.72387400 | C | -6.62445600  | 6.25552800  | -3.49498800 |
| C  | -4.62451500 | -2.77988400 | 2.37776300  | H | -6.36097000  | 4.90423000  | -5.15605900 |
| H  | -4.03221700 | -3.48015700 | 1.76636700  | H | -6.95683300  | 7.33490200  | -1.65659300 |
| H  | -4.26425900 | -2.87790100 | 3.41596400  | H | -6.48500700  | 7.15159200  | -4.09360300 |
| O  | -6.01104900 | -3.07951200 | 2.29808600  | H | -5.04247700  | -0.67691400 | 2.44598100  |
| H  | -6.12116900 | -4.01245500 | 2.03138900  | H | -4.74934400  | -1.31291300 | 0.83365600  |
| N  | -0.38811300 | 1.59060000  | 1.83506900  | H | -2.62382400  | -0.82291500 | 2.98544600  |
| C  | -1.23439400 | 0.81243200  | 0.85977300  | H | -2.29547300  | -1.67384300 | 1.49462600  |
| C  | 0.50795900  | 0.79214200  | 2.73291700  | O | -10.12498900 | -5.26281800 | 1.46661000  |
| C  | -0.07062900 | -0.30583500 | 3.60412100  | C | -8.79701400  | -4.83259300 | 1.26173700  |
| C  | -0.72885800 | -0.03595500 | 4.81328200  | H | -8.65528000  | -4.44018500 | 0.24120100  |
| C  | -1.20027800 | -1.07836300 | 5.61280900  | H | -8.52170700  | -4.03241000 | 1.96760700  |
| C  | -1.00539600 | -2.40716200 | 5.22524000  | C | -11.06976500 | -4.22490100 | 1.30700800  |
| C  | -0.32750500 | -2.68792800 | 4.03771900  | H | -12.05638700 | -4.65865400 | 1.48754800  |
| C  | 0.13594300  | -1.64346900 | 3.23568900  | H | -10.89981700 | -3.40728700 | 2.02542900  |
| C  | -1.20773400 | 2.65882000  | 2.48810100  | H | -11.04328700 | -3.80473200 | 0.28897600  |
| C  | -0.60640600 | 3.46501900  | 3.62778200  | C | -7.91098300  | -6.05246400 | 1.47655200  |

|   |             |             |            |
|---|-------------|-------------|------------|
| H | -8.04385900 | -6.43599600 | 2.49884000 |
| H | -8.19783500 | -6.84859700 | 0.77482900 |
| O | -6.55127000 | -5.67710600 | 1.25910000 |
| C | -5.65210400 | -6.76139000 | 1.43576200 |
| H | -4.64559200 | -6.38191200 | 1.24359200 |
| H | -5.70145100 | -7.16058500 | 2.45935600 |
| H | -5.87261700 | -7.57386300 | 0.72914900 |

**INT5'**

|   |             |             |             |
|---|-------------|-------------|-------------|
| C | -1.52781200 | -3.00471400 | -0.19148200 |
| H | -1.80982100 | -3.78078400 | 0.52372600  |
| H | -2.40670800 | -2.73128600 | -0.77001100 |
| N | -0.45138900 | -3.36361100 | -1.05875000 |
| C | 0.35332000  | -4.53632400 | -0.64095600 |
| H | 0.48481500  | -4.48334700 | 0.44318600  |
| H | -0.19269200 | -5.47301200 | -0.84514100 |
| C | -0.85114300 | -3.48583600 | -2.49276300 |
| H | -1.64951000 | -4.23901700 | -2.59521600 |
| H | 0.02631000  | -3.88044500 | -3.01020400 |
| C | 1.71824100  | -4.59462200 | -1.30069900 |
| C | 2.63416800  | -3.54108100 | -1.15707000 |
| C | 2.09788300  | -5.72184100 | -2.03810200 |
| C | 3.90052000  | -3.61496000 | -1.73659800 |
| H | 2.35790900  | -2.65697400 | -0.58675500 |
| C | 3.36615800  | -5.80049100 | -2.61930900 |
| H | 1.39848700  | -6.54630500 | -2.15763300 |
| C | 4.26823700  | -4.74744800 | -2.46988100 |
| H | 4.60448800  | -2.79611500 | -1.61360600 |
| H | 3.64488000  | -6.68277600 | -3.18831300 |
| H | 5.25477400  | -4.80639000 | -2.92053800 |
| C | -1.27608300 | -2.19111000 | -3.14699000 |
| C | -0.31135800 | -1.26281500 | -3.56685300 |
| C | -2.63028200 | -1.89575400 | -3.35460100 |
| C | -0.69327200 | -0.05723000 | -4.15419600 |
| H | 0.74315300  | -1.49259900 | -3.43153800 |
| C | -3.01704000 | -0.68610800 | -3.94084800 |
| C | -2.04852400 | 0.23801700  | -4.33513800 |
| H | 0.06446400  | 0.64967700  | -4.48045400 |
| H | -2.34624300 | 1.17731300  | -4.79152600 |
| H | -3.38840200 | -2.62528600 | -3.07543600 |
| H | -4.07014700 | -0.47271300 | -4.10065600 |
| C | -2.02384300 | 2.23429100  | -0.46929800 |
| C | -1.19426600 | 1.78345000  | 0.74555800  |
| C | -0.21136100 | 0.65422300  | 0.44112900  |
| C | 1.08740600  | 0.82464600  | 0.59840100  |
| C | 2.38219200  | 0.96379400  | 0.71945400  |
| H | 2.86896800  | 0.69622800  | 1.65907200  |
| C | 3.31975200  | 1.42393800  | -0.38053600 |
| H | 3.81889600  | 0.53484200  | -0.78409600 |
| H | 2.74174400  | 1.87298200  | -1.20982200 |
| C | -2.90699500 | 3.44338000  | -0.16632800 |
| H | -3.53987500 | 3.22790000  | 0.71373100  |
| H | -2.27019200 | 4.30301800  | 0.10357300  |
| O | -3.68285600 | 3.70570200  | -1.31606500 |
| H | -4.17614600 | 4.54025700  | -1.17043000 |
| N | -1.26531500 | -1.73557400 | 0.70844200  |
| C | -0.65795100 | -0.64388100 | -0.20692100 |
| C | -2.61310000 | -1.20870000 | 1.28703400  |
| C | -3.80403000 | -2.14338400 | 1.33558600  |
| C | -4.71721700 | -2.13307600 | 0.26743500  |
| C | -5.86469800 | -2.92458400 | 0.29921300  |
| C | -6.12410500 | -3.72979600 | 1.41032700  |
| C | -5.23684200 | -3.72919000 | 2.48808700  |

|   |             |             |             |
|---|-------------|-------------|-------------|
| C | -4.08611000 | -2.93973200 | 2.45500900  |
| C | -0.23668400 | -2.04424300 | 1.81058400  |
| C | -0.70260300 | -2.80114500 | 3.03162600  |
| C | -0.79876400 | -4.20081400 | 3.07268200  |
| C | -1.18424500 | -4.85547100 | 4.24279100  |
| C | -1.46930200 | -4.12272900 | 5.39726200  |
| C | -1.35438900 | -2.73126800 | 5.37968800  |
| C | -0.96897400 | -2.07973600 | 4.20743200  |
| H | -1.41573400 | -0.46824700 | -0.97211400 |
| H | 0.18552200  | -1.13682500 | -0.68303200 |
| H | -2.37625900 | -0.82536300 | 2.27866300  |
| H | -2.87034000 | -0.36352000 | 0.65092500  |
| H | -4.53616700 | -1.48868400 | -0.59060800 |
| H | -6.56095000 | -2.90136000 | -0.53400800 |
| H | -7.02024800 | -4.34257100 | 1.44199000  |
| H | -5.44403700 | -4.33704100 | 3.36395600  |
| H | -3.41959000 | -2.93388600 | 3.30985700  |
| H | 0.58063500  | -2.55231600 | 1.29638100  |
| H | 0.13595800  | -1.06773400 | 2.11839700  |
| H | -0.56190500 | -4.79538400 | 2.19640100  |
| H | -1.25070800 | -5.93931900 | 4.25510900  |
| H | -1.76260500 | -4.63444900 | 6.30911300  |
| H | -1.55182400 | -2.15437700 | 6.27829100  |
| H | -0.85704800 | -0.99774100 | 4.21099200  |
| N | 4.36239600  | 2.30842700  | 0.13227700  |
| C | 5.51942100  | 2.36852300  | -0.77582400 |
| H | 5.22285400  | 2.70412800  | -1.78806900 |
| C | 3.83895000  | 3.64507100  | 0.44966100  |
| H | 2.90182200  | 3.49499200  | 1.00112800  |
| H | 3.57385600  | 4.20257500  | -0.46950400 |
| H | 6.19192500  | 3.13600100  | -0.37752500 |
| C | 4.78613600  | 4.47757400  | 1.29114500  |
| C | 5.28651700  | 3.97839600  | 2.50265400  |
| C | 5.15109000  | 5.76858200  | 0.89379600  |
| C | 6.12957200  | 4.75430300  | 3.29688800  |
| H | 5.01509800  | 2.97290800  | 2.81340600  |
| C | 5.99293600  | 6.55054000  | 1.68911300  |
| H | 4.77381100  | 6.16636400  | -0.04589300 |
| C | 6.48435300  | 6.04482200  | 2.89265600  |
| H | 6.51002600  | 4.35446800  | 4.23318100  |
| H | 6.26701800  | 7.55063500  | 1.36455100  |
| H | 7.14118700  | 6.64942400  | 3.51185000  |
| C | 6.25791900  | 1.04804600  | -0.87383200 |
| C | 6.49223300  | 0.44354000  | -2.11425900 |
| C | 6.73637700  | 0.41681600  | 0.28442800  |
| C | 7.19447600  | -0.76250600 | -2.20213300 |
| H | 6.13012700  | 0.92422200  | -3.02063600 |
| C | 7.43402000  | -0.78718700 | 0.20141200  |
| H | 6.55526500  | 0.87986600  | 1.25042100  |
| C | 7.66584800  | -1.38167300 | -1.04346600 |
| H | 7.37721600  | -1.21140500 | -3.17498100 |
| H | 7.80583700  | -1.26020300 | 1.10655700  |
| H | 8.21817200  | -2.31527800 | -1.10806600 |
| H | -0.61467100 | 2.63225800  | 1.12451800  |
| H | -1.87139500 | 1.49607300  | 1.56287400  |
| H | -1.35947300 | 2.48188500  | -1.30574700 |
| H | -2.68081900 | 1.42956300  | -0.82635600 |
| O | -5.21558500 | 6.01007500  | -0.81116800 |
| C | -6.60001700 | 5.76413500  | -1.04213200 |
| H | -7.20438300 | 6.58274800  | -0.62635700 |
| H | -6.80827600 | 5.70026000  | -2.12035300 |
| C | -4.77463600 | 7.24703300  | -1.35399900 |
| H | -3.70886700 | 7.33479400  | -1.13110400 |

|    |             |             |             |   |             |             |             |
|----|-------------|-------------|-------------|---|-------------|-------------|-------------|
| H  | -4.92284200 | 7.28316500  | -2.44281600 | C | 5.08722600  | 0.77616600  | -3.21999300 |
| H  | -5.31118300 | 8.08829200  | -0.89412700 | C | 5.96295900  | 1.54309900  | -4.00195900 |
| C  | -6.96530900 | 4.45035500  | -0.36435800 | C | 5.41019600  | 2.35441500  | -4.99739400 |
| H  | -6.32126200 | 3.64225900  | -0.74866700 | C | 4.03422500  | 2.37617600  | -5.22222000 |
| H  | -6.79001600 | 4.53142200  | 0.72176200  | C | 3.18837300  | 1.58162600  | -4.45195800 |
| O  | -8.32524900 | 4.20606500  | -0.64551800 | C | 3.69272500  | 0.76609300  | -3.42634100 |
| C  | -8.81167500 | 3.02986400  | -0.03682000 | H | 6.05539300  | 2.96958600  | -5.61463500 |
| H  | -9.86333500 | 2.93338000  | -0.31750500 | H | 3.62213200  | 3.00718900  | -6.00420100 |
| H  | -8.26505300 | 2.13698900  | -0.38206400 | H | 2.11974400  | 1.60636000  | -4.63769500 |
| H  | -8.73738200 | 3.07909300  | 1.06154700  | C | 7.46778800  | 1.37598300  | -3.76184100 |
|    |             |             |             | C | 8.27755100  | 2.55773100  | -4.32212500 |
| 4' |             |             |             | H | 9.34897000  | 2.40134200  | -4.16719800 |
| C  | -5.45699700 | 1.06490700  | -0.65778200 | H | 7.99493800  | 3.50726400  | -3.85494700 |
| C  | -4.45517000 | 1.11754700  | 0.51205800  | H | 8.13363000  | 2.64740600  | -5.40275200 |
| C  | -3.81189100 | -0.24676000 | 0.69800000  | C | 7.93473200  | 0.07470300  | -4.47854200 |
| C  | -2.52216500 | -0.44311400 | 0.81046400  | H | 9.00327800  | -0.09154600 | -4.30156400 |
| C  | -1.23382200 | -0.65733200 | 0.92590900  | H | 7.76973300  | 0.15752200  | -5.55865200 |
| H  | -0.77036500 | -0.65548800 | 1.91440900  | H | 7.38775900  | -0.80057000 | -4.11540800 |
| C  | -0.29735900 | -0.94408400 | -0.22779400 | C | 7.67620000  | 1.19699700  | -2.25337700 |
| H  | 0.08821800  | -1.96462900 | -0.11746400 | C | 8.79105000  | 1.66977700  | -1.55529700 |
| H  | -0.85426400 | -0.90917100 | -1.18226400 | C | 6.72146500  | 0.45446800  | -1.54187800 |
| C  | -6.39522500 | -0.13450100 | -0.49990800 | C | 8.95942600  | 1.39021200  | -0.19964400 |
| H  | -7.02438300 | -0.00534300 | 0.39987200  | H | 9.54504900  | 2.25363200  | -2.07132700 |
| H  | -7.05942000 | -0.23700800 | -1.36362000 | C | 6.85522500  | 0.15951100  | -0.16954000 |
| O  | -5.67387000 | -1.35635200 | -0.41455800 | C | 8.00490000  | 0.63872000  | 0.48062400  |
| C  | -4.81138900 | -1.39350600 | 0.71665000  | H | 9.83645800  | 1.75664600  | 0.32566700  |
| H  | -5.41627200 | -1.33478500 | 1.64092200  | H | 8.14270400  | 0.43322700  | 1.53683100  |
| H  | -4.30777500 | -2.36214000 | 0.69476000  | O | 5.60754800  | -0.01652900 | -2.21322600 |
| N  | 0.86538500  | -0.04609200 | -0.23139700 | P | 2.58497400  | -0.30543700 | -2.39055400 |
| C  | 1.94627800  | -0.56096800 | -1.08044200 | P | 5.56355900  | -0.79878000 | 0.76174600  |
| H  | 1.59385800  | -0.75789300 | -2.11215900 | C | 2.53785700  | -1.88453200 | -3.35154000 |
| C  | 0.49462700  | 1.32466000  | -0.60044400 | C | 2.45796000  | -1.91596800 | -4.75367700 |
| H  | -0.42843700 | 1.55932000  | -0.05719900 | C | 2.60510100  | -3.09745400 | -2.64962400 |
| H  | 0.25054000  | 1.40471100  | -1.67816500 | C | 2.43122600  | -3.13384100 | -5.43352100 |
| H  | 2.69618400  | 0.23546600  | -1.15760800 | H | 2.42615600  | -0.98868900 | -5.31829000 |
| C  | 1.55396900  | 2.35062700  | -0.24515900 | C | 2.57859600  | -4.31642000 | -3.33101200 |
| C  | 2.08516000  | 2.40255900  | 1.05202300  | H | 2.70345500  | -3.07524700 | -1.56699200 |
| C  | 1.99263300  | 3.28814700  | -1.18692300 | C | 2.48952300  | -4.33620300 | -4.72339600 |
| C  | 3.02854000  | 3.36953500  | 1.39659300  | H | 2.37126600  | -3.14422600 | -6.51839800 |
| H  | 1.75412000  | 1.67188200  | 1.78468300  | H | 2.64082900  | -5.24815000 | -2.77526700 |
| C  | 2.93523800  | 4.26138800  | -0.84442000 | H | 2.47505300  | -5.28322600 | -5.25578400 |
| H  | 1.59238200  | 3.25608600  | -2.19818200 | C | 0.91327300  | 0.44648700  | -2.67294600 |
| C  | 3.45620700  | 4.30434000  | 0.44891800  | C | 0.67440500  | 1.74286900  | -2.17667600 |
| H  | 3.43049300  | 3.39649900  | 2.40633500  | C | -0.15433200 | -0.25252400 | -3.25673700 |
| H  | 3.26473700  | 4.98039000  | -1.59009800 | C | -0.58824000 | 2.32734900  | -2.28045900 |
| H  | 4.19163600  | 5.05802600  | 0.71780400  | H | 1.48527200  | 2.30455300  | -1.71942500 |
| C  | 2.60733800  | -1.80901300 | -0.52648800 | C | -1.42320300 | 0.32996100  | -3.34772500 |
| C  | 2.84210500  | -2.91969800 | -1.34502100 | H | 0.00204500  | -1.25124800 | -3.65133000 |
| C  | 3.03391100  | -1.85598300 | 0.80877800  | C | -1.64460000 | 1.61999200  | -2.86497800 |
| C  | 3.49561400  | -4.05067200 | -0.84871900 | H | -0.74547600 | 3.33758500  | -1.91103800 |
| H  | 2.51072600  | -2.89883800 | -2.38117300 | H | -2.23480600 | -0.22638800 | -3.80916200 |
| C  | 3.68255300  | -2.98450100 | 1.30855700  | H | -2.62890200 | 2.07310200  | -2.94310000 |
| H  | 2.84444300  | -1.00068600 | 1.45077700  | C | 6.17358100  | -2.54250900 | 0.69356000  |
| C  | 3.91757900  | -4.08616700 | 0.48053800  | C | 7.51193100  | -2.88015500 | 0.44147300  |
| H  | 3.66840300  | -4.90388800 | -1.49967200 | C | 5.24672100  | -3.57417600 | 0.91705700  |
| H  | 4.00757800  | -3.00529200 | 2.34580800  | C | 7.91203200  | -4.21800000 | 0.41720100  |
| H  | 4.42338800  | -4.96545100 | 0.87076500  | H | 8.24468900  | -2.10028600 | 0.25957500  |
| H  | -3.69570600 | 1.88916000  | 0.35308000  | C | 5.64980200  | -4.90980800 | 0.90554600  |
| H  | -4.99950900 | 1.38140500  | 1.43275400  | H | 4.20328100  | -3.32147100 | 1.09102000  |
| H  | -6.04191000 | 1.99247800  | -0.70623000 | C | 6.98443700  | -5.23455700 | 0.65210900  |
| H  | -4.91182100 | 0.96418400  | -1.60420800 | H | 8.95080600  | -4.46451900 | 0.21518600  |
|    |             |             |             | H | 4.92181500  | -5.69676200 | 1.08437000  |
|    |             |             |             | H | 7.29879300  | -6.27436000 | 0.63302700  |

TS8'

|    |             |             |             |   |              |             |             |
|----|-------------|-------------|-------------|---|--------------|-------------|-------------|
| C  | 5.89504400  | -0.29067100 | 2.51340100  | C | -8.86028600  | 6.17282300  | -1.22563000 |
| C  | 6.39474400  | -1.16772700 | 3.48645700  | C | -8.54765100  | 6.72452500  | -2.47205200 |
| C  | 5.56893900  | 1.02424700  | 2.89418700  | C | -7.65614300  | 6.06290700  | -3.31575600 |
| C  | 6.56352000  | -0.74102300 | 4.80789800  | C | -7.08050600  | 4.85482700  | -2.91294000 |
| H  | 6.66018000  | -2.18488700 | 3.21694600  | C | -4.79472500  | 3.70857400  | -0.06349500 |
| C  | 5.75255100  | 1.45194400  | 4.20835200  | C | -4.88681300  | 5.17826400  | 0.31780500  |
| H  | 5.17716900  | 1.71959500  | 2.15545800  | C | -5.58494200  | 5.57666000  | 1.46519800  |
| C  | 6.24681500  | 0.56716200  | 5.17228600  | C | -5.59736400  | 6.91308100  | 1.86188600  |
| H  | 6.95278600  | -1.43431400 | 5.54868900  | C | -4.90762600  | 7.87428700  | 1.11710100  |
| H  | 5.50940300  | 2.47561800  | 4.48117800  | C | -4.21064500  | 7.48777200  | -0.02781300 |
| H  | 6.38488200  | 0.89810600  | 6.19777900  | C | -4.20247300  | 6.14744300  | -0.42208900 |
| Pd | 3.52043400  | -0.52504400 | -0.29242400 | H | -6.97663900  | 1.26582000  | 0.76470300  |
| C  | 0.76507600  | -0.08608000 | 1.40419900  | H | -5.59089400  | 1.84748300  | 1.68383100  |
| H  | 1.42573500  | -0.94518900 | 1.44865200  | H | -6.18751600  | 2.57333400  | -2.09755600 |
| N  | 0.90664900  | 0.85413500  | 2.32689000  | H | -7.63190400  | 2.23928800  | -1.13487700 |
| C  | 0.35877400  | 2.20704300  | 2.10107200  | H | -8.52209300  | 4.54329600  | 0.14279700  |
| H  | -0.21721100 | 2.49764500  | 2.98429500  | H | -9.55485100  | 6.68376800  | -0.56416700 |
| C  | 1.81639000  | 0.67045800  | 3.49729900  | H | -8.99781300  | 7.66394700  | -2.78108700 |
| H  | 2.19507500  | -0.35197100 | 3.44359400  | H | -7.40708400  | 6.48425600  | -4.28608600 |
| H  | 2.66920700  | 1.33651300  | 3.33444900  | H | -6.38799300  | 4.33984800  | -3.57601500 |
| H  | 0.41718200  | 0.21677000  | 0.42547800  | H | -4.09534200  | 3.22191400  | 0.62767000  |
| H  | -0.34850100 | 2.12923300  | 1.27072700  | H | -4.33270100  | 3.61995400  | -1.06227100 |
| C  | 1.19948700  | 0.94353100  | 4.85562200  | H | -6.13468300  | 4.83202200  | 2.03448900  |
| C  | 0.77584600  | -0.11083700 | 5.67647700  | H | -6.14793600  | 7.20745700  | 2.75177800  |
| C  | 1.10175100  | 2.25494800  | 5.34590100  | H | -4.92080600  | 8.91662600  | 1.42394500  |
| C  | 0.23277600  | 0.13751300  | 6.93858000  | H | -3.68121300  | 8.22891900  | -0.62090800 |
| H  | 0.89535800  | -1.13880900 | 5.34436800  | H | -3.66544400  | 5.85422900  | -1.32216700 |
| C  | 0.55342300  | 2.50686000  | 6.60436800  | N | -0.93077000  | -1.37932100 | 1.59953400  |
| H  | 1.47401000  | 3.08269600  | 4.74774200  | C | -0.55216100  | -2.22101700 | 2.78139600  |
| C  | 0.11139400  | 1.44890100  | 7.40132900  | H | 0.19192100   | -2.93911500 | 2.42256300  |
| H  | -0.08202500 | -0.69419700 | 7.56233800  | C | -0.89495900  | -2.07408200 | 0.27925300  |
| H  | 0.48525400  | 3.52833500  | 6.96777500  | H | 0.16097900   | -2.29781700 | 0.08483700  |
| H  | -0.30821800 | 1.64421400  | 8.38397000  | H | -1.20187300  | -1.33184000 | -0.46325400 |
| C  | 1.41092700  | 3.26222300  | 1.79522200  | H | -0.04856100  | -1.53789700 | 3.47068800  |
| C  | 2.52822000  | 2.98312300  | 0.99531600  | C | -1.69770200  | -3.34750200 | 0.09178700  |
| C  | 1.22285200  | 4.56632300  | 2.27092200  | C | -1.02863100  | -4.56028900 | -0.12233800 |
| C  | 3.43751100  | 3.99546600  | 0.67971500  | C | -3.09965700  | -3.34053300 | 0.06229300  |
| H  | 2.70670300  | 1.97406000  | 0.62007000  | C | -1.74222700  | -5.74185100 | -0.33814700 |
| C  | 2.12882100  | 5.57910300  | 1.94841900  | H | 0.05948300   | -4.57997500 | -0.12954000 |
| H  | 0.35793200  | 4.79544600  | 2.88986700  | C | -3.81976900  | -4.51762100 | -0.14626800 |
| C  | 3.23977900  | 5.29517700  | 1.15277100  | H | -3.63276200  | -2.40509400 | 0.19665800  |
| H  | 4.29960500  | 3.76432000  | 0.05969800  | C | -3.13798400  | -5.72251900 | -0.34287300 |
| H  | 1.96706500  | 6.58585900  | 2.32286500  | H | -1.20772500  | -6.67301200 | -0.50572400 |
| H  | 3.94796200  | 6.08036100  | 0.90414100  | H | -4.90735600  | -4.49128800 | -0.16440100 |
| C  | -6.45776400 | -1.50355700 | -0.37756000 | H | -3.69446000  | -6.64076400 | -0.50920100 |
| C  | -5.68796200 | -0.34045100 | -1.03218400 | C | -1.63894400  | -2.93900800 | 3.57016400  |
| C  | -5.07505900 | 0.59708900  | 0.00174900  | C | -1.98365300  | -4.27293200 | 3.31317800  |
| C  | -3.81871400 | 0.46543100  | 0.35420800  | C | -2.26395800  | -2.28168400 | 4.64223700  |
| C  | -2.56293600 | 0.34104300  | 0.72223400  | C | -2.94230600  | -4.92334800 | 4.09113300  |
| H  | -1.80757200 | 0.93326400  | 0.20417800  | H | -1.50397300  | -4.80863500 | 2.50106100  |
| C  | -2.12177900 | -0.53334500 | 1.87497700  | C | -3.22796300  | -2.92767000 | 5.41696500  |
| H  | -1.84026200 | 0.09119100  | 2.73571000  | H | -1.98311100  | -1.25943200 | 4.88491100  |
| H  | -2.96074700 | -1.15529900 | 2.20184500  | C | -3.57192300  | -4.25203900 | 5.14062300  |
| C  | -6.92005900 | -2.55456300 | -1.38523100 | H | -3.19514300  | -5.95756700 | 3.87573900  |
| H  | -7.74737300 | -2.15841200 | -1.99659400 | H | -3.70101800  | -2.40026900 | 6.24071300  |
| H  | -6.09017000 | -2.78724800 | -2.07571700 | H | -4.31830800  | -4.76005600 | 5.74472900  |
| O  | -7.31451100 | -3.70663300 | -0.66019500 | H | -4.89136400  | -0.75043200 | -1.66463500 |
| H  | -7.77830400 | -4.31432500 | -1.27314500 | H | -6.35758100  | 0.22385600  | -1.69233400 |
| N  | -6.06039500 | 2.96730400  | 0.00009500  | H | -5.80828100  | -2.00368700 | 0.34992400  |
| C  | -5.96131400 | 1.66894800  | 0.66964100  | H | -7.32329900  | -1.13498900 | 0.18683600  |
| C  | -6.80681200 | 2.95221000  | -1.26276200 | O | -8.90460000  | -5.29415300 | -2.37291300 |
| C  | -7.38629500 | 4.29536900  | -1.66861700 | C | -10.28732500 | -4.97959900 | -2.23280000 |
| C  | -8.28517000 | 4.96745200  | -0.82923300 | H | -10.53327400 | -4.05914400 | -2.78356500 |



|   |              |             |             |
|---|--------------|-------------|-------------|
| H | -10.90296900 | -5.79333600 | -2.64190100 |
| C | -8.53592300  | -5.59973100 | -3.70815600 |
| H | -7.46619600  | -5.82228900 | -3.70477000 |
| H | -9.08577900  | -6.47730200 | -4.07613800 |
| H | -8.72969900  | -4.75328900 | -4.38370700 |
| C | -10.58810900 | -4.79388400 | -0.75128000 |
| H | -10.39736200 | -5.73644900 | -0.21163600 |
| H | -9.91976400  | -4.02819200 | -0.32575300 |
| O | -11.94276600 | -4.41271100 | -0.65522500 |
| C | -12.37072500 | -4.23814600 | 0.67938500  |
| H | -13.42246600 | -3.94357700 | 0.64361500  |
| H | -12.27862400 | -5.16932000 | 1.26075300  |
| H | -11.79416500 | -3.45115700 | 1.19134900  |

|   |             |            |             |
|---|-------------|------------|-------------|
| C | -3.48214800 | 3.68128300 | -0.14299800 |
| C | -3.92265600 | 5.11454900 | 0.10246300  |
| C | -3.85990000 | 5.66534400 | 1.39047100  |
| C | -4.29990300 | 6.96642000 | 1.62782900  |
| C | -4.81065800 | 7.73753400 | 0.57907500  |
| C | -4.87554100 | 7.19964100 | -0.70620900 |
| C | -4.43138800 | 5.89549400 | -0.94078100 |
| C | -1.08514300 | 4.05916400 | -0.44480900 |
| C | 0.24977200  | 4.19399800 | 0.26585900  |
| C | 0.31997800  | 4.56610700 | 1.61531500  |
| C | 1.55465300  | 4.74359100 | 2.24126700  |
| C | 2.74078800  | 4.55981600 | 1.52568300  |
| C | 2.68278700  | 4.19527600 | 0.17908600  |
| C | 1.44452400  | 4.00766300 | -0.44052800 |

**INT6'**

|   |             |             |             |
|---|-------------|-------------|-------------|
| C | 3.49724200  | -1.39241000 | -1.34455200 |
| H | 3.95045600  | -2.24226500 | -1.86013800 |
| N | 4.39261800  | -0.78184300 | -0.43578200 |
| C | 4.46687300  | 0.71002400  | -0.48192600 |
| H | 5.04584400  | 1.01287200  | 0.39344900  |
| C | 5.71231700  | -1.44552500 | -0.32792600 |
| H | 5.53665300  | -2.52719700 | -0.37817300 |
| H | 6.34003800  | -1.19800800 | -1.19685600 |
| H | 3.10702500  | -0.70357000 | -2.09509600 |
| H | 3.45791200  | 1.10443000  | -0.33662900 |
| C | 6.47968100  | -1.13004900 | 0.94343600  |
| C | 7.88043300  | -1.13069400 | 0.90483800  |
| C | 5.84111700  | -0.89756000 | 2.16795900  |
| C | 8.62685100  | -0.91983300 | 2.06527900  |
| H | 8.39196800  | -1.30535200 | -0.03936200 |
| C | 6.58497100  | -0.67608300 | 3.32816800  |
| H | 4.75611900  | -0.86875200 | 2.20735700  |
| C | 7.98032200  | -0.69132600 | 3.28124000  |
| H | 9.71196800  | -0.92678600 | 2.01687800  |
| H | 6.07427200  | -0.49101200 | 4.26912800  |
| H | 8.55906100  | -0.51997900 | 4.18412500  |
| C | 5.08426200  | 1.29221800  | -1.74121200 |
| C | 4.28521200  | 1.67107100  | -2.83126100 |
| C | 6.47383200  | 1.46606800  | -1.84177800 |
| C | 4.85607100  | 2.18169200  | -3.99877200 |
| H | 3.20134900  | 1.59637500  | -2.76144400 |
| C | 7.04794000  | 1.97599500  | -3.00720900 |
| H | 7.10797600  | 1.21851500  | -0.99387400 |
| C | 6.24100200  | 2.32900700  | -4.09107500 |
| H | 4.21967000  | 2.47664400  | -4.82840900 |
| H | 8.12465000  | 2.10849900  | -3.06457100 |
| H | 6.68748900  | 2.73127800  | -4.99576200 |
| C | -3.60688300 | -0.56708500 | -0.32393900 |
| C | -2.78722400 | 0.44473200  | -1.14896400 |
| C | -1.61009300 | 1.00032200  | -0.35918000 |
| C | -0.39376400 | 0.56248200  | -0.56953900 |
| C | 0.84682900  | 0.15209600  | -0.72546100 |
| H | 1.51180000  | 0.72100500  | -1.37388400 |
| C | 1.42890500  | -0.97040800 | 0.09636500  |
| H | 2.15866000  | -0.59839300 | 0.82132900  |
| H | 0.64249900  | -1.48719000 | 0.64336100  |
| C | -4.62433400 | -1.34327700 | -1.15978300 |
| H | -5.47316900 | -0.69756000 | -1.43200500 |
| H | -4.15181500 | -1.66910100 | -2.10339400 |
| O | -5.04802400 | -2.45952400 | -0.39494800 |
| H | -5.88808100 | -2.79422400 | -0.77568800 |
| N | -2.12743500 | 3.41026200  | 0.35121700  |
| C | -1.84285700 | 2.03959900  | 0.75984600  |

|   |             |             |             |
|---|-------------|-------------|-------------|
| H | -2.67905100 | 1.69770700  | 1.38128500  |
| H | -0.95243900 | 2.05719000  | 1.39425100  |
| H | -3.59308500 | 3.45824800  | -1.21950400 |
| H | -4.15927200 | 2.99982900  | 0.38827200  |
| H | -3.45973000 | 5.06633500  | 2.20421300  |
| H | -4.24795000 | 7.38046400  | 2.63128400  |
| H | -5.15383800 | 8.75149400  | 0.76476800  |
| H | -5.26682300 | 7.79349900  | -1.52770800 |
| H | -4.48278100 | 5.48060900  | -1.94541800 |
| H | -0.92836300 | 3.54984300  | -1.41361700 |
| H | -1.45987100 | 5.06231700  | -0.68222200 |
| H | -0.60284500 | 4.71758700  | 2.16781600  |
| H | 1.59096400  | 5.03581900  | 3.28747500  |
| H | 3.70121400  | 4.70910800  | 2.01163800  |
| H | 3.59820000  | 4.06369800  | -0.39259100 |
| H | 1.40395300  | 3.73416100  | -1.49341600 |
| N | 2.18977900  | -2.03257400 | -0.69073500 |
| C | 2.66741700  | -3.17037200 | 0.25461300  |
| H | 2.78876000  | -4.04338900 | -0.38963900 |
| C | 1.38820300  | -2.54966500 | -1.89998300 |
| H | 2.13550100  | -2.98447500 | -2.56846300 |
| H | 0.99220600  | -1.64886200 | -2.37346600 |
| H | 3.64900200  | -2.83835800 | 0.58792100  |
| C | 0.29321300  | -3.55822200 | -1.66823200 |
| C | 0.50703200  | -4.89657400 | -2.03137600 |
| C | -0.97175000 | -3.17831100 | -1.19650900 |
| C | -0.51297700 | -5.84042300 | -1.89771000 |
| H | 1.47016600  | -5.20192000 | -2.43520900 |
| C | -1.99515800 | -4.11736600 | -1.05965500 |
| H | -1.16237100 | -2.13986600 | -0.94571900 |
| C | -1.76116300 | -5.45174200 | -1.40633500 |
| H | -0.33512000 | -6.87208600 | -2.18704100 |
| H | -2.97435700 | -3.80484700 | -0.70213300 |
| H | -2.55702600 | -6.18449600 | -1.30803100 |
| C | 1.84478900  | -3.49707800 | 1.48271200  |
| C | 0.88009100  | -4.51481300 | 1.48696100  |
| C | 2.12881200  | -2.83567800 | 2.68955900  |
| C | 0.19840100  | -4.83937200 | 2.66058200  |
| H | 0.66591400  | -5.06543400 | 0.57860300  |
| C | 1.44396000  | -3.15492100 | 3.86064600  |
| H | 2.90662200  | -2.07698400 | 2.71799000  |
| C | 0.47116100  | -4.15675500 | 3.84686700  |
| H | -0.54306500 | -5.63264800 | 2.64604100  |
| H | 1.67935100  | -2.63303000 | 4.78350900  |
| H | -0.06030100 | -4.41314300 | 4.75869700  |
| H | -2.41194200 | -0.04959100 | -2.05320500 |
| H | -3.43077800 | 1.26491500  | -1.48625500 |
| H | -2.92796200 | -1.29823600 | 0.13136900  |
| H | -4.12262900 | -0.07304400 | 0.50807500  |

|   |             |             |             |   |             |             |             |
|---|-------------|-------------|-------------|---|-------------|-------------|-------------|
| O | -7.57915600 | -3.17487000 | -1.36149300 | H | -5.03225300 | -3.90747600 | 0.38764500  |
| C | -8.55683700 | -3.16995300 | -0.32278200 | C | 3.68974300  | 0.01236400  | 0.23663200  |
| H | -9.56645600 | -3.14679600 | -0.75643200 | H | 4.59982700  | 0.49996800  | -0.13238700 |
| H | -8.47114500 | -4.07729800 | 0.29306700  | N | 2.51614100  | 0.49980900  | -0.56582300 |
| C | -7.75297500 | -4.24445900 | -2.27938800 | C | 2.53377700  | -0.02855400 | -1.95726600 |
| H | -6.95760200 | -4.16345600 | -3.02406200 | H | 3.16216400  | 0.61592200  | -2.58775400 |
| H | -7.68398900 | -5.22015400 | -1.77674600 | C | 2.41218500  | 1.98245300  | -0.48512300 |
| H | -8.72714300 | -4.17341500 | -2.78232200 | H | 2.27760000  | 2.22365800  | 0.57587500  |
| C | -8.33223800 | -1.93483700 | 0.53932700  | H | 1.48535700  | 2.26379600  | -0.99090500 |
| H | -7.30076200 | -1.93239100 | 0.92744700  | H | 3.51041700  | 0.38614300  | 1.25676200  |
| H | -8.46157500 | -1.02594600 | -0.07274400 | N | 3.90556300  | -1.40738800 | 0.17752200  |
| O | -9.27868100 | -1.98737100 | 1.58251400  | C | 5.29824700  | -1.86319000 | -0.01815000 |
| C | -9.19436300 | -0.88312900 | 2.45887300  | H | 5.79234900  | -1.10913800 | -0.64058500 |
| H | -9.96287400 | -1.02036100 | 3.22333000  | H | 5.85888500  | -1.90518900 | 0.92889600  |
| H | -8.20826100 | -0.82679800 | 2.94717900  | C | 3.05189400  | -2.26917000 | 0.98934500  |
| H | -9.37756200 | 0.06759000  | 1.93320100  | H | 3.37686300  | -3.29839000 | 0.79959400  |

### TS9'

|   |             |             |             |   |             |             |             |
|---|-------------|-------------|-------------|---|-------------|-------------|-------------|
| C | -3.06056400 | 3.53926000  | -1.39150700 | C | 5.39931000  | -3.21500800 | -0.69988300 |
| C | -3.42777700 | 2.07443700  | -1.13264600 | C | 5.07778700  | -3.35736000 | -2.05780800 |
| C | -2.69692500 | 1.38942800  | 0.01031100  | C | 5.83062300  | -4.34199800 | 0.00989800  |
| C | -1.44167800 | 1.50120100  | 0.34933700  | C | 5.18039200  | -4.59643900 | -2.68792400 |
| C | -0.29150800 | 1.20181900  | 1.05627000  | H | 4.76035300  | -2.48774000 | -2.62856100 |
| H | 0.00106900  | 1.85459600  | 1.87768900  | C | 5.93376000  | -5.58675700 | -0.61738800 |
| C | 0.46015500  | 0.07835300  | 0.77715400  | H | 6.09307800  | -4.24428300 | 1.06118200  |
| H | 0.15598800  | -0.60779500 | -0.00181100 | C | 5.60751900  | -5.71602000 | -1.96724600 |
| H | 1.19766400  | -0.26060800 | 1.49334500  | H | 4.93635200  | -4.68931200 | -3.74270100 |
| C | -1.61245800 | 3.71891700  | -1.82962500 | H | 6.27197000  | -6.45047500 | -0.05182300 |
| H | -1.42003800 | 3.16917700  | -2.75573000 | H | 5.69102500  | -6.68105000 | -2.45908000 |
| H | -1.37986300 | 4.77720500  | -1.99755600 | C | 3.00743100  | -2.03676500 | 2.50084700  |
| O | -0.70156900 | 3.18365800  | -0.85686100 | C | 4.03125900  | -1.39707800 | 3.21234900  |
| H | -0.53299500 | 3.88346800  | -0.17584800 | C | 1.90700600  | -2.52918000 | 3.21992500  |
| N | -4.25538300 | -0.53820300 | 0.06260500  | C | 3.95925600  | -1.25657300 | 4.60094900  |
| C | -3.56958600 | 0.43967200  | 0.88090400  | H | 4.89633200  | -1.00599300 | 2.68615600  |
| C | -5.66219900 | -0.77180600 | 0.42124300  | C | 1.83580900  | -2.39749900 | 4.60705900  |
| C | -6.47778800 | -1.39964300 | -0.69658800 | C | 2.86305800  | -1.75700500 | 5.30389300  |
| C | -6.33106300 | -0.98558500 | -2.02747400 | H | 4.76582500  | -0.75910400 | 5.13274100  |
| C | -7.12877500 | -1.53084500 | -3.03378800 | H | 2.80997500  | -1.65168100 | 6.38365200  |
| C | -8.09073000 | -2.49579300 | -2.72374300 | H | 3.02634900  | -1.00061400 | -1.89013500 |
| C | -8.24629300 | -2.91352300 | -1.40150200 | C | 3.57449400  | 2.80707300  | -1.02267800 |
| C | -7.44113400 | -2.37086100 | -0.39716700 | C | 4.65579000  | 3.14925100  | -0.19413300 |
| C | -3.46771300 | -1.75793300 | -0.21971800 | C | 3.57485900  | 3.29070700  | -2.33999800 |
| C | -3.30879700 | -2.73506700 | 0.93628100  | C | 5.71525600  | 3.92119700  | -0.67302200 |
| C | -2.26166000 | -2.61464400 | 1.86323500  | H | 4.66315100  | 2.81862100  | 0.84236300  |
| C | -2.14767200 | -3.49787000 | 2.93882800  | C | 4.63226300  | 4.06368900  | -2.82475700 |
| C | -3.07466000 | -4.52912300 | 3.09987200  | H | 2.73158000  | 3.07612100  | -2.99125300 |
| C | -4.11205900 | -4.67229300 | 2.17660800  | C | 5.70907200  | 4.37590100  | -1.99347000 |
| C | -4.22608000 | -3.78312700 | 1.10653800  | H | 6.54080900  | 4.17371800  | -0.01342700 |
| H | -2.96914500 | 0.00397200  | 1.68948500  | H | 4.61096400  | 4.42616800  | -3.84874200 |
| H | -4.31497600 | 1.08957600  | 1.35544500  | H | 6.53203200  | 4.97773100  | -2.36796400 |
| H | -5.76235800 | -1.38706500 | 1.33050000  | C | 1.17562100  | -0.22050000 | -2.60425700 |
| H | -6.09352400 | 0.20831400  | 0.66371800  | C | 0.61429100  | 0.74609500  | -3.44890100 |
| H | -5.58079800 | -0.23790800 | -2.26947500 | C | 0.48308600  | -1.42989300 | -2.42903400 |
| H | -7.00305400 | -1.20062000 | -4.06164200 | C | -0.61128300 | 0.52399700  | -4.08339500 |
| H | -8.71252900 | -2.91901800 | -3.50753100 | H | 1.15224500  | 1.67054500  | -3.63976600 |
| H | -8.99008300 | -3.66455600 | -1.15019100 | C | -0.74462900 | -1.65492200 | -3.05384700 |
| H | -7.56632500 | -2.70161200 | 0.63164900  | H | 0.92843000  | -2.21525900 | -1.82152700 |
| H | -3.95462800 | -2.26342100 | -1.05919900 | C | -1.29854500 | -0.67432600 | -3.88178400 |
| H | -2.48564600 | -1.42779200 | -0.57693900 | H | -1.01472300 | 1.27645300  | -4.75628600 |
| H | -1.51678100 | -1.83193500 | 1.73801500  | H | -1.25445200 | -2.60467800 | -2.91776000 |
| H | -1.33251400 | -3.38297700 | 3.64863900  | H | -2.24259600 | -0.85657300 | -4.38758200 |
| H | -2.98455600 | -5.22025800 | 3.93310000  | H | 1.10452500  | -3.03651600 | 2.68651100  |
| H | -4.83031900 | -5.48020800 | 2.28590600  | H | 0.97969900  | -2.79553600 | 5.14577300  |
|   |             |             |             | H | -4.49904400 | 1.99296200  | -0.92564100 |

|   |             |            |             |   |             |             |             |
|---|-------------|------------|-------------|---|-------------|-------------|-------------|
| H | -3.25315100 | 1.48026700 | -2.03932800 | H | -2.07402300 | 5.82047900  | 1.01895900  |
| H | -3.71343700 | 3.92849100 | -2.18256700 | H | -0.83216300 | 5.48551300  | -1.11150500 |
| H | -3.25580000 | 4.14210300 | -0.49515500 | H | -0.30131400 | 3.19597100  | -1.89115800 |
| O | -2.21372700 | 5.61555600 | 3.58570400  | H | 2.70791700  | 2.07010400  | -0.39724800 |
| C | -1.91424900 | 5.31191600 | 2.24694400  | H | 1.66462900  | 1.26292700  | -1.53975700 |
| H | -2.04704400 | 4.23381300 | 2.04071300  | H | 3.44776400  | -0.08153900 | -2.44831700 |
| H | -2.56762100 | 5.86456600 | 1.55047300  | H | 4.16008300  | 1.52534700  | -2.25103100 |
| C | -3.56529200 | 5.37193200 | 3.92571800  |   |             |             |             |
| H | -3.68366800 | 5.64321100 | 4.97680200  |   |             |             |             |
| H | -4.25132700 | 5.98079400 | 3.31707300  |   |             |             |             |
| H | -3.82942900 | 4.31005400 | 3.79696500  |   |             |             |             |
| C | -0.46246200 | 5.71147600 | 2.01972100  |   |             |             |             |
| H | -0.35176400 | 6.79628400 | 2.14720300  |   |             |             |             |
| H | 0.18342100  | 5.21408600 | 2.75757700  |   |             |             |             |
| O | -0.08586900 | 5.33754500 | 0.69462200  |   |             |             |             |
| C | 1.21177300  | 5.80612900 | 0.33048900  |   |             |             |             |
| H | 1.42055500  | 5.43358800 | -0.67420900 |   |             |             |             |
| H | 1.23842400  | 6.90314500 | 0.32907000  |   |             |             |             |
| H | 1.97826600  | 5.42873800 | 1.02079100  |   |             |             |             |

## 5

|   |             |             |             |
|---|-------------|-------------|-------------|
| C | 3.73689000  | 0.67293000  | -1.70629500 |
| C | 2.51993100  | 1.09555800  | -0.87595500 |
| C | 2.16228300  | 0.07901600  | 0.19342300  |
| C | 3.02630600  | -0.92475000 | 0.50261300  |
| C | 2.80568900  | -1.97671000 | 1.50047100  |
| H | 1.85227900  | -1.96542200 | 2.01702800  |
| C | 3.69229200  | -2.93655000 | 1.79918000  |
| H | 3.46349900  | -3.69233900 | 2.54459500  |
| H | 4.65822900  | -2.99256700 | 1.30983600  |
| C | 4.77824000  | 0.06602000  | -0.77843100 |
| H | 5.65938000  | -0.29360300 | -1.31696600 |
| H | 5.10451700  | 0.80482400  | -0.03032600 |
| O | 4.25209500  | -1.07708600 | -0.10712300 |
| N | -0.41958600 | -0.09043300 | 0.29081100  |
| C | 0.85189200  | 0.30531300  | 0.93593600  |
| C | -0.46487400 | -1.49193700 | -0.12633700 |
| C | -1.87839700 | -2.03745700 | -0.24239300 |
| C | -2.79349900 | -1.87309700 | 0.80764600  |
| C | -4.07656800 | -2.41231100 | 0.72518200  |
| C | -4.46658100 | -3.12872100 | -0.41038600 |
| C | -3.56479500 | -3.29772100 | -1.46125100 |
| C | -2.28089900 | -2.75247200 | -1.37580600 |
| C | -0.96253900 | 0.81288500  | -0.72609900 |
| C | -1.23785200 | 2.21560800  | -0.21790900 |
| C | -1.93728800 | 2.41690000  | 0.98130400  |
| C | -2.23493300 | 3.70498300  | 1.42427900  |
| C | -1.84111000 | 4.81668000  | 0.67347300  |
| C | -1.14572900 | 4.62836700  | -0.52104200 |
| C | -0.84480400 | 3.33592700  | -0.95903800 |
| H | 0.87903600  | -0.19827600 | 1.90680300  |
| H | 0.76192200  | 1.37551100  | 1.15682200  |
| H | 0.07221800  | -1.66789800 | -1.07667200 |
| H | 0.07339800  | -2.07346300 | 0.63112300  |
| H | -2.48921300 | -1.31071000 | 1.68619400  |
| H | -4.77399800 | -2.27612200 | 1.54796700  |
| H | -5.46674400 | -3.54918900 | -0.47459900 |
| H | -3.85966400 | -3.84897200 | -2.35051400 |
| H | -1.58192300 | -2.88410700 | -2.19918000 |
| H | -0.33816500 | 0.86906600  | -1.63651900 |
| H | -1.91261200 | 0.36869700  | -1.04994700 |
| H | -2.23864800 | 1.55151000  | 1.56444400  |
| H | -2.77797800 | 3.84322000  | 2.35589600  |
